# Supplementary material for: MicroRNA Expression Changes during Interferon-Beta Treatment in the Peripheral Blood of Multiple Sclerosis Patients
Source: MDPI journal article supplement (doi:10.3390/ijms140816087), 2013-08-05
Supplement: s5 [file s5]

Archive with 11 entries (11 files):
- CytoscapeSession-2013_05_28-11_16/IFN-beta-1b miRNA network.xgmml
- CytoscapeSession-2013_05_28-11_16/cysession.xml
- CytoscapeSession-2013_05_28-11_16/session_vizmap.props
- CytoscapeSession-2013_05_28-11_16/session_cytoscape.props
- CytoscapeSession-2013_05_28-11_16/session_bookmarks.xml
- CytoscapeSession-2013_05_28-11_16/plugins/CsFilter/old_filters.props
- CytoscapeSession-2013_05_28-11_16/plugins/FilterPlugin/session_filters.props
- CytoscapeSession-2013_05_28-11_16/plugins/ExprEssence/attributeBrowser.props
- CytoscapeSession-2013_05_28-11_16/plugins/ExprEssence/condensedNetworks.props
- CytoscapeSession-2013_05_28-11_16/plugins/AttributeBrowserPlugin/attributeBrowser.props
- CytoscapeSession-2013_05_28-11_16/images/image_metadata.props
