# Supplementary material for: MicroRNA Expression Changes during Interferon-Beta Treatment in the Peripheral Blood of Multiple Sclerosis Patients
Source: MDPI journal article supplement (doi:10.3390/ijms140816087), 2013-08-05
Supplement: s5 [file s5 › CytoscapeSession-2013_05_28-11_16/cysession.xml]

<?xml version="1.0" encoding="UTF-8" standalone="yes"?>
<cysession xmlns:xlink="http://www.w3.org/1999/xlink" xmlns:xsi="http://www.w3.org/2001/XMLSchema-instance" documentVersion="0.9" id="CytoscapeSession-2013_05_28-11_16">
    <sessionNote>You can add note for this session here.</sessionNote>
    <sessionState>
        <desktop>
            <desktopSize height="1015" width="1680"/>
            <networkFrames>
                <networkFrame y="25" x="309" height="593" width="710" frameID="IFN-beta-1b miRNA network"/>
            </networkFrames>
        </desktop>
        <server>
            <ontologyServer/>
        </server>
        <cytopanels>
            <cytopanel id="CytoPanel1">
                <panelState>dock</panelState>
                <selectedPanel>0</selectedPanel>
                <panels>
                    <panel id="test"/>
                </panels>
            </cytopanel>
            <cytopanel id="CytoPanel2">
                <panelState>dock</panelState>
                <selectedPanel>0</selectedPanel>
                <panels>
                    <panel id="test"/>
                </panels>
            </cytopanel>
            <cytopanel id="CytoPanel3">
                <panelState>hide</panelState>
                <selectedPanel>-1</selectedPanel>
                <panels>
                    <panel id="test"/>
                </panels>
            </cytopanel>
        </cytopanels>
    </sessionState>
    <networkTree>
        <network visualStyle="default" viewAvailable="true" id="IFN-beta-1b miRNA network" filename="IFN-beta-1b miRNA network.xgmml">
            <parent id="Network Root"/>
        </network>
        <network visualStyle="default" viewAvailable="false" id="Network Root" filename="Network Root.xgmml">
            <parent id="NULL"/>
            <child id="IFN-beta-1b miRNA network"/>
        </network>
    </networkTree>
</cysession>
