# Supplementary material for: MicroRNA Expression Changes during Interferon-Beta Treatment in the Peripheral Blood of Multiple Sclerosis Patients
Source: MDPI journal article supplement (doi:10.3390/ijms140816087), 2013-08-05
Supplement: s5 [file s5 › CytoscapeSession-2013_05_28-11_16/IFN-beta-1b miRNA network.xgmml]

<?xml version="1.0" encoding="UTF-8" standalone="yes"?>
<graph label="IFN-beta-1b miRNA network" xmlns:dc="http://purl.org/dc/elements/1.1/" xmlns:xlink="http://www.w3.org/1999/xlink" xmlns:rdf="http://www.w3.org/1999/02/22-rdf-syntax-ns#" xmlns:cy="http://www.cytoscape.org" xmlns="http://www.cs.rpi.edu/XGMML"  directed="1">
  <att name="documentVersion" value="1.1"/>
  <att name="networkMetadata">
    <rdf:RDF>
      <rdf:Description rdf:about="http://www.cytoscape.org/">
        <dc:type>Protein-Protein Interaction</dc:type>
        <dc:description>N/A</dc:description>
        <dc:identifier>N/A</dc:identifier>
        <dc:date>2013-05-28 11:16:03</dc:date>
        <dc:title>IFN-beta-1b miRNA network</dc:title>
        <dc:source>http://www.cytoscape.org/</dc:source>
        <dc:format>Cytoscape-XGMML</dc:format>
      </rdf:Description>
    </rdf:RDF>
  </att>
  <att type="string" name="backgroundColor" value="#ffffff"/>
  <att type="real" name="GRAPH_VIEW_ZOOM" value="0.7135882855573127"/>
  <att type="real" name="GRAPH_VIEW_CENTER_X" value="40.55577399076072"/>
  <att type="real" name="GRAPH_VIEW_CENTER_Y" value="988.1886590637034"/>
  <att type="string" name="__layoutAlgorithm" value="force-directed" cy:hidden="true"/>
  <node label="OAS2" id="-49">
    <att type="integer" name="Degree" value="1"/>
    <att type="string" name="Identifier" value="GC12P113416"/>
    <att type="string" name="MAID t0t1" value=""/>
    <att type="string" name="MAID t0t2" value=""/>
    <att type="string" name="MAID t0t3" value="Up"/>
    <att type="real" name="P t0t1" value="0.203895436517315"/>
    <att type="real" name="P t0t2" value="0.129211760094556"/>
    <att type="real" name="P t0t3" value="0.00158619790928024"/>
    <att type="string" name="Symbol" value="OAS2"/>
    <att type="string" name="Total" value="Up"/>
    <att type="string" name="Type" value="gene"/>
    <att type="string" name="canonicalName" value="OAS2"/>
    <graphics type="ELLIPSE" h="40.0" w="40.0" x="-10.064407348632812" y="847.1761474609375" fill="#ff3333" width="1" outline="#666666"/>
  </node>
  <node label="hsa-miR-346" id="-48">
    <att type="integer" name="Degree" value="5"/>
    <att type="string" name="Identifier" value="hsa-miR-346-4373038"/>
    <att type="string" name="MAID t0t1" value=""/>
    <att type="string" name="MAID t0t2" value=""/>
    <att type="string" name="MAID t0t3" value="Up"/>
    <att type="real" name="P t0t1" value="0.313175097537105"/>
    <att type="real" name="P t0t2" value="0.268803285733995"/>
    <att type="real" name="P t0t3" value="0.0258567080722601"/>
    <att type="string" name="Symbol" value="hsa-miR-346"/>
    <att type="string" name="Total" value="Up"/>
    <att type="string" name="Type" value="miRNA"/>
    <att type="string" name="canonicalName" value="hsa-miR-346"/>
    <graphics type="RECTANGLE" h="40.0" w="39.99999988079071" x="-21.066921293735504" y="920.6868286132812" fill="#ff3333" width="1" outline="#666666"/>
  </node>
  <node label="hsa-miR-518b" id="-47">
    <att type="integer" name="Degree" value="1"/>
    <att type="string" name="Identifier" value="hsa-miR-518b-4373246"/>
    <att type="string" name="MAID t0t1" value=""/>
    <att type="string" name="MAID t0t2" value=""/>
    <att type="string" name="MAID t0t3" value="Up"/>
    <att type="real" name="P t0t1" value="0.25438527877837"/>
    <att type="real" name="P t0t2" value="0.475564526451082"/>
    <att type="real" name="P t0t3" value="0.0268769815655342"/>
    <att type="string" name="Symbol" value="hsa-miR-518b"/>
    <att type="string" name="Total" value="Up"/>
    <att type="string" name="Type" value="miRNA"/>
    <att type="string" name="canonicalName" value="hsa-miR-518b"/>
    <graphics type="RECTANGLE" h="40.0" w="40.0" x="-277.13153076171875" y="1115.7200927734375" fill="#ff3333" width="1" outline="#666666"/>
  </node>
  <node label="EGR1" id="-46">
    <att type="integer" name="Degree" value="2"/>
    <att type="string" name="Identifier" value="GC05P137801"/>
    <att type="string" name="MAID t0t1" value=""/>
    <att type="string" name="MAID t0t2" value="Down"/>
    <att type="real" name="P t0t1" value="0.386957856942129"/>
    <att type="real" name="P t0t2" value="0.0393344278516115"/>
    <att type="real" name="P t0t3" value="0.876772266164471"/>
    <att type="string" name="Symbol" value="EGR1"/>
    <att type="string" name="Total" value="Down"/>
    <att type="string" name="Type" value="gene"/>
    <att type="string" name="canonicalName" value="EGR1"/>
    <graphics type="ELLIPSE" h="40.0" w="40.0" x="-320.0361633300781" y="1037.09228515625" fill="#33cc00" width="1" outline="#666666"/>
  </node>
  <node label="hsa-miR-423-5p" id="-45">
    <att type="integer" name="Degree" value="2"/>
    <att type="string" name="Identifier" value="hsa-miR-423-5p-4395451"/>
    <att type="string" name="MAID t0t1" value=""/>
    <att type="string" name="MAID t0t2" value=""/>
    <att type="string" name="MAID t0t3" value="Down"/>
    <att type="real" name="P t0t1" value="0.94163753779228"/>
    <att type="real" name="P t0t2" value="0.221884043446696"/>
    <att type="real" name="P t0t3" value="0.0091285901928911"/>
    <att type="string" name="Symbol" value="hsa-miR-423-5p"/>
    <att type="string" name="Total" value="Down"/>
    <att type="string" name="Type" value="miRNA"/>
    <att type="string" name="canonicalName" value="hsa-miR-423-5p"/>
    <graphics type="RECTANGLE" h="40.0" w="40.0" x="-328.67626953125" y="951.956298828125" fill="#33cc00" width="1" outline="#666666"/>
  </node>
  <node label="hsa-miR-342-5p" id="-44">
    <att type="integer" name="Degree" value="1"/>
    <att type="string" name="Identifier" value="hsa-miR-342-5p-4395258"/>
    <att type="string" name="MAID t0t1" value=""/>
    <att type="string" name="MAID t0t2" value=""/>
    <att type="string" name="MAID t0t3" value="Up"/>
    <att type="real" name="P t0t1" value="0.172602889154347"/>
    <att type="real" name="P t0t2" value="0.25684741844507"/>
    <att type="real" name="P t0t3" value="0.10397579259142"/>
    <att type="string" name="Symbol" value="hsa-miR-342-5p"/>
    <att type="string" name="Total" value="Up"/>
    <att type="string" name="Type" value="miRNA"/>
    <att type="string" name="canonicalName" value="hsa-miR-342-5p"/>
    <graphics type="RECTANGLE" h="40.0" w="40.0" x="87.58118438720703" y="941.4019165039062" fill="#ff3333" width="1" outline="#666666"/>
  </node>
  <node label="hsa-let-7b" id="-43">
    <att type="integer" name="Degree" value="5"/>
    <att type="string" name="Identifier" value="hsa-let-7b-4395446"/>
    <att type="string" name="MAID t0t1" value=""/>
    <att type="string" name="MAID t0t2" value=""/>
    <att type="string" name="MAID t0t3" value="Up"/>
    <att type="real" name="P t0t1" value="0.0631404807145415"/>
    <att type="real" name="P t0t2" value="0.414473706575804"/>
    <att type="real" name="P t0t3" value="0.14212334559254"/>
    <att type="string" name="Symbol" value="hsa-let-7b"/>
    <att type="string" name="Total" value="Up"/>
    <att type="string" name="Type" value="miRNA"/>
    <att type="string" name="canonicalName" value="hsa-let-7b"/>
    <att type="string" name="node.label" value="hsa-let-7b-5p"/>
    <graphics type="RECTANGLE" h="40.0" w="39.9999885559082" x="65.58054161071777" y="763.0327758789062" fill="#ff3333" width="1" outline="#666666"/>
  </node>
  <node label="hsa-miR-29c" id="-42">
    <att type="integer" name="Degree" value="8"/>
    <att type="string" name="Identifier" value="hsa-miR-29c-4395171"/>
    <att type="string" name="MAID t0t1" value=""/>
    <att type="string" name="MAID t0t2" value=""/>
    <att type="string" name="MAID t0t3" value="Down"/>
    <att type="real" name="P t0t1" value="0.00650051584046601"/>
    <att type="real" name="P t0t2" value="0.585281162026804"/>
    <att type="real" name="P t0t3" value="0.0165302117432888"/>
    <att type="string" name="Symbol" value="hsa-miR-29c"/>
    <att type="string" name="Total" value="Down"/>
    <att type="string" name="Type" value="miRNA"/>
    <att type="string" name="canonicalName" value="hsa-miR-29c"/>
    <att type="string" name="node.label" value="hsa-miR-29c-3p"/>
    <graphics type="RECTANGLE" h="40.0" w="40.0" x="194.2567138671875" y="966.803955078125" fill="#33cc00" width="1" outline="#666666"/>
  </node>
  <node label="EPSTI1" id="-41">
    <att type="integer" name="Degree" value="2"/>
    <att type="string" name="Identifier" value="GC13M043460"/>
    <att type="string" name="MAID t0t1" value=""/>
    <att type="string" name="MAID t0t2" value=""/>
    <att type="string" name="MAID t0t3" value="Up"/>
    <att type="real" name="P t0t1" value="0.0646036952387081"/>
    <att type="real" name="P t0t2" value="0.0536575048989832"/>
    <att type="real" name="P t0t3" value="0.00365691477970396"/>
    <att type="string" name="Symbol" value="EPSTI1"/>
    <att type="string" name="Total" value="Up"/>
    <att type="string" name="Type" value="gene"/>
    <att type="string" name="canonicalName" value="EPSTI1"/>
    <graphics type="ELLIPSE" h="40.0" w="40.0" x="283.1938171386719" y="875.6672973632812" fill="#ff3333" width="1" outline="#666666"/>
  </node>
  <node label="AHR" id="-40">
    <att type="integer" name="Degree" value="2"/>
    <att type="string" name="Identifier" value="GC07P017304"/>
    <att type="string" name="MAID t0t1" value="Down"/>
    <att type="string" name="MAID t0t2" value=""/>
    <att type="real" name="P t0t1" value="0.299313631969105"/>
    <att type="real" name="P t0t2" value="0.28313166073391"/>
    <att type="real" name="P t0t3" value="0.877601888686052"/>
    <att type="string" name="Symbol" value="AHR"/>
    <att type="string" name="Total" value="Down"/>
    <att type="string" name="Type" value="gene"/>
    <att type="string" name="canonicalName" value="AHR"/>
    <graphics type="ELLIPSE" h="40.0" w="40.0" x="282.7325134277344" y="1040.927490234375" fill="#33cc00" width="1" outline="#666666"/>
  </node>
  <node label="hsa-miR-29a" id="-39">
    <att type="integer" name="Degree" value="8"/>
    <att type="string" name="Identifier" value="hsa-miR-29a-4395223"/>
    <att type="string" name="MAID t0t1" value=""/>
    <att type="string" name="MAID t0t2" value=""/>
    <att type="string" name="MAID t0t3" value="Down"/>
    <att type="real" name="P t0t1" value="0.0725008801661578"/>
    <att type="real" name="P t0t2" value="0.862255483414726"/>
    <att type="real" name="P t0t3" value="0.0547793124539815"/>
    <att type="string" name="Symbol" value="hsa-miR-29a"/>
    <att type="string" name="Total" value="Down"/>
    <att type="string" name="Type" value="miRNA"/>
    <att type="string" name="canonicalName" value="hsa-miR-29a"/>
    <att type="string" name="node.label" value="hsa-miR-29a-3p"/>
    <graphics type="RECTANGLE" h="40.0" w="40.0" x="192.1197052001953" y="1023.10009765625" fill="#33cc00" width="1" outline="#666666"/>
  </node>
  <node label="CD163" id="-38">
    <att type="integer" name="Degree" value="1"/>
    <att type="string" name="Identifier" value="GC12M007523"/>
    <att type="string" name="MAID t0t1" value="Up"/>
    <att type="string" name="MAID t0t2" value="Up"/>
    <att type="real" name="P t0t1" value="0.0216425129775533"/>
    <att type="real" name="P t0t2" value="0.0881116576516522"/>
    <att type="real" name="P t0t3" value="0.827820306479796"/>
    <att type="string" name="Symbol" value="CD163"/>
    <att type="string" name="Total" value="Up"/>
    <att type="string" name="Type" value="gene"/>
    <att type="string" name="canonicalName" value="CD163"/>
    <graphics type="ELLIPSE" h="40.0" w="40.0" x="395.60784912109375" y="1206.0438232421875" fill="#ff3333" width="1" outline="#666666"/>
  </node>
  <node label="LY6E" id="-37">
    <att type="integer" name="Degree" value="1"/>
    <att type="string" name="Identifier" value="GC08P144171"/>
    <att type="string" name="MAID t0t1" value=""/>
    <att type="string" name="MAID t0t2" value=""/>
    <att type="string" name="MAID t0t3" value="Up"/>
    <att type="real" name="P t0t1" value="0.356496550897195"/>
    <att type="real" name="P t0t2" value="0.67150789985792"/>
    <att type="real" name="P t0t3" value="0.00223786835482859"/>
    <att type="string" name="Symbol" value="LY6E"/>
    <att type="string" name="Total" value="Up"/>
    <att type="string" name="Type" value="gene"/>
    <att type="string" name="canonicalName" value="LY6E"/>
    <graphics type="ELLIPSE" h="40.0" w="40.0" x="403.88531494140625" y="1058.59130859375" fill="#ff3333" width="1" outline="#666666"/>
  </node>
  <node label="HERC6" id="-36">
    <att type="integer" name="Degree" value="2"/>
    <att type="string" name="Identifier" value="GC04P089299"/>
    <att type="string" name="MAID t0t1" value=""/>
    <att type="string" name="MAID t0t2" value=""/>
    <att type="string" name="MAID t0t3" value="Up"/>
    <att type="real" name="P t0t1" value="0.291061989895072"/>
    <att type="real" name="P t0t2" value="0.0472068943370755"/>
    <att type="real" name="P t0t3" value="0.00291137015451271"/>
    <att type="string" name="Symbol" value="HERC6"/>
    <att type="string" name="Total" value="Up"/>
    <att type="string" name="Type" value="gene"/>
    <att type="string" name="canonicalName" value="HERC6"/>
    <graphics type="ELLIPSE" h="40.0" w="40.0" x="419.80706787109375" y="1151.7269287109375" fill="#ff3333" width="1" outline="#666666"/>
  </node>
  <node label="CXCL10" id="-35">
    <att type="integer" name="Degree" value="3"/>
    <att type="string" name="Identifier" value="GC04M076942"/>
    <att type="string" name="MAID t0t1" value=""/>
    <att type="string" name="MAID t0t2" value=""/>
    <att type="string" name="MAID t0t3" value="Up"/>
    <att type="real" name="P t0t1" value="0.12353326079263"/>
    <att type="real" name="P t0t2" value="0.74243079238148"/>
    <att type="real" name="P t0t3" value="0.265481724316925"/>
    <att type="string" name="Symbol" value="CXCL10"/>
    <att type="string" name="Total" value="Up"/>
    <att type="string" name="Type" value="gene"/>
    <att type="string" name="canonicalName" value="CXCL10"/>
    <graphics type="ELLIPSE" h="40.0" w="40.0" x="345.2544250488281" y="1000.885986328125" fill="#ff3333" width="1" outline="#666666"/>
  </node>
  <node label="hsa-miR-16" id="-34">
    <att type="integer" name="Degree" value="10"/>
    <att type="string" name="Identifier" value="hsa-miR-16-4373121"/>
    <att type="string" name="MAID t0t1" value=""/>
    <att type="string" name="MAID t0t2" value=""/>
    <att type="string" name="MAID t0t3" value="Up"/>
    <att type="real" name="P t0t1" value="0.190535914627298"/>
    <att type="real" name="P t0t2" value="0.522430839060738"/>
    <att type="real" name="P t0t3" value="0.0140758497380908"/>
    <att type="string" name="Symbol" value="hsa-miR-16"/>
    <att type="string" name="Total" value="Up"/>
    <att type="string" name="Type" value="miRNA"/>
    <att type="string" name="canonicalName" value="hsa-miR-16"/>
    <att type="string" name="node.label" value="hsa-miR-16-5p"/>
    <graphics type="RECTANGLE" h="40.0" w="40.0" x="298.8031921386719" y="1124.1744384765625" fill="#ff3333" width="1" outline="#666666"/>
  </node>
  <node label="TNFSF10" id="-33">
    <att type="integer" name="Degree" value="2"/>
    <att type="string" name="Identifier" value="GC03M172223"/>
    <att type="string" name="MAID t0t1" value=""/>
    <att type="string" name="MAID t0t2" value=""/>
    <att type="string" name="MAID t0t3" value="Up"/>
    <att type="real" name="P t0t1" value="0.179900455575233"/>
    <att type="real" name="P t0t2" value="0.0742899044892433"/>
    <att type="real" name="P t0t3" value="0.073501621717622"/>
    <att type="string" name="Symbol" value="TNFSF10"/>
    <att type="string" name="Total" value="Up"/>
    <att type="string" name="Type" value="gene"/>
    <att type="string" name="canonicalName" value="TNFSF10"/>
    <graphics type="ELLIPSE" h="40.0" w="40.0" x="-41.58297348022461" y="651.7405395507812" fill="#ff3333" width="1" outline="#666666"/>
  </node>
  <node label="IL8" id="-32">
    <att type="integer" name="Degree" value="2"/>
    <att type="string" name="Identifier" value="GC04P074595"/>
    <att type="string" name="MAID t0t1" value=""/>
    <att type="string" name="MAID t0t2" value="Down"/>
    <att type="real" name="P t0t1" value="0.0627121346318178"/>
    <att type="real" name="P t0t2" value="0.0166326151890234"/>
    <att type="real" name="P t0t3" value="0.0378794773714892"/>
    <att type="string" name="Symbol" value="IL8"/>
    <att type="string" name="Total" value="Down"/>
    <att type="string" name="Type" value="gene"/>
    <att type="string" name="canonicalName" value="IL8"/>
    <graphics type="ELLIPSE" h="40.0" w="40.0" x="44.09381866455078" y="635.5036010742188" fill="#33cc00" width="1" outline="#666666"/>
  </node>
  <node label="hsa-let-7a" id="-31">
    <att type="integer" name="Degree" value="4"/>
    <att type="string" name="Identifier" value="hsa-let-7a-4373169"/>
    <att type="string" name="MAID t0t1" value=""/>
    <att type="string" name="MAID t0t2" value=""/>
    <att type="string" name="MAID t0t3" value="Up"/>
    <att type="real" name="P t0t1" value="0.295138782456738"/>
    <att type="real" name="P t0t2" value="0.605675792895883"/>
    <att type="real" name="P t0t3" value="0.0737986243764104"/>
    <att type="string" name="Symbol" value="hsa-let-7a"/>
    <att type="string" name="Total" value="Up"/>
    <att type="string" name="Type" value="miRNA"/>
    <att type="string" name="canonicalName" value="hsa-let-7a"/>
    <att type="string" name="node.label" value="hsa-let-7a-5p"/>
    <graphics type="RECTANGLE" h="40.0" w="39.99999713897705" x="-18.176320552825928" y="740.80322265625" fill="#ff3333" width="1" outline="#666666"/>
  </node>
  <node label="XAF1" id="-30">
    <att type="integer" name="Degree" value="6"/>
    <att type="string" name="Identifier" value="GC17P006659"/>
    <att type="string" name="MAID t0t1" value=""/>
    <att type="string" name="MAID t0t2" value=""/>
    <att type="string" name="MAID t0t3" value="Up"/>
    <att type="real" name="P t0t1" value="0.0569031542847274"/>
    <att type="real" name="P t0t2" value="0.0169501006489414"/>
    <att type="real" name="P t0t3" value="0.0023696671116312"/>
    <att type="string" name="Symbol" value="XAF1"/>
    <att type="string" name="Total" value="Up"/>
    <att type="string" name="Type" value="gene"/>
    <att type="string" name="canonicalName" value="XAF1"/>
    <graphics type="ELLIPSE" h="40.0" w="40.0" x="79.45184326171875" y="869.9532470703125" fill="#ff3333" width="1" outline="#666666"/>
  </node>
  <node label="CD38" id="-29">
    <att type="integer" name="Degree" value="1"/>
    <att type="string" name="Identifier" value="GC04P015779"/>
    <att type="string" name="MAID t0t1" value="Up"/>
    <att type="string" name="MAID t0t2" value=""/>
    <att type="string" name="MAID t0t3" value="Up"/>
    <att type="real" name="P t0t1" value="0.0520502991537044"/>
    <att type="real" name="P t0t2" value="0.0700842191764556"/>
    <att type="real" name="P t0t3" value="0.0104034906006167"/>
    <att type="string" name="Symbol" value="CD38"/>
    <att type="string" name="Total" value="Up"/>
    <att type="string" name="Type" value="gene"/>
    <att type="string" name="canonicalName" value="CD38"/>
    <graphics type="ELLIPSE" h="40.0" w="40.0" x="321.1195983886719" y="792.012939453125" fill="#ff3333" width="1" outline="#666666"/>
  </node>
  <node label="DDX60L" id="-28">
    <att type="integer" name="Degree" value="1"/>
    <att type="string" name="Identifier" value="GC04M169277"/>
    <att type="string" name="MAID t0t1" value=""/>
    <att type="string" name="MAID t0t2" value=""/>
    <att type="string" name="MAID t0t3" value="Up"/>
    <att type="real" name="P t0t1" value="0.0218433923770575"/>
    <att type="real" name="P t0t2" value="0.282973667968131"/>
    <att type="real" name="P t0t3" value="0.0173885177364798"/>
    <att type="string" name="Symbol" value="DDX60L"/>
    <att type="string" name="Total" value="Up"/>
    <att type="string" name="Type" value="gene"/>
    <att type="string" name="canonicalName" value="DDX60L"/>
    <graphics type="ELLIPSE" h="40.0" w="40.0" x="265.7854919433594" y="729.72900390625" fill="#ff3333" width="1" outline="#666666"/>
  </node>
  <node label="IFIT5" id="-27">
    <att type="integer" name="Degree" value="2"/>
    <att type="string" name="Identifier" value="GC10P091164"/>
    <att type="string" name="MAID t0t1" value=""/>
    <att type="string" name="MAID t0t2" value=""/>
    <att type="string" name="MAID t0t3" value="Up"/>
    <att type="real" name="P t0t1" value="0.037386044321462"/>
    <att type="real" name="P t0t2" value="0.0830004238970753"/>
    <att type="real" name="P t0t3" value="9.08264430768262E-5"/>
    <att type="string" name="Symbol" value="IFIT5"/>
    <att type="string" name="Total" value="Up"/>
    <att type="string" name="Type" value="gene"/>
    <att type="string" name="canonicalName" value="IFIT5"/>
    <graphics type="ELLIPSE" h="40.0" w="40.0" x="168.175048828125" y="723.39111328125" fill="#ff3333" width="1" outline="#666666"/>
  </node>
  <node label="SESN1" id="-26">
    <att type="integer" name="Degree" value="4"/>
    <att type="string" name="Identifier" value="GC06M109353"/>
    <att type="string" name="MAID t0t1" value=""/>
    <att type="string" name="MAID t0t2" value="Up"/>
    <att type="real" name="P t0t1" value="0.17269983438372"/>
    <att type="real" name="P t0t2" value="0.0110811368639578"/>
    <att type="real" name="P t0t3" value="0.190592585396003"/>
    <att type="string" name="Symbol" value="SESN1"/>
    <att type="string" name="Total" value="Up"/>
    <att type="string" name="Type" value="gene"/>
    <att type="string" name="canonicalName" value="SESN1"/>
    <graphics type="ELLIPSE" h="40.0" w="40.0" x="292.6486511230469" y="945.2063598632812" fill="#ff3333" width="1" outline="#666666"/>
  </node>
  <node label="hsa-miR-708" id="-25">
    <att type="integer" name="Degree" value="6"/>
    <att type="string" name="Identifier" value="hsa-miR-708-4395452"/>
    <att type="string" name="MAID t0t1" value=""/>
    <att type="string" name="MAID t0t2" value="Down"/>
    <att type="string" name="MAID t0t3" value="Down"/>
    <att type="real" name="P t0t1" value="0.100376737081539"/>
    <att type="real" name="P t0t2" value="0.0598985388557757"/>
    <att type="real" name="P t0t3" value="0.0887484884965033"/>
    <att type="string" name="Symbol" value="hsa-miR-708"/>
    <att type="string" name="Total" value="Down"/>
    <att type="string" name="Type" value="miRNA"/>
    <att type="string" name="canonicalName" value="hsa-miR-708"/>
    <att type="string" name="node.label" value="hsa-miR-708-5p"/>
    <graphics type="RECTANGLE" h="40.0" w="40.0" x="199.31280517578125" y="849.43798828125" fill="#33cc00" width="1" outline="#666666"/>
  </node>
  <node label="CD83" id="-24">
    <att type="integer" name="Degree" value="4"/>
    <att type="string" name="Identifier" value="GC06P014117"/>
    <att type="string" name="MAID t0t1" value=""/>
    <att type="string" name="MAID t0t2" value="Down"/>
    <att type="real" name="P t0t1" value="0.323364865972656"/>
    <att type="real" name="P t0t2" value="0.0222220297312668"/>
    <att type="real" name="P t0t3" value="0.441298490561917"/>
    <att type="string" name="Symbol" value="CD83"/>
    <att type="string" name="Total" value="Down"/>
    <att type="string" name="Type" value="gene"/>
    <att type="string" name="canonicalName" value="CD83"/>
    <graphics type="ELLIPSE" h="40.0" w="40.0" x="142.31661987304688" y="1110.43310546875" fill="#33cc00" width="1" outline="#666666"/>
  </node>
  <node label="MS4A4A" id="-23">
    <att type="integer" name="Degree" value="1"/>
    <att type="string" name="Identifier" value="GC11P060048"/>
    <att type="string" name="MAID t0t1" value=""/>
    <att type="string" name="MAID t0t2" value=""/>
    <att type="string" name="MAID t0t3" value="Up"/>
    <att type="real" name="P t0t1" value="0.0267591234482614"/>
    <att type="real" name="P t0t2" value="0.606175466847857"/>
    <att type="real" name="P t0t3" value="5.03832417149681E-4"/>
    <att type="string" name="Symbol" value="MS4A4A"/>
    <att type="string" name="Total" value="Up"/>
    <att type="string" name="Type" value="gene"/>
    <att type="string" name="canonicalName" value="MS4A4A"/>
    <graphics type="ELLIPSE" h="40.0" w="40.0" x="-79.74676513671875" y="1275.337646484375" fill="#ff3333" width="1" outline="#666666"/>
  </node>
  <node label="TRIM22" id="-22">
    <att type="integer" name="Degree" value="1"/>
    <att type="string" name="Identifier" value="GC11P005667"/>
    <att type="string" name="MAID t0t1" value=""/>
    <att type="string" name="MAID t0t2" value=""/>
    <att type="string" name="MAID t0t3" value="Up"/>
    <att type="real" name="P t0t1" value="0.0613686315639878"/>
    <att type="real" name="P t0t2" value="0.0147392538643446"/>
    <att type="real" name="P t0t3" value="0.0063737740962917"/>
    <att type="string" name="Symbol" value="TRIM22"/>
    <att type="string" name="Total" value="Up"/>
    <att type="string" name="Type" value="gene"/>
    <att type="string" name="canonicalName" value="TRIM22"/>
    <graphics type="ELLIPSE" h="40.0" w="40.0" x="35.07470703125" y="1322.4443359375" fill="#ff3333" width="1" outline="#666666"/>
  </node>
  <node label="GBP1" id="-21">
    <att type="integer" name="Degree" value="1"/>
    <att type="string" name="Identifier" value="GC01M089517"/>
    <att type="string" name="MAID t0t1" value=""/>
    <att type="string" name="MAID t0t2" value=""/>
    <att type="string" name="MAID t0t3" value="Up"/>
    <att type="real" name="P t0t1" value="0.586475591602656"/>
    <att type="real" name="P t0t2" value="0.146480965657153"/>
    <att type="real" name="P t0t3" value="0.189878831227771"/>
    <att type="string" name="Symbol" value="GBP1"/>
    <att type="string" name="Total" value="Up"/>
    <att type="string" name="Type" value="gene"/>
    <att type="string" name="canonicalName" value="GBP1"/>
    <graphics type="ELLIPSE" h="40.0" w="40.0" x="-31.897216796875" y="1315.510986328125" fill="#ff3333" width="1" outline="#666666"/>
  </node>
  <node label="STAT1" id="-20">
    <att type="integer" name="Degree" value="1"/>
    <att type="string" name="Identifier" value="GC02M191829"/>
    <att type="string" name="MAID t0t1" value=""/>
    <att type="string" name="MAID t0t2" value=""/>
    <att type="string" name="MAID t0t3" value="Up"/>
    <att type="real" name="P t0t1" value="0.741937349144779"/>
    <att type="real" name="P t0t2" value="0.125635207852632"/>
    <att type="real" name="P t0t3" value="0.0632526802213407"/>
    <att type="string" name="Symbol" value="STAT1"/>
    <att type="string" name="Total" value="Up"/>
    <att type="string" name="Type" value="gene"/>
    <att type="string" name="canonicalName" value="STAT1"/>
    <graphics type="ELLIPSE" h="40.0" w="40.0" x="-98.3902587890625" y="1211.022216796875" fill="#ff3333" width="1" outline="#666666"/>
  </node>
  <node label="hsa-miR-532-5p" id="-19">
    <att type="integer" name="Degree" value="9"/>
    <att type="string" name="Identifier" value="hsa-miR-532-5p-4380928"/>
    <att type="string" name="MAID t0t1" value=""/>
    <att type="string" name="MAID t0t2" value="Down"/>
    <att type="real" name="P t0t1" value="0.207518091666806"/>
    <att type="real" name="P t0t2" value="6.96544230060392E-4"/>
    <att type="real" name="P t0t3" value="0.019816183625666"/>
    <att type="string" name="Symbol" value="hsa-miR-532-5p"/>
    <att type="string" name="Total" value="Down"/>
    <att type="string" name="Type" value="miRNA"/>
    <att type="string" name="canonicalName" value="hsa-miR-532-5p"/>
    <graphics type="RECTANGLE" h="40.0" w="40.0" x="26.1864013671875" y="1195.0205078125" fill="#33cc00" width="1" outline="#666666"/>
  </node>
  <node label="ITGAE" id="-18">
    <att type="integer" name="Degree" value="1"/>
    <att type="string" name="Identifier" value="GC17M003564"/>
    <att type="string" name="MAID t0t1" value=""/>
    <att type="string" name="MAID t0t2" value=""/>
    <att type="string" name="MAID t0t3" value="Down"/>
    <att type="real" name="P t0t1" value="0.24521839084538"/>
    <att type="real" name="P t0t2" value="0.367048503935966"/>
    <att type="real" name="P t0t3" value="0.00483742294121533"/>
    <att type="string" name="Symbol" value="ITGAE"/>
    <att type="string" name="Total" value="Down"/>
    <att type="string" name="Type" value="gene"/>
    <att type="string" name="canonicalName" value="ITGAE"/>
    <graphics type="ELLIPSE" h="40.0" w="40.0" x="340.26324462890625" y="1238.1248779296875" fill="#33cc00" width="1" outline="#666666"/>
  </node>
  <node label="TUBA1A" id="-17">
    <att type="integer" name="Degree" value="2"/>
    <att type="string" name="Identifier" value="GC12M049578"/>
    <att type="string" name="MAID t0t1" value=""/>
    <att type="string" name="MAID t0t2" value="Down"/>
    <att type="real" name="P t0t1" value="0.204144725316913"/>
    <att type="real" name="P t0t2" value="0.00362670490849273"/>
    <att type="real" name="P t0t3" value="0.0789980536990419"/>
    <att type="string" name="Symbol" value="TUBA1A"/>
    <att type="string" name="Total" value="Down"/>
    <att type="string" name="Type" value="gene"/>
    <att type="string" name="canonicalName" value="TUBA1A"/>
    <graphics type="ELLIPSE" h="40.0" w="40.0" x="274.6326904296875" y="1239.5347900390625" fill="#33cc00" width="1" outline="#666666"/>
  </node>
  <node label="hsa-miR-193a-5p" id="-16">
    <att type="integer" name="Degree" value="2"/>
    <att type="string" name="Identifier" value="hsa-miR-193a-5p-4395392"/>
    <att type="string" name="MAID t0t1" value=""/>
    <att type="string" name="MAID t0t2" value="Down"/>
    <att type="real" name="P t0t1" value="0.0905651874336021"/>
    <att type="real" name="P t0t2" value="0.0236909095983481"/>
    <att type="real" name="P t0t3" value="0.724553916999542"/>
    <att type="string" name="Symbol" value="hsa-miR-193a-5p"/>
    <att type="string" name="Total" value="Down"/>
    <att type="string" name="Type" value="miRNA"/>
    <att type="string" name="canonicalName" value="hsa-miR-193a-5p"/>
    <graphics type="RECTANGLE" h="40.0" w="40.0" x="309.89556884765625" y="1332.860107421875" fill="#33cc00" width="1" outline="#666666"/>
  </node>
  <node label="SIGLEC1" id="-15">
    <att type="integer" name="Degree" value="4"/>
    <att type="string" name="Identifier" value="GC20M003616"/>
    <att type="string" name="MAID t0t1" value="Up"/>
    <att type="string" name="MAID t0t2" value="Up"/>
    <att type="string" name="MAID t0t3" value="Up"/>
    <att type="real" name="P t0t1" value="0.0119519459745635"/>
    <att type="real" name="P t0t2" value="5.26761006321073E-4"/>
    <att type="real" name="P t0t3" value="9.03757341234024E-4"/>
    <att type="string" name="Symbol" value="SIGLEC1"/>
    <att type="string" name="Total" value="Up"/>
    <att type="string" name="Type" value="gene"/>
    <att type="string" name="canonicalName" value="SIGLEC1"/>
    <graphics type="ELLIPSE" h="40.0" w="40.0" x="34.442344665527344" y="1004.3330078125" fill="#ff3333" width="1" outline="#666666"/>
  </node>
  <node label="OAS3" id="-14">
    <att type="integer" name="Degree" value="1"/>
    <att type="string" name="Identifier" value="GC12P113376"/>
    <att type="string" name="MAID t0t1" value=""/>
    <att type="string" name="MAID t0t2" value=""/>
    <att type="string" name="MAID t0t3" value="Up"/>
    <att type="real" name="P t0t1" value="0.174709143799523"/>
    <att type="real" name="P t0t2" value="0.305990163671831"/>
    <att type="real" name="P t0t3" value="0.00240360639151938"/>
    <att type="string" name="Symbol" value="OAS3"/>
    <att type="string" name="Total" value="Up"/>
    <att type="string" name="Type" value="gene"/>
    <att type="string" name="canonicalName" value="OAS3"/>
    <graphics type="ELLIPSE" h="40.0" w="40.0" x="-169.0145263671875" y="857.7889404296875" fill="#ff3333" width="1" outline="#666666"/>
  </node>
  <node label="IL1B" id="-13">
    <att type="integer" name="Degree" value="1"/>
    <att type="string" name="Identifier" value="GC02M113682"/>
    <att type="string" name="MAID t0t1" value=""/>
    <att type="string" name="MAID t0t2" value="Down"/>
    <att type="real" name="P t0t1" value="0.0116168384842461"/>
    <att type="real" name="P t0t2" value="8.15979681295231E-4"/>
    <att type="real" name="P t0t3" value="0.362444891539628"/>
    <att type="string" name="Symbol" value="IL1B"/>
    <att type="string" name="Total" value="Down"/>
    <att type="string" name="Type" value="gene"/>
    <att type="string" name="canonicalName" value="IL1B"/>
    <graphics type="ELLIPSE" h="40.0" w="40.0" x="-207.34243774414062" y="909.9086303710938" fill="#33cc00" width="1" outline="#666666"/>
  </node>
  <node label="SAMD9L" id="-12">
    <att type="integer" name="Degree" value="3"/>
    <att type="string" name="Identifier" value="GC07M092759"/>
    <att type="string" name="MAID t0t1" value=""/>
    <att type="string" name="MAID t0t2" value=""/>
    <att type="string" name="MAID t0t3" value="Up"/>
    <att type="real" name="P t0t1" value="0.0821445105139623"/>
    <att type="real" name="P t0t2" value="0.232100964534437"/>
    <att type="real" name="P t0t3" value="0.00323725520001962"/>
    <att type="string" name="Symbol" value="SAMD9L"/>
    <att type="string" name="Total" value="Up"/>
    <att type="string" name="Type" value="gene"/>
    <att type="string" name="canonicalName" value="SAMD9L"/>
    <graphics type="ELLIPSE" h="40.0" w="40.0" x="-86.31499481201172" y="839.301025390625" fill="#ff3333" width="1" outline="#666666"/>
  </node>
  <node label="FKBP5" id="-11">
    <att type="integer" name="Degree" value="1"/>
    <att type="string" name="Identifier" value="GC06M035541"/>
    <att type="string" name="MAID t0t1" value=""/>
    <att type="string" name="MAID t0t2" value="Up"/>
    <att type="real" name="P t0t1" value="0.264044617240758"/>
    <att type="real" name="P t0t2" value="0.0126801246221061"/>
    <att type="real" name="P t0t3" value="0.00364966807139205"/>
    <att type="string" name="Symbol" value="FKBP5"/>
    <att type="string" name="Total" value="Up"/>
    <att type="string" name="Type" value="gene"/>
    <att type="string" name="canonicalName" value="FKBP5"/>
    <graphics type="ELLIPSE" h="40.0" w="40.0" x="-179.36915588378906" y="1092.25341796875" fill="#ff3333" width="1" outline="#666666"/>
  </node>
  <node label="hsa-miR-149" id="-10">
    <att type="integer" name="Degree" value="8"/>
    <att type="string" name="Identifier" value="hsa-miR-149-4395366"/>
    <att type="string" name="MAID t0t1" value=""/>
    <att type="string" name="MAID t0t2" value="Down"/>
    <att type="string" name="MAID t0t3" value="Down"/>
    <att type="real" name="P t0t1" value="0.0505023971245667"/>
    <att type="real" name="P t0t2" value="0.00385995389740125"/>
    <att type="real" name="P t0t3" value="0.0117928363675185"/>
    <att type="string" name="Symbol" value="hsa-miR-149"/>
    <att type="string" name="Total" value="Down"/>
    <att type="string" name="Type" value="miRNA"/>
    <att type="string" name="canonicalName" value="hsa-miR-149"/>
    <att type="string" name="node.label" value="hsa-miR-149-5p"/>
    <graphics type="RECTANGLE" h="40.0" w="40.00000762939453" x="-72.14153671264648" y="971.6699829101562" fill="#33cc00" width="1" outline="#666666"/>
  </node>
  <node label="TSC22D3" id="-9">
    <att type="integer" name="Degree" value="4"/>
    <att type="string" name="Identifier" value="GC0XM106956"/>
    <att type="string" name="MAID t0t1" value=""/>
    <att type="string" name="MAID t0t2" value="Up"/>
    <att type="real" name="P t0t1" value="0.925629323781912"/>
    <att type="real" name="P t0t2" value="0.0412885663947757"/>
    <att type="real" name="P t0t3" value="0.606484135092728"/>
    <att type="string" name="Symbol" value="TSC22D3"/>
    <att type="string" name="Total" value="Up"/>
    <att type="string" name="Type" value="gene"/>
    <att type="string" name="canonicalName" value="TSC22D3"/>
    <graphics type="ELLIPSE" h="40.0" w="40.0" x="215.24571228027344" y="1155.6253662109375" fill="#ff3333" width="1" outline="#666666"/>
  </node>
  <node label="RSAD2" id="-8">
    <att type="integer" name="Degree" value="2"/>
    <att type="string" name="Identifier" value="GC02P007005"/>
    <att type="string" name="MAID t0t1" value=""/>
    <att type="string" name="MAID t0t2" value="Up"/>
    <att type="string" name="MAID t0t3" value="Up"/>
    <att type="real" name="P t0t1" value="0.051303588252084"/>
    <att type="real" name="P t0t2" value="0.00784092847144415"/>
    <att type="real" name="P t0t3" value="0.00235179049028505"/>
    <att type="string" name="Symbol" value="RSAD2"/>
    <att type="string" name="Total" value="Up"/>
    <att type="string" name="Type" value="gene"/>
    <att type="string" name="canonicalName" value="RSAD2"/>
    <graphics type="ELLIPSE" h="40.0" w="40.0" x="95.0077896118164" y="1302.6094970703125" fill="#ff3333" width="1" outline="#666666"/>
  </node>
  <node label="MX1" id="-7">
    <att type="integer" name="Degree" value="1"/>
    <att type="string" name="Identifier" value="GC21P042792"/>
    <att type="string" name="MAID t0t1" value=""/>
    <att type="string" name="MAID t0t2" value="Up"/>
    <att type="string" name="MAID t0t3" value="Up"/>
    <att type="real" name="P t0t1" value="0.0543123287500961"/>
    <att type="real" name="P t0t2" value="0.0244676179467276"/>
    <att type="real" name="P t0t3" value="7.02010718600281E-4"/>
    <att type="string" name="Symbol" value="MX1"/>
    <att type="string" name="Total" value="Up"/>
    <att type="string" name="Type" value="gene"/>
    <att type="string" name="canonicalName" value="MX1"/>
    <graphics type="ELLIPSE" h="40.0" w="40.0" x="181.6942596435547" y="1303.4610595703125" fill="#ff3333" width="1" outline="#666666"/>
  </node>
  <node label="CMPK2" id="-6">
    <att type="integer" name="Degree" value="3"/>
    <att type="string" name="Identifier" value="GC02M006980"/>
    <att type="string" name="MAID t0t1" value=""/>
    <att type="string" name="MAID t0t2" value=""/>
    <att type="string" name="MAID t0t3" value="Up"/>
    <att type="real" name="P t0t1" value="0.056489038650299"/>
    <att type="real" name="P t0t2" value="0.028263190387907"/>
    <att type="real" name="P t0t3" value="0.00144157467429014"/>
    <att type="string" name="Symbol" value="CMPK2"/>
    <att type="string" name="Total" value="Up"/>
    <att type="string" name="Type" value="gene"/>
    <att type="string" name="canonicalName" value="CMPK2"/>
    <graphics type="ELLIPSE" h="40.0" w="40.0" x="-8.031492233276367" y="1100.464111328125" fill="#ff3333" width="1" outline="#666666"/>
  </node>
  <node label="hsa-miR-760" id="-5">
    <att type="integer" name="Degree" value="4"/>
    <att type="string" name="Identifier" value="hsa-miR-760-4395439"/>
    <att type="string" name="MAID t0t1" value="Up"/>
    <att type="string" name="MAID t0t2" value=""/>
    <att type="real" name="P t0t1" value="0.239273681203776"/>
    <att type="real" name="P t0t2" value="0.348050548643356"/>
    <att type="real" name="P t0t3" value="0.0412043698821581"/>
    <att type="string" name="Symbol" value="hsa-miR-760"/>
    <att type="string" name="Total" value="Up"/>
    <att type="string" name="Type" value="miRNA"/>
    <att type="string" name="canonicalName" value="hsa-miR-760"/>
    <graphics type="RECTANGLE" h="40.0" w="40.0" x="131.40576171875" y="1209.701416015625" fill="#ff3333" width="1" outline="#666666"/>
  </node>
  <node label="ANKRD22" id="-4">
    <att type="integer" name="Degree" value="2"/>
    <att type="string" name="Identifier" value="GC10M090572"/>
    <att type="string" name="MAID t0t1" value=""/>
    <att type="string" name="MAID t0t2" value=""/>
    <att type="string" name="MAID t0t3" value="Up"/>
    <att type="real" name="P t0t1" value="0.161870802604748"/>
    <att type="real" name="P t0t2" value="0.0299493345791606"/>
    <att type="real" name="P t0t3" value="0.232274586056379"/>
    <att type="string" name="Symbol" value="ANKRD22"/>
    <att type="string" name="Total" value="Up"/>
    <att type="string" name="Type" value="gene"/>
    <att type="string" name="canonicalName" value="ANKRD22"/>
    <graphics type="ELLIPSE" h="40.0" w="40.0" x="-206.79750061035156" y="1038.2408447265625" fill="#ff3333" width="1" outline="#666666"/>
  </node>
  <node label="PAX5" id="-3">
    <att type="integer" name="Degree" value="4"/>
    <att type="string" name="Identifier" value="GC09M036828"/>
    <att type="string" name="MAID t0t1" value=""/>
    <att type="string" name="MAID t0t2" value=""/>
    <att type="string" name="MAID t0t3" value="Down"/>
    <att type="real" name="P t0t1" value="0.082116152532632"/>
    <att type="real" name="P t0t2" value="0.295715488708726"/>
    <att type="real" name="P t0t3" value="0.00579462503413218"/>
    <att type="string" name="Symbol" value="PAX5"/>
    <att type="string" name="Total" value="Down"/>
    <att type="string" name="Type" value="gene"/>
    <att type="string" name="canonicalName" value="PAX5"/>
    <graphics type="ELLIPSE" h="40.0" w="40.0" x="-193.24053955078125" y="976.4583129882812" fill="#33cc00" width="1" outline="#666666"/>
  </node>
  <node label="SH3BGRL2" id="-2">
    <att type="integer" name="Degree" value="7"/>
    <att type="string" name="Identifier" value="GC06P080397"/>
    <att type="string" name="MAID t0t1" value=""/>
    <att type="string" name="MAID t0t2" value=""/>
    <att type="string" name="MAID t0t3" value="Down"/>
    <att type="real" name="P t0t1" value="0.320101623303701"/>
    <att type="real" name="P t0t2" value="0.20802579644984"/>
    <att type="real" name="P t0t3" value="0.0188805317055257"/>
    <att type="string" name="Symbol" value="SH3BGRL2"/>
    <att type="string" name="Total" value="Down"/>
    <att type="string" name="Type" value="gene"/>
    <att type="string" name="canonicalName" value="SH3BGRL2"/>
    <graphics type="ELLIPSE" h="40.0" w="40.0" x="75.49755096435547" y="1062.570556640625" fill="#33cc00" width="1" outline="#666666"/>
  </node>
  <node label="hsa-miR-874" id="-1">
    <att type="integer" name="Degree" value="3"/>
    <att type="string" name="Identifier" value="hsa-miR-874-4395379"/>
    <att type="string" name="MAID t0t1" value="Down"/>
    <att type="string" name="MAID t0t2" value=""/>
    <att type="real" name="P t0t1" value="0.0304272820636981"/>
    <att type="real" name="P t0t2" value="0.861992878855632"/>
    <att type="real" name="P t0t3" value="0.280595864656691"/>
    <att type="string" name="Symbol" value="hsa-miR-874"/>
    <att type="string" name="Total" value="Down"/>
    <att type="string" name="Type" value="miRNA"/>
    <att type="string" name="canonicalName" value="hsa-miR-874"/>
    <graphics type="RECTANGLE" h="40.0" w="40.0" x="-84.74031066894531" y="1057.4947509765625" fill="#33cc00" width="1" outline="#666666"/>
  </node>
  <edge label="hsa-miR-346 (MirWalk) XAF1" source="-48" target="-30">
    <att type="integer" name="DIANAmT" value="1"/>
    <att type="integer" name="PICTAR4" value="0"/>
    <att type="integer" name="PICTAR5" value="0"/>
    <att type="integer" name="PITA" value="1"/>
    <att type="integer" name="RNA22" value="1"/>
    <att type="integer" name="RNAhybrid" value="0"/>
    <att type="integer" name="Sum" value="6"/>
    <att type="integer" name="Targetscan" value="1"/>
    <att type="string" name="canonicalName" value="hsa-miR-346 (MirWalk) XAF1"/>
    <att type="string" name="interaction" value="MirWalk" cy:editable="false"/>
    <att type="integer" name="miRDB" value="0"/>
    <att type="integer" name="miRWalk" value="1"/>
    <att type="integer" name="miRanda" value="1"/>
    <graphics width="1" fill="#333333"/>
  </edge>
  <edge label="hsa-miR-346 (MirWalk) OAS2" source="-48" target="-49">
    <att type="integer" name="DIANAmT" value="1"/>
    <att type="integer" name="PICTAR4" value="0"/>
    <att type="integer" name="PICTAR5" value="0"/>
    <att type="integer" name="PITA" value="1"/>
    <att type="integer" name="RNA22" value="0"/>
    <att type="integer" name="RNAhybrid" value="0"/>
    <att type="integer" name="Sum" value="5"/>
    <att type="integer" name="Targetscan" value="1"/>
    <att type="string" name="canonicalName" value="hsa-miR-346 (MirWalk) OAS2"/>
    <att type="string" name="interaction" value="MirWalk" cy:editable="false"/>
    <att type="integer" name="miRDB" value="0"/>
    <att type="integer" name="miRWalk" value="1"/>
    <att type="integer" name="miRanda" value="1"/>
    <graphics width="1" fill="#333333"/>
  </edge>
  <edge label="hsa-miR-346 (MirWalk) SIGLEC1" source="-48" target="-15">
    <att type="integer" name="DIANAmT" value="1"/>
    <att type="integer" name="PICTAR4" value="0"/>
    <att type="integer" name="PICTAR5" value="0"/>
    <att type="integer" name="PITA" value="1"/>
    <att type="integer" name="RNA22" value="0"/>
    <att type="integer" name="RNAhybrid" value="0"/>
    <att type="integer" name="Sum" value="5"/>
    <att type="integer" name="Targetscan" value="1"/>
    <att type="string" name="canonicalName" value="hsa-miR-346 (MirWalk) SIGLEC1"/>
    <att type="string" name="interaction" value="MirWalk" cy:editable="false"/>
    <att type="integer" name="miRDB" value="0"/>
    <att type="integer" name="miRWalk" value="1"/>
    <att type="integer" name="miRanda" value="1"/>
    <graphics width="1" fill="#333333"/>
  </edge>
  <edge label="hsa-miR-346 (MirWalk) PAX5" source="-48" target="-3">
    <att type="integer" name="DIANAmT" value="1"/>
    <att type="integer" name="PICTAR4" value="0"/>
    <att type="integer" name="PICTAR5" value="0"/>
    <att type="integer" name="PITA" value="1"/>
    <att type="integer" name="RNA22" value="1"/>
    <att type="integer" name="RNAhybrid" value="0"/>
    <att type="integer" name="Sum" value="6"/>
    <att type="integer" name="Targetscan" value="1"/>
    <att type="string" name="canonicalName" value="hsa-miR-346 (MirWalk) PAX5"/>
    <att type="string" name="interaction" value="MirWalk" cy:editable="false"/>
    <att type="integer" name="miRDB" value="0"/>
    <att type="integer" name="miRWalk" value="1"/>
    <att type="integer" name="miRanda" value="1"/>
    <graphics width="1" fill="#333333"/>
  </edge>
  <edge label="hsa-miR-346 (MirWalk) CMPK2" source="-48" target="-6">
    <att type="integer" name="DIANAmT" value="1"/>
    <att type="integer" name="PICTAR4" value="0"/>
    <att type="integer" name="PICTAR5" value="0"/>
    <att type="integer" name="PITA" value="1"/>
    <att type="integer" name="RNA22" value="1"/>
    <att type="integer" name="RNAhybrid" value="0"/>
    <att type="integer" name="Sum" value="6"/>
    <att type="integer" name="Targetscan" value="1"/>
    <att type="string" name="canonicalName" value="hsa-miR-346 (MirWalk) CMPK2"/>
    <att type="string" name="interaction" value="MirWalk" cy:editable="false"/>
    <att type="integer" name="miRDB" value="0"/>
    <att type="integer" name="miRWalk" value="1"/>
    <att type="integer" name="miRanda" value="1"/>
    <graphics width="1" fill="#333333"/>
  </edge>
  <edge label="hsa-miR-518b (MirWalk) EGR1" source="-47" target="-46">
    <att type="integer" name="DIANAmT" value="1"/>
    <att type="integer" name="PICTAR4" value="0"/>
    <att type="integer" name="PICTAR5" value="0"/>
    <att type="integer" name="PITA" value="1"/>
    <att type="integer" name="RNA22" value="0"/>
    <att type="integer" name="RNAhybrid" value="0"/>
    <att type="integer" name="Sum" value="5"/>
    <att type="integer" name="Targetscan" value="1"/>
    <att type="string" name="canonicalName" value="hsa-miR-518b (MirWalk) EGR1"/>
    <att type="string" name="interaction" value="MirWalk" cy:editable="false"/>
    <att type="integer" name="miRDB" value="0"/>
    <att type="integer" name="miRWalk" value="1"/>
    <att type="integer" name="miRanda" value="1"/>
    <graphics width="1" fill="#333333"/>
  </edge>
  <edge label="hsa-miR-423-5p (MirWalk) PAX5" source="-45" target="-3">
    <att type="integer" name="DIANAmT" value="1"/>
    <att type="integer" name="PICTAR4" value="0"/>
    <att type="integer" name="PICTAR5" value="0"/>
    <att type="integer" name="PITA" value="1"/>
    <att type="integer" name="RNA22" value="0"/>
    <att type="integer" name="RNAhybrid" value="0"/>
    <att type="integer" name="Sum" value="5"/>
    <att type="integer" name="Targetscan" value="1"/>
    <att type="string" name="canonicalName" value="hsa-miR-423-5p (MirWalk) PAX5"/>
    <att type="string" name="interaction" value="MirWalk" cy:editable="false"/>
    <att type="integer" name="miRDB" value="0"/>
    <att type="integer" name="miRWalk" value="1"/>
    <att type="integer" name="miRanda" value="1"/>
    <graphics width="1" fill="#333333"/>
  </edge>
  <edge label="hsa-miR-423-5p (MirWalk) EGR1" source="-45" target="-46">
    <att type="integer" name="DIANAmT" value="1"/>
    <att type="integer" name="PICTAR4" value="0"/>
    <att type="integer" name="PICTAR5" value="0"/>
    <att type="integer" name="PITA" value="1"/>
    <att type="integer" name="RNA22" value="0"/>
    <att type="integer" name="RNAhybrid" value="0"/>
    <att type="integer" name="Sum" value="5"/>
    <att type="integer" name="Targetscan" value="1"/>
    <att type="string" name="canonicalName" value="hsa-miR-423-5p (MirWalk) EGR1"/>
    <att type="string" name="interaction" value="MirWalk" cy:editable="false"/>
    <att type="integer" name="miRDB" value="0"/>
    <att type="integer" name="miRWalk" value="1"/>
    <att type="integer" name="miRanda" value="1"/>
    <graphics width="1" fill="#333333"/>
  </edge>
  <edge label="hsa-miR-342-5p (MirWalk) SH3BGRL2" source="-44" target="-2">
    <att type="integer" name="DIANAmT" value="1"/>
    <att type="integer" name="PICTAR4" value="0"/>
    <att type="integer" name="PICTAR5" value="0"/>
    <att type="integer" name="PITA" value="1"/>
    <att type="integer" name="RNA22" value="0"/>
    <att type="integer" name="RNAhybrid" value="0"/>
    <att type="integer" name="Sum" value="5"/>
    <att type="integer" name="Targetscan" value="1"/>
    <att type="string" name="canonicalName" value="hsa-miR-342-5p (MirWalk) SH3BGRL2"/>
    <att type="string" name="interaction" value="MirWalk" cy:editable="false"/>
    <att type="integer" name="miRDB" value="0"/>
    <att type="integer" name="miRWalk" value="1"/>
    <att type="integer" name="miRanda" value="1"/>
    <graphics width="1" fill="#333333"/>
  </edge>
  <edge label="hsa-let-7b (MirTarBase) IFIT5" source="-43" target="-27">
    <att type="string" name="canonicalName" value="hsa-let-7b (MirTarBase) IFIT5"/>
    <att type="string" name="interaction" value="MirTarBase" cy:editable="false"/>
    <graphics width="1" fill="#ff00ff"/>
  </edge>
  <edge label="hsa-let-7b (MirWalk) XAF1" source="-43" target="-30">
    <att type="integer" name="DIANAmT" value="1"/>
    <att type="integer" name="PICTAR4" value="0"/>
    <att type="integer" name="PICTAR5" value="0"/>
    <att type="integer" name="PITA" value="1"/>
    <att type="integer" name="RNA22" value="0"/>
    <att type="integer" name="RNAhybrid" value="0"/>
    <att type="integer" name="Sum" value="5"/>
    <att type="integer" name="Targetscan" value="1"/>
    <att type="string" name="canonicalName" value="hsa-let-7b (MirWalk) XAF1"/>
    <att type="string" name="interaction" value="MirWalk" cy:editable="false"/>
    <att type="integer" name="miRDB" value="0"/>
    <att type="integer" name="miRWalk" value="1"/>
    <att type="integer" name="miRanda" value="1"/>
    <graphics width="1" fill="#333333"/>
  </edge>
  <edge label="hsa-let-7b (MirWalk) SAMD9L" source="-43" target="-12">
    <att type="integer" name="DIANAmT" value="1"/>
    <att type="integer" name="PICTAR4" value="0"/>
    <att type="integer" name="PICTAR5" value="0"/>
    <att type="integer" name="PITA" value="1"/>
    <att type="integer" name="RNA22" value="0"/>
    <att type="integer" name="RNAhybrid" value="0"/>
    <att type="integer" name="Sum" value="5"/>
    <att type="integer" name="Targetscan" value="1"/>
    <att type="string" name="canonicalName" value="hsa-let-7b (MirWalk) SAMD9L"/>
    <att type="string" name="interaction" value="MirWalk" cy:editable="false"/>
    <att type="integer" name="miRDB" value="0"/>
    <att type="integer" name="miRWalk" value="1"/>
    <att type="integer" name="miRanda" value="1"/>
    <graphics width="1" fill="#333333"/>
  </edge>
  <edge label="hsa-let-7b (MirWalk) TNFSF10" source="-43" target="-33">
    <att type="integer" name="DIANAmT" value="1"/>
    <att type="integer" name="PICTAR4" value="0"/>
    <att type="integer" name="PICTAR5" value="0"/>
    <att type="integer" name="PITA" value="1"/>
    <att type="integer" name="RNA22" value="0"/>
    <att type="integer" name="RNAhybrid" value="0"/>
    <att type="integer" name="Sum" value="6"/>
    <att type="integer" name="Targetscan" value="1"/>
    <att type="string" name="canonicalName" value="hsa-let-7b (MirWalk) TNFSF10"/>
    <att type="string" name="interaction" value="MirWalk" cy:editable="false"/>
    <att type="integer" name="miRDB" value="1"/>
    <att type="integer" name="miRWalk" value="1"/>
    <att type="integer" name="miRanda" value="1"/>
    <graphics width="1" fill="#333333"/>
  </edge>
  <edge label="hsa-let-7b (MirWalk) IL8" source="-43" target="-32">
    <att type="integer" name="DIANAmT" value="1"/>
    <att type="integer" name="PICTAR4" value="1"/>
    <att type="integer" name="PICTAR5" value="0"/>
    <att type="integer" name="PITA" value="1"/>
    <att type="integer" name="RNA22" value="0"/>
    <att type="integer" name="RNAhybrid" value="0"/>
    <att type="integer" name="Sum" value="6"/>
    <att type="integer" name="Targetscan" value="1"/>
    <att type="string" name="canonicalName" value="hsa-let-7b (MirWalk) IL8"/>
    <att type="string" name="interaction" value="MirWalk" cy:editable="false"/>
    <att type="integer" name="miRDB" value="0"/>
    <att type="integer" name="miRWalk" value="1"/>
    <att type="integer" name="miRanda" value="1"/>
    <graphics width="1" fill="#333333"/>
  </edge>
  <edge label="hsa-miR-29c (MirWalk) XAF1" source="-42" target="-30">
    <att type="integer" name="DIANAmT" value="1"/>
    <att type="integer" name="PICTAR4" value="0"/>
    <att type="integer" name="PICTAR5" value="0"/>
    <att type="integer" name="PITA" value="1"/>
    <att type="integer" name="RNA22" value="0"/>
    <att type="integer" name="RNAhybrid" value="0"/>
    <att type="integer" name="Sum" value="5"/>
    <att type="integer" name="Targetscan" value="1"/>
    <att type="string" name="canonicalName" value="hsa-miR-29c (MirWalk) XAF1"/>
    <att type="string" name="interaction" value="MirWalk" cy:editable="false"/>
    <att type="integer" name="miRDB" value="0"/>
    <att type="integer" name="miRWalk" value="1"/>
    <att type="integer" name="miRanda" value="1"/>
    <graphics width="1" fill="#333333"/>
  </edge>
  <edge label="hsa-miR-29c (MirWalk) CXCL10" source="-42" target="-35">
    <att type="integer" name="DIANAmT" value="1"/>
    <att type="integer" name="PICTAR4" value="0"/>
    <att type="integer" name="PICTAR5" value="0"/>
    <att type="integer" name="PITA" value="1"/>
    <att type="integer" name="RNA22" value="0"/>
    <att type="integer" name="RNAhybrid" value="0"/>
    <att type="integer" name="Sum" value="5"/>
    <att type="integer" name="Targetscan" value="1"/>
    <att type="string" name="canonicalName" value="hsa-miR-29c (MirWalk) CXCL10"/>
    <att type="string" name="interaction" value="MirWalk" cy:editable="false"/>
    <att type="integer" name="miRDB" value="0"/>
    <att type="integer" name="miRWalk" value="1"/>
    <att type="integer" name="miRanda" value="1"/>
    <graphics width="1" fill="#333333"/>
  </edge>
  <edge label="hsa-miR-29c (MirWalk) SH3BGRL2" source="-42" target="-2">
    <att type="integer" name="DIANAmT" value="1"/>
    <att type="integer" name="PICTAR4" value="0"/>
    <att type="integer" name="PICTAR5" value="0"/>
    <att type="integer" name="PITA" value="1"/>
    <att type="integer" name="RNA22" value="0"/>
    <att type="integer" name="RNAhybrid" value="0"/>
    <att type="integer" name="Sum" value="5"/>
    <att type="integer" name="Targetscan" value="1"/>
    <att type="string" name="canonicalName" value="hsa-miR-29c (MirWalk) SH3BGRL2"/>
    <att type="string" name="interaction" value="MirWalk" cy:editable="false"/>
    <att type="integer" name="miRDB" value="0"/>
    <att type="integer" name="miRWalk" value="1"/>
    <att type="integer" name="miRanda" value="1"/>
    <graphics width="1" fill="#333333"/>
  </edge>
  <edge label="hsa-miR-29c (MirWalk) EPSTI1" source="-42" target="-41">
    <att type="integer" name="DIANAmT" value="1"/>
    <att type="integer" name="PICTAR4" value="0"/>
    <att type="integer" name="PICTAR5" value="0"/>
    <att type="integer" name="PITA" value="1"/>
    <att type="integer" name="RNA22" value="0"/>
    <att type="integer" name="RNAhybrid" value="0"/>
    <att type="integer" name="Sum" value="5"/>
    <att type="integer" name="Targetscan" value="1"/>
    <att type="string" name="canonicalName" value="hsa-miR-29c (MirWalk) EPSTI1"/>
    <att type="string" name="interaction" value="MirWalk" cy:editable="false"/>
    <att type="integer" name="miRDB" value="0"/>
    <att type="integer" name="miRWalk" value="1"/>
    <att type="integer" name="miRanda" value="1"/>
    <graphics width="1" fill="#333333"/>
  </edge>
  <edge label="hsa-miR-29c (MirWalk) CD83" source="-42" target="-24">
    <att type="integer" name="DIANAmT" value="1"/>
    <att type="integer" name="PICTAR4" value="0"/>
    <att type="integer" name="PICTAR5" value="0"/>
    <att type="integer" name="PITA" value="1"/>
    <att type="integer" name="RNA22" value="0"/>
    <att type="integer" name="RNAhybrid" value="0"/>
    <att type="integer" name="Sum" value="5"/>
    <att type="integer" name="Targetscan" value="1"/>
    <att type="string" name="canonicalName" value="hsa-miR-29c (MirWalk) CD83"/>
    <att type="string" name="interaction" value="MirWalk" cy:editable="false"/>
    <att type="integer" name="miRDB" value="0"/>
    <att type="integer" name="miRWalk" value="1"/>
    <att type="integer" name="miRanda" value="1"/>
    <graphics width="1" fill="#333333"/>
  </edge>
  <edge label="hsa-miR-29c (MirWalk) SESN1" source="-42" target="-26">
    <att type="integer" name="DIANAmT" value="1"/>
    <att type="integer" name="PICTAR4" value="0"/>
    <att type="integer" name="PICTAR5" value="0"/>
    <att type="integer" name="PITA" value="1"/>
    <att type="integer" name="RNA22" value="0"/>
    <att type="integer" name="RNAhybrid" value="1"/>
    <att type="integer" name="Sum" value="6"/>
    <att type="integer" name="Targetscan" value="1"/>
    <att type="string" name="canonicalName" value="hsa-miR-29c (MirWalk) SESN1"/>
    <att type="string" name="interaction" value="MirWalk" cy:editable="false"/>
    <att type="integer" name="miRDB" value="0"/>
    <att type="integer" name="miRWalk" value="1"/>
    <att type="integer" name="miRanda" value="1"/>
    <graphics width="1" fill="#333333"/>
  </edge>
  <edge label="hsa-miR-29c (MirWalk) AHR" source="-42" target="-40">
    <att type="integer" name="DIANAmT" value="0"/>
    <att type="integer" name="PICTAR4" value="1"/>
    <att type="integer" name="PICTAR5" value="0"/>
    <att type="integer" name="PITA" value="1"/>
    <att type="integer" name="RNA22" value="0"/>
    <att type="integer" name="RNAhybrid" value="0"/>
    <att type="integer" name="Sum" value="6"/>
    <att type="integer" name="Targetscan" value="1"/>
    <att type="string" name="canonicalName" value="hsa-miR-29c (MirWalk) AHR"/>
    <att type="string" name="interaction" value="MirWalk" cy:editable="false"/>
    <att type="integer" name="miRDB" value="1"/>
    <att type="integer" name="miRWalk" value="1"/>
    <att type="integer" name="miRanda" value="1"/>
    <graphics width="1" fill="#333333"/>
  </edge>
  <edge label="hsa-miR-29c (MirWalk) TSC22D3" source="-42" target="-9">
    <att type="integer" name="DIANAmT" value="1"/>
    <att type="integer" name="PICTAR4" value="1"/>
    <att type="integer" name="PICTAR5" value="0"/>
    <att type="integer" name="PITA" value="1"/>
    <att type="integer" name="RNA22" value="0"/>
    <att type="integer" name="RNAhybrid" value="1"/>
    <att type="integer" name="Sum" value="7"/>
    <att type="integer" name="Targetscan" value="1"/>
    <att type="string" name="canonicalName" value="hsa-miR-29c (MirWalk) TSC22D3"/>
    <att type="string" name="interaction" value="MirWalk" cy:editable="false"/>
    <att type="integer" name="miRDB" value="0"/>
    <att type="integer" name="miRWalk" value="1"/>
    <att type="integer" name="miRanda" value="1"/>
    <graphics width="1" fill="#333333"/>
  </edge>
  <edge label="hsa-miR-29a (MirWalk) XAF1" source="-39" target="-30">
    <att type="integer" name="DIANAmT" value="1"/>
    <att type="integer" name="PICTAR4" value="0"/>
    <att type="integer" name="PICTAR5" value="0"/>
    <att type="integer" name="PITA" value="1"/>
    <att type="integer" name="RNA22" value="1"/>
    <att type="integer" name="RNAhybrid" value="0"/>
    <att type="integer" name="Sum" value="6"/>
    <att type="integer" name="Targetscan" value="1"/>
    <att type="string" name="canonicalName" value="hsa-miR-29a (MirWalk) XAF1"/>
    <att type="string" name="interaction" value="MirWalk" cy:editable="false"/>
    <att type="integer" name="miRDB" value="0"/>
    <att type="integer" name="miRWalk" value="1"/>
    <att type="integer" name="miRanda" value="1"/>
    <graphics width="1" fill="#333333"/>
  </edge>
  <edge label="hsa-miR-29a (MirWalk) EPSTI1" source="-39" target="-41">
    <att type="integer" name="DIANAmT" value="1"/>
    <att type="integer" name="PICTAR4" value="0"/>
    <att type="integer" name="PICTAR5" value="0"/>
    <att type="integer" name="PITA" value="1"/>
    <att type="integer" name="RNA22" value="0"/>
    <att type="integer" name="RNAhybrid" value="0"/>
    <att type="integer" name="Sum" value="5"/>
    <att type="integer" name="Targetscan" value="1"/>
    <att type="string" name="canonicalName" value="hsa-miR-29a (MirWalk) EPSTI1"/>
    <att type="string" name="interaction" value="MirWalk" cy:editable="false"/>
    <att type="integer" name="miRDB" value="0"/>
    <att type="integer" name="miRWalk" value="1"/>
    <att type="integer" name="miRanda" value="1"/>
    <graphics width="1" fill="#333333"/>
  </edge>
  <edge label="hsa-miR-29a (MirWalk) CD83" source="-39" target="-24">
    <att type="integer" name="DIANAmT" value="1"/>
    <att type="integer" name="PICTAR4" value="0"/>
    <att type="integer" name="PICTAR5" value="0"/>
    <att type="integer" name="PITA" value="1"/>
    <att type="integer" name="RNA22" value="0"/>
    <att type="integer" name="RNAhybrid" value="0"/>
    <att type="integer" name="Sum" value="5"/>
    <att type="integer" name="Targetscan" value="1"/>
    <att type="string" name="canonicalName" value="hsa-miR-29a (MirWalk) CD83"/>
    <att type="string" name="interaction" value="MirWalk" cy:editable="false"/>
    <att type="integer" name="miRDB" value="0"/>
    <att type="integer" name="miRWalk" value="1"/>
    <att type="integer" name="miRanda" value="1"/>
    <graphics width="1" fill="#333333"/>
  </edge>
  <edge label="hsa-miR-29a (MirWalk) SH3BGRL2" source="-39" target="-2">
    <att type="integer" name="DIANAmT" value="1"/>
    <att type="integer" name="PICTAR4" value="0"/>
    <att type="integer" name="PICTAR5" value="0"/>
    <att type="integer" name="PITA" value="1"/>
    <att type="integer" name="RNA22" value="0"/>
    <att type="integer" name="RNAhybrid" value="0"/>
    <att type="integer" name="Sum" value="5"/>
    <att type="integer" name="Targetscan" value="1"/>
    <att type="string" name="canonicalName" value="hsa-miR-29a (MirWalk) SH3BGRL2"/>
    <att type="string" name="interaction" value="MirWalk" cy:editable="false"/>
    <att type="integer" name="miRDB" value="0"/>
    <att type="integer" name="miRWalk" value="1"/>
    <att type="integer" name="miRanda" value="1"/>
    <graphics width="1" fill="#333333"/>
  </edge>
  <edge label="hsa-miR-29a (MirWalk) CXCL10" source="-39" target="-35">
    <att type="integer" name="DIANAmT" value="1"/>
    <att type="integer" name="PICTAR4" value="0"/>
    <att type="integer" name="PICTAR5" value="0"/>
    <att type="integer" name="PITA" value="1"/>
    <att type="integer" name="RNA22" value="0"/>
    <att type="integer" name="RNAhybrid" value="0"/>
    <att type="integer" name="Sum" value="5"/>
    <att type="integer" name="Targetscan" value="1"/>
    <att type="string" name="canonicalName" value="hsa-miR-29a (MirWalk) CXCL10"/>
    <att type="string" name="interaction" value="MirWalk" cy:editable="false"/>
    <att type="integer" name="miRDB" value="0"/>
    <att type="integer" name="miRWalk" value="1"/>
    <att type="integer" name="miRanda" value="1"/>
    <graphics width="1" fill="#333333"/>
  </edge>
  <edge label="hsa-miR-29a (MirWalk) SESN1" source="-39" target="-26">
    <att type="integer" name="DIANAmT" value="1"/>
    <att type="integer" name="PICTAR4" value="0"/>
    <att type="integer" name="PICTAR5" value="0"/>
    <att type="integer" name="PITA" value="1"/>
    <att type="integer" name="RNA22" value="0"/>
    <att type="integer" name="RNAhybrid" value="1"/>
    <att type="integer" name="Sum" value="6"/>
    <att type="integer" name="Targetscan" value="1"/>
    <att type="string" name="canonicalName" value="hsa-miR-29a (MirWalk) SESN1"/>
    <att type="string" name="interaction" value="MirWalk" cy:editable="false"/>
    <att type="integer" name="miRDB" value="0"/>
    <att type="integer" name="miRWalk" value="1"/>
    <att type="integer" name="miRanda" value="1"/>
    <graphics width="1" fill="#333333"/>
  </edge>
  <edge label="hsa-miR-29a (MirWalk) AHR" source="-39" target="-40">
    <att type="integer" name="DIANAmT" value="0"/>
    <att type="integer" name="PICTAR4" value="1"/>
    <att type="integer" name="PICTAR5" value="0"/>
    <att type="integer" name="PITA" value="1"/>
    <att type="integer" name="RNA22" value="0"/>
    <att type="integer" name="RNAhybrid" value="0"/>
    <att type="integer" name="Sum" value="6"/>
    <att type="integer" name="Targetscan" value="1"/>
    <att type="string" name="canonicalName" value="hsa-miR-29a (MirWalk) AHR"/>
    <att type="string" name="interaction" value="MirWalk" cy:editable="false"/>
    <att type="integer" name="miRDB" value="1"/>
    <att type="integer" name="miRWalk" value="1"/>
    <att type="integer" name="miRanda" value="1"/>
    <graphics width="1" fill="#333333"/>
  </edge>
  <edge label="hsa-miR-29a (MirWalk) TSC22D3" source="-39" target="-9">
    <att type="integer" name="DIANAmT" value="1"/>
    <att type="integer" name="PICTAR4" value="1"/>
    <att type="integer" name="PICTAR5" value="0"/>
    <att type="integer" name="PITA" value="1"/>
    <att type="integer" name="RNA22" value="0"/>
    <att type="integer" name="RNAhybrid" value="1"/>
    <att type="integer" name="Sum" value="7"/>
    <att type="integer" name="Targetscan" value="1"/>
    <att type="string" name="canonicalName" value="hsa-miR-29a (MirWalk) TSC22D3"/>
    <att type="string" name="interaction" value="MirWalk" cy:editable="false"/>
    <att type="integer" name="miRDB" value="0"/>
    <att type="integer" name="miRWalk" value="1"/>
    <att type="integer" name="miRanda" value="1"/>
    <graphics width="1" fill="#333333"/>
  </edge>
  <edge label="hsa-miR-16 (MirTarBase) HERC6" source="-34" target="-36">
    <att type="string" name="canonicalName" value="hsa-miR-16 (MirTarBase) HERC6"/>
    <att type="string" name="interaction" value="MirTarBase" cy:editable="false"/>
    <graphics width="1" fill="#ff00ff"/>
  </edge>
  <edge label="hsa-miR-16 (MirWalk) CD163" source="-34" target="-38">
    <att type="integer" name="DIANAmT" value="1"/>
    <att type="integer" name="PICTAR4" value="0"/>
    <att type="integer" name="PICTAR5" value="0"/>
    <att type="integer" name="PITA" value="1"/>
    <att type="integer" name="RNA22" value="0"/>
    <att type="integer" name="RNAhybrid" value="0"/>
    <att type="integer" name="Sum" value="5"/>
    <att type="integer" name="Targetscan" value="1"/>
    <att type="string" name="canonicalName" value="hsa-miR-16 (MirWalk) CD163"/>
    <att type="string" name="interaction" value="MirWalk" cy:editable="false"/>
    <att type="integer" name="miRDB" value="0"/>
    <att type="integer" name="miRWalk" value="1"/>
    <att type="integer" name="miRanda" value="1"/>
    <graphics width="1" fill="#333333"/>
  </edge>
  <edge label="hsa-miR-16 (MirWalk) LY6E" source="-34" target="-37">
    <att type="integer" name="DIANAmT" value="1"/>
    <att type="integer" name="PICTAR4" value="1"/>
    <att type="integer" name="PICTAR5" value="0"/>
    <att type="integer" name="PITA" value="1"/>
    <att type="integer" name="RNA22" value="0"/>
    <att type="integer" name="RNAhybrid" value="0"/>
    <att type="integer" name="Sum" value="5"/>
    <att type="integer" name="Targetscan" value="1"/>
    <att type="string" name="canonicalName" value="hsa-miR-16 (MirWalk) LY6E"/>
    <att type="string" name="interaction" value="MirWalk" cy:editable="false"/>
    <att type="integer" name="miRDB" value="0"/>
    <att type="integer" name="miRWalk" value="0"/>
    <att type="integer" name="miRanda" value="1"/>
    <graphics width="1" fill="#333333"/>
  </edge>
  <edge label="hsa-miR-16 (MirWalk) CD83" source="-34" target="-24">
    <att type="integer" name="DIANAmT" value="1"/>
    <att type="integer" name="PICTAR4" value="0"/>
    <att type="integer" name="PICTAR5" value="0"/>
    <att type="integer" name="PITA" value="1"/>
    <att type="integer" name="RNA22" value="0"/>
    <att type="integer" name="RNAhybrid" value="0"/>
    <att type="integer" name="Sum" value="5"/>
    <att type="integer" name="Targetscan" value="1"/>
    <att type="string" name="canonicalName" value="hsa-miR-16 (MirWalk) CD83"/>
    <att type="string" name="interaction" value="MirWalk" cy:editable="false"/>
    <att type="integer" name="miRDB" value="0"/>
    <att type="integer" name="miRWalk" value="1"/>
    <att type="integer" name="miRanda" value="1"/>
    <graphics width="1" fill="#333333"/>
  </edge>
  <edge label="hsa-miR-16 (MirWalk) HERC6" source="-34" target="-36">
    <att type="integer" name="DIANAmT" value="1"/>
    <att type="integer" name="PICTAR4" value="0"/>
    <att type="integer" name="PICTAR5" value="0"/>
    <att type="integer" name="PITA" value="1"/>
    <att type="integer" name="RNA22" value="0"/>
    <att type="integer" name="RNAhybrid" value="0"/>
    <att type="integer" name="Sum" value="5"/>
    <att type="integer" name="Targetscan" value="1"/>
    <att type="string" name="canonicalName" value="hsa-miR-16 (MirWalk) HERC6"/>
    <att type="string" name="interaction" value="MirWalk" cy:editable="false"/>
    <att type="integer" name="miRDB" value="0"/>
    <att type="integer" name="miRWalk" value="1"/>
    <att type="integer" name="miRanda" value="1"/>
    <graphics width="1" fill="#333333"/>
  </edge>
  <edge label="hsa-miR-16 (MirWalk) CXCL10" source="-34" target="-35">
    <att type="integer" name="DIANAmT" value="1"/>
    <att type="integer" name="PICTAR4" value="0"/>
    <att type="integer" name="PICTAR5" value="0"/>
    <att type="integer" name="PITA" value="1"/>
    <att type="integer" name="RNA22" value="0"/>
    <att type="integer" name="RNAhybrid" value="0"/>
    <att type="integer" name="Sum" value="5"/>
    <att type="integer" name="Targetscan" value="1"/>
    <att type="string" name="canonicalName" value="hsa-miR-16 (MirWalk) CXCL10"/>
    <att type="string" name="interaction" value="MirWalk" cy:editable="false"/>
    <att type="integer" name="miRDB" value="0"/>
    <att type="integer" name="miRWalk" value="1"/>
    <att type="integer" name="miRanda" value="1"/>
    <graphics width="1" fill="#333333"/>
  </edge>
  <edge label="hsa-miR-16 (MirWalk) TUBA1A" source="-34" target="-17">
    <att type="integer" name="DIANAmT" value="0"/>
    <att type="integer" name="PICTAR4" value="1"/>
    <att type="integer" name="PICTAR5" value="0"/>
    <att type="integer" name="PITA" value="1"/>
    <att type="integer" name="RNA22" value="0"/>
    <att type="integer" name="RNAhybrid" value="1"/>
    <att type="integer" name="Sum" value="6"/>
    <att type="integer" name="Targetscan" value="1"/>
    <att type="string" name="canonicalName" value="hsa-miR-16 (MirWalk) TUBA1A"/>
    <att type="string" name="interaction" value="MirWalk" cy:editable="false"/>
    <att type="integer" name="miRDB" value="0"/>
    <att type="integer" name="miRWalk" value="1"/>
    <att type="integer" name="miRanda" value="1"/>
    <graphics width="1" fill="#333333"/>
  </edge>
  <edge label="hsa-miR-16 (MirWalk) SH3BGRL2" source="-34" target="-2">
    <att type="integer" name="DIANAmT" value="1"/>
    <att type="integer" name="PICTAR4" value="1"/>
    <att type="integer" name="PICTAR5" value="0"/>
    <att type="integer" name="PITA" value="1"/>
    <att type="integer" name="RNA22" value="0"/>
    <att type="integer" name="RNAhybrid" value="0"/>
    <att type="integer" name="Sum" value="7"/>
    <att type="integer" name="Targetscan" value="1"/>
    <att type="string" name="canonicalName" value="hsa-miR-16 (MirWalk) SH3BGRL2"/>
    <att type="string" name="interaction" value="MirWalk" cy:editable="false"/>
    <att type="integer" name="miRDB" value="1"/>
    <att type="integer" name="miRWalk" value="1"/>
    <att type="integer" name="miRanda" value="1"/>
    <graphics width="1" fill="#333333"/>
  </edge>
  <edge label="hsa-miR-16 (MirWalk) TSC22D3" source="-34" target="-9">
    <att type="integer" name="DIANAmT" value="1"/>
    <att type="integer" name="PICTAR4" value="1"/>
    <att type="integer" name="PICTAR5" value="0"/>
    <att type="integer" name="PITA" value="1"/>
    <att type="integer" name="RNA22" value="0"/>
    <att type="integer" name="RNAhybrid" value="1"/>
    <att type="integer" name="Sum" value="7"/>
    <att type="integer" name="Targetscan" value="1"/>
    <att type="string" name="canonicalName" value="hsa-miR-16 (MirWalk) TSC22D3"/>
    <att type="string" name="interaction" value="MirWalk" cy:editable="false"/>
    <att type="integer" name="miRDB" value="0"/>
    <att type="integer" name="miRWalk" value="1"/>
    <att type="integer" name="miRanda" value="1"/>
    <graphics width="1" fill="#333333"/>
  </edge>
  <edge label="hsa-miR-16 (MirWalk) SESN1" source="-34" target="-26">
    <att type="integer" name="DIANAmT" value="1"/>
    <att type="integer" name="PICTAR4" value="1"/>
    <att type="integer" name="PICTAR5" value="1"/>
    <att type="integer" name="PITA" value="1"/>
    <att type="integer" name="RNA22" value="0"/>
    <att type="integer" name="RNAhybrid" value="1"/>
    <att type="integer" name="Sum" value="9"/>
    <att type="integer" name="Targetscan" value="1"/>
    <att type="string" name="canonicalName" value="hsa-miR-16 (MirWalk) SESN1"/>
    <att type="string" name="interaction" value="MirWalk" cy:editable="false"/>
    <att type="integer" name="miRDB" value="1"/>
    <att type="integer" name="miRWalk" value="1"/>
    <att type="integer" name="miRanda" value="1"/>
    <graphics width="1" fill="#333333"/>
  </edge>
  <edge label="hsa-let-7a (MirWalk) XAF1" source="-31" target="-30">
    <att type="integer" name="DIANAmT" value="1"/>
    <att type="integer" name="PICTAR4" value="0"/>
    <att type="integer" name="PICTAR5" value="0"/>
    <att type="integer" name="PITA" value="1"/>
    <att type="integer" name="RNA22" value="0"/>
    <att type="integer" name="RNAhybrid" value="0"/>
    <att type="integer" name="Sum" value="5"/>
    <att type="integer" name="Targetscan" value="1"/>
    <att type="string" name="canonicalName" value="hsa-let-7a (MirWalk) XAF1"/>
    <att type="string" name="interaction" value="MirWalk" cy:editable="false"/>
    <att type="integer" name="miRDB" value="0"/>
    <att type="integer" name="miRWalk" value="1"/>
    <att type="integer" name="miRanda" value="1"/>
    <graphics width="1" fill="#333333"/>
  </edge>
  <edge label="hsa-let-7a (MirWalk) SAMD9L" source="-31" target="-12">
    <att type="integer" name="DIANAmT" value="1"/>
    <att type="integer" name="PICTAR4" value="0"/>
    <att type="integer" name="PICTAR5" value="0"/>
    <att type="integer" name="PITA" value="1"/>
    <att type="integer" name="RNA22" value="0"/>
    <att type="integer" name="RNAhybrid" value="0"/>
    <att type="integer" name="Sum" value="5"/>
    <att type="integer" name="Targetscan" value="1"/>
    <att type="string" name="canonicalName" value="hsa-let-7a (MirWalk) SAMD9L"/>
    <att type="string" name="interaction" value="MirWalk" cy:editable="false"/>
    <att type="integer" name="miRDB" value="0"/>
    <att type="integer" name="miRWalk" value="1"/>
    <att type="integer" name="miRanda" value="1"/>
    <graphics width="1" fill="#333333"/>
  </edge>
  <edge label="hsa-let-7a (MirWalk) TNFSF10" source="-31" target="-33">
    <att type="integer" name="DIANAmT" value="1"/>
    <att type="integer" name="PICTAR4" value="0"/>
    <att type="integer" name="PICTAR5" value="0"/>
    <att type="integer" name="PITA" value="1"/>
    <att type="integer" name="RNA22" value="0"/>
    <att type="integer" name="RNAhybrid" value="0"/>
    <att type="integer" name="Sum" value="6"/>
    <att type="integer" name="Targetscan" value="1"/>
    <att type="string" name="canonicalName" value="hsa-let-7a (MirWalk) TNFSF10"/>
    <att type="string" name="interaction" value="MirWalk" cy:editable="false"/>
    <att type="integer" name="miRDB" value="1"/>
    <att type="integer" name="miRWalk" value="1"/>
    <att type="integer" name="miRanda" value="1"/>
    <graphics width="1" fill="#333333"/>
  </edge>
  <edge label="hsa-let-7a (MirWalk) IL8" source="-31" target="-32">
    <att type="integer" name="DIANAmT" value="1"/>
    <att type="integer" name="PICTAR4" value="1"/>
    <att type="integer" name="PICTAR5" value="0"/>
    <att type="integer" name="PITA" value="1"/>
    <att type="integer" name="RNA22" value="0"/>
    <att type="integer" name="RNAhybrid" value="0"/>
    <att type="integer" name="Sum" value="6"/>
    <att type="integer" name="Targetscan" value="1"/>
    <att type="string" name="canonicalName" value="hsa-let-7a (MirWalk) IL8"/>
    <att type="string" name="interaction" value="MirWalk" cy:editable="false"/>
    <att type="integer" name="miRDB" value="0"/>
    <att type="integer" name="miRWalk" value="1"/>
    <att type="integer" name="miRanda" value="1"/>
    <graphics width="1" fill="#333333"/>
  </edge>
  <edge label="hsa-miR-708 (MirWalk) XAF1" source="-25" target="-30">
    <att type="integer" name="DIANAmT" value="1"/>
    <att type="integer" name="PICTAR4" value="0"/>
    <att type="integer" name="PICTAR5" value="0"/>
    <att type="integer" name="PITA" value="1"/>
    <att type="integer" name="RNA22" value="0"/>
    <att type="integer" name="RNAhybrid" value="0"/>
    <att type="integer" name="Sum" value="6"/>
    <att type="integer" name="Targetscan" value="1"/>
    <att type="string" name="canonicalName" value="hsa-miR-708 (MirWalk) XAF1"/>
    <att type="string" name="interaction" value="MirWalk" cy:editable="false"/>
    <att type="integer" name="miRDB" value="1"/>
    <att type="integer" name="miRWalk" value="1"/>
    <att type="integer" name="miRanda" value="1"/>
    <graphics width="1" fill="#333333"/>
  </edge>
  <edge label="hsa-miR-708 (MirWalk) CD38" source="-25" target="-29">
    <att type="integer" name="DIANAmT" value="1"/>
    <att type="integer" name="PICTAR4" value="0"/>
    <att type="integer" name="PICTAR5" value="0"/>
    <att type="integer" name="PITA" value="1"/>
    <att type="integer" name="RNA22" value="0"/>
    <att type="integer" name="RNAhybrid" value="0"/>
    <att type="integer" name="Sum" value="5"/>
    <att type="integer" name="Targetscan" value="1"/>
    <att type="string" name="canonicalName" value="hsa-miR-708 (MirWalk) CD38"/>
    <att type="string" name="interaction" value="MirWalk" cy:editable="false"/>
    <att type="integer" name="miRDB" value="0"/>
    <att type="integer" name="miRWalk" value="1"/>
    <att type="integer" name="miRanda" value="1"/>
    <graphics width="1" fill="#333333"/>
  </edge>
  <edge label="hsa-miR-708 (MirWalk) DDX60L" source="-25" target="-28">
    <att type="integer" name="DIANAmT" value="1"/>
    <att type="integer" name="PICTAR4" value="0"/>
    <att type="integer" name="PICTAR5" value="0"/>
    <att type="integer" name="PITA" value="1"/>
    <att type="integer" name="RNA22" value="0"/>
    <att type="integer" name="RNAhybrid" value="0"/>
    <att type="integer" name="Sum" value="5"/>
    <att type="integer" name="Targetscan" value="1"/>
    <att type="string" name="canonicalName" value="hsa-miR-708 (MirWalk) DDX60L"/>
    <att type="string" name="interaction" value="MirWalk" cy:editable="false"/>
    <att type="integer" name="miRDB" value="0"/>
    <att type="integer" name="miRWalk" value="1"/>
    <att type="integer" name="miRanda" value="1"/>
    <graphics width="1" fill="#333333"/>
  </edge>
  <edge label="hsa-miR-708 (MirWalk) SIGLEC1" source="-25" target="-15">
    <att type="integer" name="DIANAmT" value="1"/>
    <att type="integer" name="PICTAR4" value="0"/>
    <att type="integer" name="PICTAR5" value="0"/>
    <att type="integer" name="PITA" value="1"/>
    <att type="integer" name="RNA22" value="0"/>
    <att type="integer" name="RNAhybrid" value="0"/>
    <att type="integer" name="Sum" value="5"/>
    <att type="integer" name="Targetscan" value="1"/>
    <att type="string" name="canonicalName" value="hsa-miR-708 (MirWalk) SIGLEC1"/>
    <att type="string" name="interaction" value="MirWalk" cy:editable="false"/>
    <att type="integer" name="miRDB" value="0"/>
    <att type="integer" name="miRWalk" value="1"/>
    <att type="integer" name="miRanda" value="1"/>
    <graphics width="1" fill="#333333"/>
  </edge>
  <edge label="hsa-miR-708 (MirWalk) IFIT5" source="-25" target="-27">
    <att type="integer" name="DIANAmT" value="1"/>
    <att type="integer" name="PICTAR4" value="0"/>
    <att type="integer" name="PICTAR5" value="0"/>
    <att type="integer" name="PITA" value="1"/>
    <att type="integer" name="RNA22" value="0"/>
    <att type="integer" name="RNAhybrid" value="0"/>
    <att type="integer" name="Sum" value="5"/>
    <att type="integer" name="Targetscan" value="1"/>
    <att type="string" name="canonicalName" value="hsa-miR-708 (MirWalk) IFIT5"/>
    <att type="string" name="interaction" value="MirWalk" cy:editable="false"/>
    <att type="integer" name="miRDB" value="0"/>
    <att type="integer" name="miRWalk" value="1"/>
    <att type="integer" name="miRanda" value="1"/>
    <graphics width="1" fill="#333333"/>
  </edge>
  <edge label="hsa-miR-708 (MirWalk) SESN1" source="-25" target="-26">
    <att type="integer" name="DIANAmT" value="1"/>
    <att type="integer" name="PICTAR4" value="0"/>
    <att type="integer" name="PICTAR5" value="0"/>
    <att type="integer" name="PITA" value="1"/>
    <att type="integer" name="RNA22" value="0"/>
    <att type="integer" name="RNAhybrid" value="0"/>
    <att type="integer" name="Sum" value="6"/>
    <att type="integer" name="Targetscan" value="1"/>
    <att type="string" name="canonicalName" value="hsa-miR-708 (MirWalk) SESN1"/>
    <att type="string" name="interaction" value="MirWalk" cy:editable="false"/>
    <att type="integer" name="miRDB" value="1"/>
    <att type="integer" name="miRWalk" value="1"/>
    <att type="integer" name="miRanda" value="1"/>
    <graphics width="1" fill="#333333"/>
  </edge>
  <edge label="hsa-miR-532-5p (MirWalk) CD83" source="-19" target="-24">
    <att type="integer" name="DIANAmT" value="1"/>
    <att type="integer" name="PICTAR4" value="0"/>
    <att type="integer" name="PICTAR5" value="0"/>
    <att type="integer" name="PITA" value="1"/>
    <att type="integer" name="RNA22" value="0"/>
    <att type="integer" name="RNAhybrid" value="0"/>
    <att type="integer" name="Sum" value="5"/>
    <att type="integer" name="Targetscan" value="1"/>
    <att type="string" name="canonicalName" value="hsa-miR-532-5p (MirWalk) CD83"/>
    <att type="string" name="interaction" value="MirWalk" cy:editable="false"/>
    <att type="integer" name="miRDB" value="0"/>
    <att type="integer" name="miRWalk" value="1"/>
    <att type="integer" name="miRanda" value="1"/>
    <graphics width="1" fill="#333333"/>
  </edge>
  <edge label="hsa-miR-532-5p (MirWalk) RSAD2" source="-19" target="-8">
    <att type="integer" name="DIANAmT" value="1"/>
    <att type="integer" name="PICTAR4" value="0"/>
    <att type="integer" name="PICTAR5" value="0"/>
    <att type="integer" name="PITA" value="1"/>
    <att type="integer" name="RNA22" value="0"/>
    <att type="integer" name="RNAhybrid" value="0"/>
    <att type="integer" name="Sum" value="5"/>
    <att type="integer" name="Targetscan" value="1"/>
    <att type="string" name="canonicalName" value="hsa-miR-532-5p (MirWalk) RSAD2"/>
    <att type="string" name="interaction" value="MirWalk" cy:editable="false"/>
    <att type="integer" name="miRDB" value="0"/>
    <att type="integer" name="miRWalk" value="1"/>
    <att type="integer" name="miRanda" value="1"/>
    <graphics width="1" fill="#333333"/>
  </edge>
  <edge label="hsa-miR-532-5p (MirWalk) SIGLEC1" source="-19" target="-15">
    <att type="integer" name="DIANAmT" value="1"/>
    <att type="integer" name="PICTAR4" value="0"/>
    <att type="integer" name="PICTAR5" value="0"/>
    <att type="integer" name="PITA" value="1"/>
    <att type="integer" name="RNA22" value="0"/>
    <att type="integer" name="RNAhybrid" value="0"/>
    <att type="integer" name="Sum" value="5"/>
    <att type="integer" name="Targetscan" value="1"/>
    <att type="string" name="canonicalName" value="hsa-miR-532-5p (MirWalk) SIGLEC1"/>
    <att type="string" name="interaction" value="MirWalk" cy:editable="false"/>
    <att type="integer" name="miRDB" value="0"/>
    <att type="integer" name="miRWalk" value="1"/>
    <att type="integer" name="miRanda" value="1"/>
    <graphics width="1" fill="#333333"/>
  </edge>
  <edge label="hsa-miR-532-5p (MirWalk) MS4A4A" source="-19" target="-23">
    <att type="integer" name="DIANAmT" value="1"/>
    <att type="integer" name="PICTAR4" value="0"/>
    <att type="integer" name="PICTAR5" value="0"/>
    <att type="integer" name="PITA" value="1"/>
    <att type="integer" name="RNA22" value="0"/>
    <att type="integer" name="RNAhybrid" value="0"/>
    <att type="integer" name="Sum" value="6"/>
    <att type="integer" name="Targetscan" value="1"/>
    <att type="string" name="canonicalName" value="hsa-miR-532-5p (MirWalk) MS4A4A"/>
    <att type="string" name="interaction" value="MirWalk" cy:editable="false"/>
    <att type="integer" name="miRDB" value="1"/>
    <att type="integer" name="miRWalk" value="1"/>
    <att type="integer" name="miRanda" value="1"/>
    <graphics width="1" fill="#333333"/>
  </edge>
  <edge label="hsa-miR-532-5p (MirWalk) SH3BGRL2" source="-19" target="-2">
    <att type="integer" name="DIANAmT" value="1"/>
    <att type="integer" name="PICTAR4" value="0"/>
    <att type="integer" name="PICTAR5" value="0"/>
    <att type="integer" name="PITA" value="1"/>
    <att type="integer" name="RNA22" value="0"/>
    <att type="integer" name="RNAhybrid" value="0"/>
    <att type="integer" name="Sum" value="5"/>
    <att type="integer" name="Targetscan" value="1"/>
    <att type="string" name="canonicalName" value="hsa-miR-532-5p (MirWalk) SH3BGRL2"/>
    <att type="string" name="interaction" value="MirWalk" cy:editable="false"/>
    <att type="integer" name="miRDB" value="0"/>
    <att type="integer" name="miRWalk" value="1"/>
    <att type="integer" name="miRanda" value="1"/>
    <graphics width="1" fill="#333333"/>
  </edge>
  <edge label="hsa-miR-532-5p (MirWalk) CMPK2" source="-19" target="-6">
    <att type="integer" name="DIANAmT" value="1"/>
    <att type="integer" name="PICTAR4" value="0"/>
    <att type="integer" name="PICTAR5" value="0"/>
    <att type="integer" name="PITA" value="1"/>
    <att type="integer" name="RNA22" value="0"/>
    <att type="integer" name="RNAhybrid" value="0"/>
    <att type="integer" name="Sum" value="5"/>
    <att type="integer" name="Targetscan" value="1"/>
    <att type="string" name="canonicalName" value="hsa-miR-532-5p (MirWalk) CMPK2"/>
    <att type="string" name="interaction" value="MirWalk" cy:editable="false"/>
    <att type="integer" name="miRDB" value="0"/>
    <att type="integer" name="miRWalk" value="1"/>
    <att type="integer" name="miRanda" value="1"/>
    <graphics width="1" fill="#333333"/>
  </edge>
  <edge label="hsa-miR-532-5p (MirWalk) TRIM22" source="-19" target="-22">
    <att type="integer" name="DIANAmT" value="1"/>
    <att type="integer" name="PICTAR4" value="0"/>
    <att type="integer" name="PICTAR5" value="0"/>
    <att type="integer" name="PITA" value="1"/>
    <att type="integer" name="RNA22" value="0"/>
    <att type="integer" name="RNAhybrid" value="0"/>
    <att type="integer" name="Sum" value="5"/>
    <att type="integer" name="Targetscan" value="1"/>
    <att type="string" name="canonicalName" value="hsa-miR-532-5p (MirWalk) TRIM22"/>
    <att type="string" name="interaction" value="MirWalk" cy:editable="false"/>
    <att type="integer" name="miRDB" value="0"/>
    <att type="integer" name="miRWalk" value="1"/>
    <att type="integer" name="miRanda" value="1"/>
    <graphics width="1" fill="#333333"/>
  </edge>
  <edge label="hsa-miR-532-5p (MirWalk) GBP1" source="-19" target="-21">
    <att type="integer" name="DIANAmT" value="1"/>
    <att type="integer" name="PICTAR4" value="0"/>
    <att type="integer" name="PICTAR5" value="0"/>
    <att type="integer" name="PITA" value="1"/>
    <att type="integer" name="RNA22" value="0"/>
    <att type="integer" name="RNAhybrid" value="0"/>
    <att type="integer" name="Sum" value="6"/>
    <att type="integer" name="Targetscan" value="1"/>
    <att type="string" name="canonicalName" value="hsa-miR-532-5p (MirWalk) GBP1"/>
    <att type="string" name="interaction" value="MirWalk" cy:editable="false"/>
    <att type="integer" name="miRDB" value="1"/>
    <att type="integer" name="miRWalk" value="1"/>
    <att type="integer" name="miRanda" value="1"/>
    <graphics width="1" fill="#333333"/>
  </edge>
  <edge label="hsa-miR-532-5p (MirWalk) STAT1" source="-19" target="-20">
    <att type="integer" name="DIANAmT" value="1"/>
    <att type="integer" name="PICTAR4" value="0"/>
    <att type="integer" name="PICTAR5" value="0"/>
    <att type="integer" name="PITA" value="1"/>
    <att type="integer" name="RNA22" value="0"/>
    <att type="integer" name="RNAhybrid" value="0"/>
    <att type="integer" name="Sum" value="6"/>
    <att type="integer" name="Targetscan" value="1"/>
    <att type="string" name="canonicalName" value="hsa-miR-532-5p (MirWalk) STAT1"/>
    <att type="string" name="interaction" value="MirWalk" cy:editable="false"/>
    <att type="integer" name="miRDB" value="1"/>
    <att type="integer" name="miRWalk" value="1"/>
    <att type="integer" name="miRanda" value="1"/>
    <graphics width="1" fill="#333333"/>
  </edge>
  <edge label="hsa-miR-193a-5p (MirWalk) ITGAE" source="-16" target="-18">
    <att type="integer" name="DIANAmT" value="1"/>
    <att type="integer" name="PICTAR4" value="0"/>
    <att type="integer" name="PICTAR5" value="0"/>
    <att type="integer" name="PITA" value="1"/>
    <att type="integer" name="RNA22" value="0"/>
    <att type="integer" name="RNAhybrid" value="0"/>
    <att type="integer" name="Sum" value="5"/>
    <att type="integer" name="Targetscan" value="1"/>
    <att type="string" name="canonicalName" value="hsa-miR-193a-5p (MirWalk) ITGAE"/>
    <att type="string" name="interaction" value="MirWalk" cy:editable="false"/>
    <att type="integer" name="miRDB" value="0"/>
    <att type="integer" name="miRWalk" value="1"/>
    <att type="integer" name="miRanda" value="1"/>
    <graphics width="1" fill="#333333"/>
  </edge>
  <edge label="hsa-miR-193a-5p (MirWalk) TUBA1A" source="-16" target="-17">
    <att type="integer" name="DIANAmT" value="1"/>
    <att type="integer" name="PICTAR4" value="0"/>
    <att type="integer" name="PICTAR5" value="0"/>
    <att type="integer" name="PITA" value="1"/>
    <att type="integer" name="RNA22" value="0"/>
    <att type="integer" name="RNAhybrid" value="0"/>
    <att type="integer" name="Sum" value="5"/>
    <att type="integer" name="Targetscan" value="1"/>
    <att type="string" name="canonicalName" value="hsa-miR-193a-5p (MirWalk) TUBA1A"/>
    <att type="string" name="interaction" value="MirWalk" cy:editable="false"/>
    <att type="integer" name="miRDB" value="0"/>
    <att type="integer" name="miRWalk" value="1"/>
    <att type="integer" name="miRanda" value="1"/>
    <graphics width="1" fill="#333333"/>
  </edge>
  <edge label="hsa-miR-149 (MirWalk) SH3BGRL2" source="-10" target="-2">
    <att type="integer" name="DIANAmT" value="1"/>
    <att type="integer" name="PICTAR4" value="0"/>
    <att type="integer" name="PICTAR5" value="0"/>
    <att type="integer" name="PITA" value="1"/>
    <att type="integer" name="RNA22" value="0"/>
    <att type="integer" name="RNAhybrid" value="0"/>
    <att type="integer" name="Sum" value="5"/>
    <att type="integer" name="Targetscan" value="1"/>
    <att type="string" name="canonicalName" value="hsa-miR-149 (MirWalk) SH3BGRL2"/>
    <att type="string" name="interaction" value="MirWalk" cy:editable="false"/>
    <att type="integer" name="miRDB" value="0"/>
    <att type="integer" name="miRWalk" value="1"/>
    <att type="integer" name="miRanda" value="1"/>
    <graphics width="1" fill="#333333"/>
  </edge>
  <edge label="hsa-miR-149 (MirWalk) SIGLEC1" source="-10" target="-15">
    <att type="integer" name="DIANAmT" value="1"/>
    <att type="integer" name="PICTAR4" value="0"/>
    <att type="integer" name="PICTAR5" value="0"/>
    <att type="integer" name="PITA" value="1"/>
    <att type="integer" name="RNA22" value="0"/>
    <att type="integer" name="RNAhybrid" value="0"/>
    <att type="integer" name="Sum" value="5"/>
    <att type="integer" name="Targetscan" value="1"/>
    <att type="string" name="canonicalName" value="hsa-miR-149 (MirWalk) SIGLEC1"/>
    <att type="string" name="interaction" value="MirWalk" cy:editable="false"/>
    <att type="integer" name="miRDB" value="0"/>
    <att type="integer" name="miRWalk" value="1"/>
    <att type="integer" name="miRanda" value="1"/>
    <graphics width="1" fill="#333333"/>
  </edge>
  <edge label="hsa-miR-149 (MirWalk) OAS3" source="-10" target="-14">
    <att type="integer" name="DIANAmT" value="0"/>
    <att type="integer" name="PICTAR4" value="0"/>
    <att type="integer" name="PICTAR5" value="0"/>
    <att type="integer" name="PITA" value="1"/>
    <att type="integer" name="RNA22" value="0"/>
    <att type="integer" name="RNAhybrid" value="0"/>
    <att type="integer" name="Sum" value="5"/>
    <att type="integer" name="Targetscan" value="1"/>
    <att type="string" name="canonicalName" value="hsa-miR-149 (MirWalk) OAS3"/>
    <att type="string" name="interaction" value="MirWalk" cy:editable="false"/>
    <att type="integer" name="miRDB" value="1"/>
    <att type="integer" name="miRWalk" value="1"/>
    <att type="integer" name="miRanda" value="1"/>
    <graphics width="1" fill="#333333"/>
  </edge>
  <edge label="hsa-miR-149 (MirWalk) IL1B" source="-10" target="-13">
    <att type="integer" name="DIANAmT" value="1"/>
    <att type="integer" name="PICTAR4" value="0"/>
    <att type="integer" name="PICTAR5" value="0"/>
    <att type="integer" name="PITA" value="1"/>
    <att type="integer" name="RNA22" value="0"/>
    <att type="integer" name="RNAhybrid" value="0"/>
    <att type="integer" name="Sum" value="5"/>
    <att type="integer" name="Targetscan" value="1"/>
    <att type="string" name="canonicalName" value="hsa-miR-149 (MirWalk) IL1B"/>
    <att type="string" name="interaction" value="MirWalk" cy:editable="false"/>
    <att type="integer" name="miRDB" value="0"/>
    <att type="integer" name="miRWalk" value="1"/>
    <att type="integer" name="miRanda" value="1"/>
    <graphics width="1" fill="#333333"/>
  </edge>
  <edge label="hsa-miR-149 (MirWalk) SAMD9L" source="-10" target="-12">
    <att type="integer" name="DIANAmT" value="1"/>
    <att type="integer" name="PICTAR4" value="0"/>
    <att type="integer" name="PICTAR5" value="0"/>
    <att type="integer" name="PITA" value="1"/>
    <att type="integer" name="RNA22" value="0"/>
    <att type="integer" name="RNAhybrid" value="0"/>
    <att type="integer" name="Sum" value="5"/>
    <att type="integer" name="Targetscan" value="1"/>
    <att type="string" name="canonicalName" value="hsa-miR-149 (MirWalk) SAMD9L"/>
    <att type="string" name="interaction" value="MirWalk" cy:editable="false"/>
    <att type="integer" name="miRDB" value="0"/>
    <att type="integer" name="miRWalk" value="1"/>
    <att type="integer" name="miRanda" value="1"/>
    <graphics width="1" fill="#333333"/>
  </edge>
  <edge label="hsa-miR-149 (MirWalk) ANKRD22" source="-10" target="-4">
    <att type="integer" name="DIANAmT" value="0"/>
    <att type="integer" name="PICTAR4" value="0"/>
    <att type="integer" name="PICTAR5" value="0"/>
    <att type="integer" name="PITA" value="1"/>
    <att type="integer" name="RNA22" value="0"/>
    <att type="integer" name="RNAhybrid" value="0"/>
    <att type="integer" name="Sum" value="5"/>
    <att type="integer" name="Targetscan" value="1"/>
    <att type="string" name="canonicalName" value="hsa-miR-149 (MirWalk) ANKRD22"/>
    <att type="string" name="interaction" value="MirWalk" cy:editable="false"/>
    <att type="integer" name="miRDB" value="1"/>
    <att type="integer" name="miRWalk" value="1"/>
    <att type="integer" name="miRanda" value="1"/>
    <graphics width="1" fill="#333333"/>
  </edge>
  <edge label="hsa-miR-149 (MirWalk) PAX5" source="-10" target="-3">
    <att type="integer" name="DIANAmT" value="1"/>
    <att type="integer" name="PICTAR4" value="0"/>
    <att type="integer" name="PICTAR5" value="0"/>
    <att type="integer" name="PITA" value="1"/>
    <att type="integer" name="RNA22" value="1"/>
    <att type="integer" name="RNAhybrid" value="0"/>
    <att type="integer" name="Sum" value="6"/>
    <att type="integer" name="Targetscan" value="1"/>
    <att type="string" name="canonicalName" value="hsa-miR-149 (MirWalk) PAX5"/>
    <att type="string" name="interaction" value="MirWalk" cy:editable="false"/>
    <att type="integer" name="miRDB" value="0"/>
    <att type="integer" name="miRWalk" value="1"/>
    <att type="integer" name="miRanda" value="1"/>
    <graphics width="1" fill="#333333"/>
  </edge>
  <edge label="hsa-miR-149 (MirWalk) FKBP5" source="-10" target="-11">
    <att type="integer" name="DIANAmT" value="1"/>
    <att type="integer" name="PICTAR4" value="0"/>
    <att type="integer" name="PICTAR5" value="0"/>
    <att type="integer" name="PITA" value="1"/>
    <att type="integer" name="RNA22" value="1"/>
    <att type="integer" name="RNAhybrid" value="0"/>
    <att type="integer" name="Sum" value="6"/>
    <att type="integer" name="Targetscan" value="1"/>
    <att type="string" name="canonicalName" value="hsa-miR-149 (MirWalk) FKBP5"/>
    <att type="string" name="interaction" value="MirWalk" cy:editable="false"/>
    <att type="integer" name="miRDB" value="0"/>
    <att type="integer" name="miRWalk" value="1"/>
    <att type="integer" name="miRanda" value="1"/>
    <graphics width="1" fill="#333333"/>
  </edge>
  <edge label="hsa-miR-760 (MirWalk) TSC22D3" source="-5" target="-9">
    <att type="integer" name="DIANAmT" value="1"/>
    <att type="integer" name="PICTAR4" value="0"/>
    <att type="integer" name="PICTAR5" value="0"/>
    <att type="integer" name="PITA" value="1"/>
    <att type="integer" name="RNA22" value="0"/>
    <att type="integer" name="RNAhybrid" value="0"/>
    <att type="integer" name="Sum" value="5"/>
    <att type="integer" name="Targetscan" value="1"/>
    <att type="string" name="canonicalName" value="hsa-miR-760 (MirWalk) TSC22D3"/>
    <att type="string" name="interaction" value="MirWalk" cy:editable="false"/>
    <att type="integer" name="miRDB" value="0"/>
    <att type="integer" name="miRWalk" value="1"/>
    <att type="integer" name="miRanda" value="1"/>
    <graphics width="1" fill="#333333"/>
  </edge>
  <edge label="hsa-miR-760 (MirWalk) RSAD2" source="-5" target="-8">
    <att type="integer" name="DIANAmT" value="1"/>
    <att type="integer" name="PICTAR4" value="0"/>
    <att type="integer" name="PICTAR5" value="0"/>
    <att type="integer" name="PITA" value="1"/>
    <att type="integer" name="RNA22" value="0"/>
    <att type="integer" name="RNAhybrid" value="0"/>
    <att type="integer" name="Sum" value="5"/>
    <att type="integer" name="Targetscan" value="1"/>
    <att type="string" name="canonicalName" value="hsa-miR-760 (MirWalk) RSAD2"/>
    <att type="string" name="interaction" value="MirWalk" cy:editable="false"/>
    <att type="integer" name="miRDB" value="0"/>
    <att type="integer" name="miRWalk" value="1"/>
    <att type="integer" name="miRanda" value="1"/>
    <graphics width="1" fill="#333333"/>
  </edge>
  <edge label="hsa-miR-760 (MirWalk) MX1" source="-5" target="-7">
    <att type="integer" name="DIANAmT" value="1"/>
    <att type="integer" name="PICTAR4" value="0"/>
    <att type="integer" name="PICTAR5" value="0"/>
    <att type="integer" name="PITA" value="1"/>
    <att type="integer" name="RNA22" value="0"/>
    <att type="integer" name="RNAhybrid" value="0"/>
    <att type="integer" name="Sum" value="5"/>
    <att type="integer" name="Targetscan" value="1"/>
    <att type="string" name="canonicalName" value="hsa-miR-760 (MirWalk) MX1"/>
    <att type="string" name="interaction" value="MirWalk" cy:editable="false"/>
    <att type="integer" name="miRDB" value="0"/>
    <att type="integer" name="miRWalk" value="1"/>
    <att type="integer" name="miRanda" value="1"/>
    <graphics width="1" fill="#333333"/>
  </edge>
  <edge label="hsa-miR-760 (MirWalk) CMPK2" source="-5" target="-6">
    <att type="integer" name="DIANAmT" value="1"/>
    <att type="integer" name="PICTAR4" value="0"/>
    <att type="integer" name="PICTAR5" value="0"/>
    <att type="integer" name="PITA" value="1"/>
    <att type="integer" name="RNA22" value="0"/>
    <att type="integer" name="RNAhybrid" value="0"/>
    <att type="integer" name="Sum" value="6"/>
    <att type="integer" name="Targetscan" value="1"/>
    <att type="string" name="canonicalName" value="hsa-miR-760 (MirWalk) CMPK2"/>
    <att type="string" name="interaction" value="MirWalk" cy:editable="false"/>
    <att type="integer" name="miRDB" value="1"/>
    <att type="integer" name="miRWalk" value="1"/>
    <att type="integer" name="miRanda" value="1"/>
    <graphics width="1" fill="#333333"/>
  </edge>
  <edge label="hsa-miR-874 (MirWalk) ANKRD22" source="-1" target="-4">
    <att type="integer" name="DIANAmT" value="1"/>
    <att type="integer" name="PICTAR4" value="0"/>
    <att type="integer" name="PICTAR5" value="0"/>
    <att type="integer" name="PITA" value="1"/>
    <att type="integer" name="RNA22" value="0"/>
    <att type="integer" name="RNAhybrid" value="0"/>
    <att type="integer" name="Sum" value="5"/>
    <att type="integer" name="Targetscan" value="1"/>
    <att type="string" name="canonicalName" value="hsa-miR-874 (MirWalk) ANKRD22"/>
    <att type="string" name="interaction" value="MirWalk" cy:editable="false"/>
    <att type="integer" name="miRDB" value="0"/>
    <att type="integer" name="miRWalk" value="1"/>
    <att type="integer" name="miRanda" value="1"/>
    <graphics width="1" fill="#333333"/>
  </edge>
  <edge label="hsa-miR-874 (MirWalk) PAX5" source="-1" target="-3">
    <att type="integer" name="DIANAmT" value="1"/>
    <att type="integer" name="PICTAR4" value="0"/>
    <att type="integer" name="PICTAR5" value="0"/>
    <att type="integer" name="PITA" value="1"/>
    <att type="integer" name="RNA22" value="0"/>
    <att type="integer" name="RNAhybrid" value="0"/>
    <att type="integer" name="Sum" value="5"/>
    <att type="integer" name="Targetscan" value="1"/>
    <att type="string" name="canonicalName" value="hsa-miR-874 (MirWalk) PAX5"/>
    <att type="string" name="interaction" value="MirWalk" cy:editable="false"/>
    <att type="integer" name="miRDB" value="0"/>
    <att type="integer" name="miRWalk" value="1"/>
    <att type="integer" name="miRanda" value="1"/>
    <graphics width="1" fill="#333333"/>
  </edge>
  <edge label="hsa-miR-874 (MirWalk) SH3BGRL2" source="-1" target="-2">
    <att type="integer" name="DIANAmT" value="1"/>
    <att type="integer" name="PICTAR4" value="0"/>
    <att type="integer" name="PICTAR5" value="0"/>
    <att type="integer" name="PITA" value="1"/>
    <att type="integer" name="RNA22" value="0"/>
    <att type="integer" name="RNAhybrid" value="0"/>
    <att type="integer" name="Sum" value="5"/>
    <att type="integer" name="Targetscan" value="1"/>
    <att type="string" name="canonicalName" value="hsa-miR-874 (MirWalk) SH3BGRL2"/>
    <att type="string" name="interaction" value="MirWalk" cy:editable="false"/>
    <att type="integer" name="miRDB" value="0"/>
    <att type="integer" name="miRWalk" value="1"/>
    <att type="integer" name="miRanda" value="1"/>
    <graphics width="1" fill="#333333"/>
  </edge>
</graph>
