# Supplementary material for: MicroRNA Expression Changes during Interferon-Beta Treatment in the Peripheral Blood of Multiple Sclerosis Patients
Source: MDPI journal article supplement (doi:10.3390/ijms140816087), 2013-08-05
Supplement: s5 [file s5 › CytoscapeSession-2013_05_28-11_16/images/image_metadata.props]

#Image Metadata
#Tue May 28 11:16:04 CEST 2013
1=cytoscape.visual.customgraphic.NullCustomGraphics
