# Supplementary material
Source: MDPI journal article supplement (https://www.mdpi.com/1422-0067/14/8/16087)
Supplement: s5 [file s5 › CytoscapeSession-2013_05_28-11_16/plugins/CsFilter/old_filters.props]

0	class filter.cytoscape.SelectAllFilter	[ No Filter ]
