# Supplementary material for: MicroRNA Expression Changes during Interferon-Beta Treatment in the Peripheral Blood of Multiple Sclerosis Patients
Source: MDPI journal article supplement (doi:10.3390/ijms140816087), 2013-08-05
Supplement: s5 [file s5 › CytoscapeSession-2013_05_28-11_16/plugins/ExprEssence/attributeBrowser.props]

#Cytoscape Attribute Browser Plugin Properties
#Tue May 28 11:16:03 CEST 2013
attributeBrowser.node.selectedAttr0002=Type\t75
attributeBrowser.node.selectedAttr0001=Total\t75
attributeBrowser.node.selectedAttr0000=ID\t171
attributeBrowser.network.selectedAttr0001=Value\t69
attributeBrowser.network.selectedAttr0000=Network Attribute Name\t184
attributeBrowser.edge.selectedAttr0001=Sum\t75
attributeBrowser.edge.selectedAttr0000=ID\t75
