# Supplementary material for: MicroRNA Expression Changes during Interferon-Beta Treatment in the Peripheral Blood of Multiple Sclerosis Patients
Source: MDPI journal article supplement (doi:10.3390/ijms140816087), 2013-08-05
Supplement: s5 [file s5 › CytoscapeSession-2013_05_28-11_16/plugins/ExprEssence/condensedNetworks.props]

#Expressence Plugin Properties
#Tue May 28 11:16:03 CEST 2013
numberOfNetworks=0
networkPrefixNumberEnumerator=0
