# Supplementary material for: MicroRNA Expression Changes during Interferon-Beta Treatment in the Peripheral Blood of Multiple Sclerosis Patients
Source: MDPI journal article supplement (doi:10.3390/ijms140816087), 2013-08-05
Supplement: s5 [file s5 › CytoscapeSession-2013_05_28-11_16/plugins/FilterPlugin/session_filters.props]

FilterVersion=0.2
<Composite>
name=h
<AdvancedSetting>
scope.global=true
scope.session=true
selection.node=true
selection.edge=true
edge.source=true
edge.target=true
Relation=AND
</AdvancedSetting>
Negation=true
StringFilter=node.shape:true:octagon:0
StringFilter=added by:false::1
StringFilter=MyAttribute1:true:(no4::no5::no6):0
</Composite>
