# Supplementary material for: MicroRNA Expression Changes during Interferon-Beta Treatment in the Peripheral Blood of Multiple Sclerosis Patients
Source: MDPI journal article supplement (doi:10.3390/ijms140816087), 2013-08-05
Supplement: s5 [file s5 › CytoscapeSession-2013_05_28-11_16/session_vizmap.props]

#This file specifies visual mappings for Cytoscape and has been automatically generated.
# WARNING: any changes you make to this file while Cytoscape is running may be overwritten.
# Any changes may make these visual mappings unreadable.
# Please make sure you know what you are doing before modifying this file by hand.
#
#Tue May 28 11:16:03 CEST 2013
edgeAppearanceCalculator.Minimal.defaultEdgeColor=51,51,51
edgeAppearanceCalculator.Minimal.defaultEdgeFont=SanSerif,plain,10
edgeAppearanceCalculator.Minimal.defaultEdgeFontSize=10.0
edgeAppearanceCalculator.Minimal.defaultEdgeLabel=
edgeAppearanceCalculator.Minimal.defaultEdgeLabelColor=0,0,0
edgeAppearanceCalculator.Minimal.defaultEdgeLabelOpacity=255.0
edgeAppearanceCalculator.Minimal.defaultEdgeLabelPosition=C,C,c,0.00,0.00
edgeAppearanceCalculator.Minimal.defaultEdgeLabelWidth=100.0
edgeAppearanceCalculator.Minimal.defaultEdgeLineStyle=SOLID
edgeAppearanceCalculator.Minimal.defaultEdgeLineWidth=4.0
edgeAppearanceCalculator.Minimal.defaultEdgeOpacity=255.0
edgeAppearanceCalculator.Minimal.defaultEdgeSourceArrowColor=0,0,0
edgeAppearanceCalculator.Minimal.defaultEdgeSourceArrowOpacity=255.0
edgeAppearanceCalculator.Minimal.defaultEdgeSourceArrowShape=NONE
edgeAppearanceCalculator.Minimal.defaultEdgeTargetArrowColor=0,0,0
edgeAppearanceCalculator.Minimal.defaultEdgeTargetArrowOpacity=255.0
edgeAppearanceCalculator.Minimal.defaultEdgeTargetArrowShape=NONE
edgeAppearanceCalculator.Minimal.defaultEdgeToolTip=
edgeAppearanceCalculator.Nested\ Network\ Style.defaultEdgeColor=51,51,51
edgeAppearanceCalculator.Nested\ Network\ Style.defaultEdgeFont=SanSerif,plain,10
edgeAppearanceCalculator.Nested\ Network\ Style.defaultEdgeFontSize=10.0
edgeAppearanceCalculator.Nested\ Network\ Style.defaultEdgeLabel=
edgeAppearanceCalculator.Nested\ Network\ Style.defaultEdgeLabelColor=0,0,0
edgeAppearanceCalculator.Nested\ Network\ Style.defaultEdgeLabelOpacity=255.0
edgeAppearanceCalculator.Nested\ Network\ Style.defaultEdgeLabelPosition=C,C,c,0.00,0.00
edgeAppearanceCalculator.Nested\ Network\ Style.defaultEdgeLabelWidth=100.0
edgeAppearanceCalculator.Nested\ Network\ Style.defaultEdgeLineStyle=SOLID
edgeAppearanceCalculator.Nested\ Network\ Style.defaultEdgeLineWidth=2.0
edgeAppearanceCalculator.Nested\ Network\ Style.defaultEdgeOpacity=255.0
edgeAppearanceCalculator.Nested\ Network\ Style.defaultEdgeSourceArrowColor=0,0,0
edgeAppearanceCalculator.Nested\ Network\ Style.defaultEdgeSourceArrowOpacity=255.0
edgeAppearanceCalculator.Nested\ Network\ Style.defaultEdgeSourceArrowShape=NONE
edgeAppearanceCalculator.Nested\ Network\ Style.defaultEdgeTargetArrowColor=0,0,0
edgeAppearanceCalculator.Nested\ Network\ Style.defaultEdgeTargetArrowOpacity=255.0
edgeAppearanceCalculator.Nested\ Network\ Style.defaultEdgeTargetArrowShape=NONE
edgeAppearanceCalculator.Nested\ Network\ Style.defaultEdgeToolTip=
edgeAppearanceCalculator.Nested\ Network\ Style.nodeSizeLocked=true
edgeAppearanceCalculator.Sample1.defaultEdgeColor=0,0,0
edgeAppearanceCalculator.Sample1.defaultEdgeFont=Default,plain,10
edgeAppearanceCalculator.Sample1.defaultEdgeFontSize=10.0
edgeAppearanceCalculator.Sample1.defaultEdgeLabel=
edgeAppearanceCalculator.Sample1.defaultEdgeLabelColor=0,0,0
edgeAppearanceCalculator.Sample1.defaultEdgeLabelOpacity=255.0
edgeAppearanceCalculator.Sample1.defaultEdgeLabelPosition=C,C,c,0.00,0.00
edgeAppearanceCalculator.Sample1.defaultEdgeLabelWidth=100.0
edgeAppearanceCalculator.Sample1.defaultEdgeLineStyle=SOLID
edgeAppearanceCalculator.Sample1.defaultEdgeLineWidth=1.0
edgeAppearanceCalculator.Sample1.defaultEdgeOpacity=255.0
edgeAppearanceCalculator.Sample1.defaultEdgeSourceArrowColor=0,0,0
edgeAppearanceCalculator.Sample1.defaultEdgeSourceArrowOpacity=255.0
edgeAppearanceCalculator.Sample1.defaultEdgeSourceArrowShape=NONE
edgeAppearanceCalculator.Sample1.defaultEdgeTargetArrowColor=0,0,0
edgeAppearanceCalculator.Sample1.defaultEdgeTargetArrowOpacity=255.0
edgeAppearanceCalculator.Sample1.defaultEdgeTargetArrowShape=NONE
edgeAppearanceCalculator.Sample1.defaultEdgeToolTip=
edgeAppearanceCalculator.Sample1.edgeColorCalculator=BasicDiscrete
edgeAppearanceCalculator.Sample1.edgeLabelCalculator=EdgeLabel
edgeAppearanceCalculator.Sample1.edgeLineStyleCalculator=Sample1-Edge Line Style-Discrete Mapper
edgeAppearanceCalculator.Sample1.nodeSizeLocked=true
edgeAppearanceCalculator.Solid.defaultEdgeColor=204,204,204
edgeAppearanceCalculator.Solid.defaultEdgeFont=SanSerif,plain,10
edgeAppearanceCalculator.Solid.defaultEdgeFontSize=10.0
edgeAppearanceCalculator.Solid.defaultEdgeLabel=
edgeAppearanceCalculator.Solid.defaultEdgeLabelColor=102,102,102
edgeAppearanceCalculator.Solid.defaultEdgeLabelOpacity=190.0
edgeAppearanceCalculator.Solid.defaultEdgeLabelPosition=C,C,c,0.00,0.00
edgeAppearanceCalculator.Solid.defaultEdgeLabelWidth=100.0
edgeAppearanceCalculator.Solid.defaultEdgeLineStyle=SOLID
edgeAppearanceCalculator.Solid.defaultEdgeLineWidth=12.0
edgeAppearanceCalculator.Solid.defaultEdgeOpacity=255.0
edgeAppearanceCalculator.Solid.defaultEdgeSourceArrowColor=0,0,0
edgeAppearanceCalculator.Solid.defaultEdgeSourceArrowOpacity=255.0
edgeAppearanceCalculator.Solid.defaultEdgeSourceArrowShape=NONE
edgeAppearanceCalculator.Solid.defaultEdgeTargetArrowColor=0,0,0
edgeAppearanceCalculator.Solid.defaultEdgeTargetArrowOpacity=255.0
edgeAppearanceCalculator.Solid.defaultEdgeTargetArrowShape=NONE
edgeAppearanceCalculator.Solid.defaultEdgeToolTip=
edgeAppearanceCalculator.Solid.edgeLabelCalculator=Solid-Edge Label-Passthrough Mapper
edgeAppearanceCalculator.Solid.nodeSizeLocked=true
edgeAppearanceCalculator.Universe.defaultEdgeColor=255,255,255
edgeAppearanceCalculator.Universe.defaultEdgeFont=SanSerif,plain,10
edgeAppearanceCalculator.Universe.defaultEdgeFontSize=10.0
edgeAppearanceCalculator.Universe.defaultEdgeLabel=
edgeAppearanceCalculator.Universe.defaultEdgeLabelColor=0,0,0
edgeAppearanceCalculator.Universe.defaultEdgeLabelOpacity=255.0
edgeAppearanceCalculator.Universe.defaultEdgeLabelPosition=C,C,c,0.00,0.00
edgeAppearanceCalculator.Universe.defaultEdgeLabelWidth=100.0
edgeAppearanceCalculator.Universe.defaultEdgeLineStyle=LONG_DASH
edgeAppearanceCalculator.Universe.defaultEdgeLineWidth=3.0
edgeAppearanceCalculator.Universe.defaultEdgeOpacity=100.0
edgeAppearanceCalculator.Universe.defaultEdgeSourceArrowColor=0,0,0
edgeAppearanceCalculator.Universe.defaultEdgeSourceArrowOpacity=255.0
edgeAppearanceCalculator.Universe.defaultEdgeSourceArrowShape=NONE
edgeAppearanceCalculator.Universe.defaultEdgeTargetArrowColor=0,0,0
edgeAppearanceCalculator.Universe.defaultEdgeTargetArrowOpacity=255.0
edgeAppearanceCalculator.Universe.defaultEdgeTargetArrowShape=NONE
edgeAppearanceCalculator.Universe.defaultEdgeToolTip=
edgeAppearanceCalculator.Universe.nodeSizeLocked=true
edgeAppearanceCalculator.default.defaultEdgeColor=0,0,0
edgeAppearanceCalculator.default.defaultEdgeFont=Default,plain,10
edgeAppearanceCalculator.default.defaultEdgeFontSize=10.0
edgeAppearanceCalculator.default.defaultEdgeLabel=
edgeAppearanceCalculator.default.defaultEdgeLabelColor=0,0,0
edgeAppearanceCalculator.default.defaultEdgeLabelOpacity=255.0
edgeAppearanceCalculator.default.defaultEdgeLabelPosition=C,C,c,0.00,0.00
edgeAppearanceCalculator.default.defaultEdgeLabelWidth=100.0
edgeAppearanceCalculator.default.defaultEdgeLineStyle=SOLID
edgeAppearanceCalculator.default.defaultEdgeLineWidth=1.5
edgeAppearanceCalculator.default.defaultEdgeOpacity=150.0
edgeAppearanceCalculator.default.defaultEdgeSourceArrowColor=0,0,0
edgeAppearanceCalculator.default.defaultEdgeSourceArrowOpacity=255.0
edgeAppearanceCalculator.default.defaultEdgeSourceArrowShape=NONE
edgeAppearanceCalculator.default.defaultEdgeTargetArrowColor=0,0,0
edgeAppearanceCalculator.default.defaultEdgeTargetArrowOpacity=150.0
edgeAppearanceCalculator.default.defaultEdgeTargetArrowShape=DELTA
edgeAppearanceCalculator.default.defaultEdgeToolTip=
edgeAppearanceCalculator.default.edgeColorCalculator=default-Edge Color-Discrete Mapper
edgeAppearanceCalculator.default.nodeSizeLocked=true
edgeColorCalculator.BasicDiscrete.mapping.controller=interaction
edgeColorCalculator.BasicDiscrete.mapping.controllerType=4
edgeColorCalculator.BasicDiscrete.mapping.map.pd=255,0,51
edgeColorCalculator.BasicDiscrete.mapping.map.pp=0,204,0
edgeColorCalculator.BasicDiscrete.mapping.type=DiscreteMapping
edgeColorCalculator.BasicDiscrete.visualPropertyType=EDGE_COLOR
edgeColorCalculator.default-Edge\ Color-Discrete\ Mapper.mapping.controller=interaction
edgeColorCalculator.default-Edge\ Color-Discrete\ Mapper.mapping.controllerType=4
edgeColorCalculator.default-Edge\ Color-Discrete\ Mapper.mapping.map.MirTarBase=255,0,255
edgeColorCalculator.default-Edge\ Color-Discrete\ Mapper.mapping.map.MirWalk=51,51,51
edgeColorCalculator.default-Edge\ Color-Discrete\ Mapper.mapping.type=DiscreteMapping
edgeColorCalculator.default-Edge\ Color-Discrete\ Mapper.visualPropertyType=EDGE_COLOR
edgeLabelCalculator.EdgeLabel.mapping.controller=interaction
edgeLabelCalculator.EdgeLabel.mapping.type=PassThroughMapping
edgeLabelCalculator.EdgeLabel.visualPropertyType=EDGE_LABEL
edgeLabelCalculator.Solid-Edge\ Label-Passthrough\ Mapper.mapping.controller=interaction
edgeLabelCalculator.Solid-Edge\ Label-Passthrough\ Mapper.mapping.type=PassThroughMapping
edgeLabelCalculator.Solid-Edge\ Label-Passthrough\ Mapper.visualPropertyType=EDGE_LABEL
edgeLineStyleCalculator.Sample1-Edge\ Line\ Style-Discrete\ Mapper.mapping.controller=interaction
edgeLineStyleCalculator.Sample1-Edge\ Line\ Style-Discrete\ Mapper.mapping.controllerType=4
edgeLineStyleCalculator.Sample1-Edge\ Line\ Style-Discrete\ Mapper.mapping.map.pd=LONG_DASH
edgeLineStyleCalculator.Sample1-Edge\ Line\ Style-Discrete\ Mapper.mapping.map.pp=SOLID
edgeLineStyleCalculator.Sample1-Edge\ Line\ Style-Discrete\ Mapper.mapping.type=DiscreteMapping
edgeLineStyleCalculator.Sample1-Edge\ Line\ Style-Discrete\ Mapper.visualPropertyType=EDGE_LINE_STYLE
globalAppearanceCalculator.Minimal.defaultBackgroundColor=153,153,153
globalAppearanceCalculator.Minimal.defaultEdgeReverseSelectionColor=0,255,0
globalAppearanceCalculator.Minimal.defaultEdgeSelectionColor=255,0,0
globalAppearanceCalculator.Minimal.defaultNodeReverseSelectionColor=0,255,0
globalAppearanceCalculator.Minimal.defaultNodeSelectionColor=255,255,0
globalAppearanceCalculator.Nested\ Network\ Style.defaultBackgroundColor=255,255,255
globalAppearanceCalculator.Nested\ Network\ Style.defaultEdgeReverseSelectionColor=0,255,0
globalAppearanceCalculator.Nested\ Network\ Style.defaultEdgeSelectionColor=255,0,0
globalAppearanceCalculator.Nested\ Network\ Style.defaultNodeReverseSelectionColor=0,255,0
globalAppearanceCalculator.Nested\ Network\ Style.defaultNodeSelectionColor=255,255,0
globalAppearanceCalculator.Sample1.defaultBackgroundColor=255,255,255
globalAppearanceCalculator.Sample1.defaultEdgeReverseSelectionColor=0,255,0
globalAppearanceCalculator.Sample1.defaultEdgeSelectionColor=255,0,0
globalAppearanceCalculator.Sample1.defaultNodeReverseSelectionColor=0,255,0
globalAppearanceCalculator.Sample1.defaultNodeSelectionColor=255,255,0
globalAppearanceCalculator.Solid.defaultBackgroundColor=255,255,255
globalAppearanceCalculator.Solid.defaultEdgeReverseSelectionColor=0,255,0
globalAppearanceCalculator.Solid.defaultEdgeSelectionColor=255,0,0
globalAppearanceCalculator.Solid.defaultNodeReverseSelectionColor=0,255,0
globalAppearanceCalculator.Solid.defaultNodeSelectionColor=255,255,0
globalAppearanceCalculator.Universe.defaultBackgroundColor=0,0,0
globalAppearanceCalculator.Universe.defaultEdgeReverseSelectionColor=0,255,0
globalAppearanceCalculator.Universe.defaultEdgeSelectionColor=255,0,0
globalAppearanceCalculator.Universe.defaultNodeReverseSelectionColor=0,255,0
globalAppearanceCalculator.Universe.defaultNodeSelectionColor=255,255,0
globalAppearanceCalculator.default.defaultBackgroundColor=255,255,255
globalAppearanceCalculator.default.defaultEdgeReverseSelectionColor=0,255,0
globalAppearanceCalculator.default.defaultEdgeSelectionColor=255,0,0
globalAppearanceCalculator.default.defaultNodeReverseSelectionColor=0,255,0
globalAppearanceCalculator.default.defaultNodeSelectionColor=255,255,0
nodeAppearanceCalculator.Minimal.defaultNodeBorderColor=0,0,0
nodeAppearanceCalculator.Minimal.defaultNodeBorderOpacity=255.0
nodeAppearanceCalculator.Minimal.defaultNodeCustomGraphics1=cytoscape.visual.customgraphic.NullCustomGraphics
nodeAppearanceCalculator.Minimal.defaultNodeCustomGraphics2=cytoscape.visual.customgraphic.NullCustomGraphics
nodeAppearanceCalculator.Minimal.defaultNodeCustomGraphics3=cytoscape.visual.customgraphic.NullCustomGraphics
nodeAppearanceCalculator.Minimal.defaultNodeCustomGraphics4=cytoscape.visual.customgraphic.NullCustomGraphics
nodeAppearanceCalculator.Minimal.defaultNodeCustomGraphics5=cytoscape.visual.customgraphic.NullCustomGraphics
nodeAppearanceCalculator.Minimal.defaultNodeCustomGraphics6=cytoscape.visual.customgraphic.NullCustomGraphics
nodeAppearanceCalculator.Minimal.defaultNodeCustomGraphics7=cytoscape.visual.customgraphic.NullCustomGraphics
nodeAppearanceCalculator.Minimal.defaultNodeCustomGraphics8=cytoscape.visual.customgraphic.NullCustomGraphics
nodeAppearanceCalculator.Minimal.defaultNodeCustomGraphics9=cytoscape.visual.customgraphic.NullCustomGraphics
nodeAppearanceCalculator.Minimal.defaultNodeCustomGraphicsPosition1=C,C,c,0.00,0.00
nodeAppearanceCalculator.Minimal.defaultNodeCustomGraphicsPosition2=C,C,c,0.00,0.00
nodeAppearanceCalculator.Minimal.defaultNodeCustomGraphicsPosition3=C,C,c,0.00,0.00
nodeAppearanceCalculator.Minimal.defaultNodeCustomGraphicsPosition4=C,C,c,0.00,0.00
nodeAppearanceCalculator.Minimal.defaultNodeCustomGraphicsPosition5=C,C,c,0.00,0.00
nodeAppearanceCalculator.Minimal.defaultNodeCustomGraphicsPosition6=C,C,c,0.00,0.00
nodeAppearanceCalculator.Minimal.defaultNodeCustomGraphicsPosition7=C,C,c,0.00,0.00
nodeAppearanceCalculator.Minimal.defaultNodeCustomGraphicsPosition8=C,C,c,0.00,0.00
nodeAppearanceCalculator.Minimal.defaultNodeCustomGraphicsPosition9=C,C,c,0.00,0.00
nodeAppearanceCalculator.Minimal.defaultNodeFillColor=255,255,255
nodeAppearanceCalculator.Minimal.defaultNodeFont=Default,plain,12
nodeAppearanceCalculator.Minimal.defaultNodeFontSize=12.0
nodeAppearanceCalculator.Minimal.defaultNodeHight=30.0
nodeAppearanceCalculator.Minimal.defaultNodeLabel=
nodeAppearanceCalculator.Minimal.defaultNodeLabelColor=0,0,0
nodeAppearanceCalculator.Minimal.defaultNodeLabelOpacity=255.0
nodeAppearanceCalculator.Minimal.defaultNodeLabelPosition=C,C,c,0.00,0.00
nodeAppearanceCalculator.Minimal.defaultNodeLabelWidth=100.0
nodeAppearanceCalculator.Minimal.defaultNodeLineStyle=SOLID
nodeAppearanceCalculator.Minimal.defaultNodeLineWidth=0.0
nodeAppearanceCalculator.Minimal.defaultNodeOpacity=255.0
nodeAppearanceCalculator.Minimal.defaultNodeShape=rect
nodeAppearanceCalculator.Minimal.defaultNodeShowNestedNetwork=true
nodeAppearanceCalculator.Minimal.defaultNodeSize=30.0
nodeAppearanceCalculator.Minimal.defaultNodeToolTip=
nodeAppearanceCalculator.Minimal.defaultNodeWidth=70.0
nodeAppearanceCalculator.Nested\ Network\ Style.defaultNodeBorderColor=0,153,0
nodeAppearanceCalculator.Nested\ Network\ Style.defaultNodeBorderOpacity=190.0
nodeAppearanceCalculator.Nested\ Network\ Style.defaultNodeCustomGraphics1=cytoscape.visual.customgraphic.NullCustomGraphics
nodeAppearanceCalculator.Nested\ Network\ Style.defaultNodeCustomGraphics2=cytoscape.visual.customgraphic.NullCustomGraphics
nodeAppearanceCalculator.Nested\ Network\ Style.defaultNodeCustomGraphics3=cytoscape.visual.customgraphic.NullCustomGraphics
nodeAppearanceCalculator.Nested\ Network\ Style.defaultNodeCustomGraphics4=cytoscape.visual.customgraphic.NullCustomGraphics
nodeAppearanceCalculator.Nested\ Network\ Style.defaultNodeCustomGraphics5=cytoscape.visual.customgraphic.NullCustomGraphics
nodeAppearanceCalculator.Nested\ Network\ Style.defaultNodeCustomGraphics6=cytoscape.visual.customgraphic.NullCustomGraphics
nodeAppearanceCalculator.Nested\ Network\ Style.defaultNodeCustomGraphics7=cytoscape.visual.customgraphic.NullCustomGraphics
nodeAppearanceCalculator.Nested\ Network\ Style.defaultNodeCustomGraphics8=cytoscape.visual.customgraphic.NullCustomGraphics
nodeAppearanceCalculator.Nested\ Network\ Style.defaultNodeCustomGraphics9=cytoscape.visual.customgraphic.NullCustomGraphics
nodeAppearanceCalculator.Nested\ Network\ Style.defaultNodeCustomGraphicsPosition1=C,C,c,0.00,0.00
nodeAppearanceCalculator.Nested\ Network\ Style.defaultNodeCustomGraphicsPosition2=C,C,c,0.00,0.00
nodeAppearanceCalculator.Nested\ Network\ Style.defaultNodeCustomGraphicsPosition3=C,C,c,0.00,0.00
nodeAppearanceCalculator.Nested\ Network\ Style.defaultNodeCustomGraphicsPosition4=C,C,c,0.00,0.00
nodeAppearanceCalculator.Nested\ Network\ Style.defaultNodeCustomGraphicsPosition5=C,C,c,0.00,0.00
nodeAppearanceCalculator.Nested\ Network\ Style.defaultNodeCustomGraphicsPosition6=C,C,c,0.00,0.00
nodeAppearanceCalculator.Nested\ Network\ Style.defaultNodeCustomGraphicsPosition7=C,C,c,0.00,0.00
nodeAppearanceCalculator.Nested\ Network\ Style.defaultNodeCustomGraphicsPosition8=C,C,c,0.00,0.00
nodeAppearanceCalculator.Nested\ Network\ Style.defaultNodeCustomGraphicsPosition9=C,C,c,0.00,0.00
nodeAppearanceCalculator.Nested\ Network\ Style.defaultNodeFillColor=153,255,153
nodeAppearanceCalculator.Nested\ Network\ Style.defaultNodeFont=SansSerif,plain,12
nodeAppearanceCalculator.Nested\ Network\ Style.defaultNodeFontSize=13.0
nodeAppearanceCalculator.Nested\ Network\ Style.defaultNodeHight=30.0
nodeAppearanceCalculator.Nested\ Network\ Style.defaultNodeLabel=
nodeAppearanceCalculator.Nested\ Network\ Style.defaultNodeLabelColor=0,0,0
nodeAppearanceCalculator.Nested\ Network\ Style.defaultNodeLabelOpacity=255.0
nodeAppearanceCalculator.Nested\ Network\ Style.defaultNodeLabelPosition=C,C,c,0.00,0.00
nodeAppearanceCalculator.Nested\ Network\ Style.defaultNodeLabelWidth=100.0
nodeAppearanceCalculator.Nested\ Network\ Style.defaultNodeLineStyle=SOLID
nodeAppearanceCalculator.Nested\ Network\ Style.defaultNodeLineWidth=2.0
nodeAppearanceCalculator.Nested\ Network\ Style.defaultNodeOpacity=150.0
nodeAppearanceCalculator.Nested\ Network\ Style.defaultNodeShape=ellipse
nodeAppearanceCalculator.Nested\ Network\ Style.defaultNodeShowNestedNetwork=true
nodeAppearanceCalculator.Nested\ Network\ Style.defaultNodeSize=40.0
nodeAppearanceCalculator.Nested\ Network\ Style.defaultNodeToolTip=
nodeAppearanceCalculator.Nested\ Network\ Style.defaultNodeWidth=70.0
nodeAppearanceCalculator.Nested\ Network\ Style.nodeBorderColorCalculator=Nested Network Style-Node Border Color-Discrete Mapper
nodeAppearanceCalculator.Nested\ Network\ Style.nodeFillColorCalculator=Nested Network Style-Node Color-Discrete Mapper
nodeAppearanceCalculator.Nested\ Network\ Style.nodeLabelCalculator=Nested Network Style-Node Label-Passthrough Mapper
nodeAppearanceCalculator.Nested\ Network\ Style.nodeLabelColor=Nested Network Style-Node Label Color-Discrete Mapper
nodeAppearanceCalculator.Nested\ Network\ Style.nodeLabelPositionCalculator=Nested Network Style-Node Label Position-Discrete Mapper
nodeAppearanceCalculator.Nested\ Network\ Style.nodeLineWidthCalculator=Nested Network Style-Node Line Width-Discrete Mapper
nodeAppearanceCalculator.Nested\ Network\ Style.nodeShapeCalculator=Nested Network Style-Node Shape-Discrete Mapper
nodeAppearanceCalculator.Nested\ Network\ Style.nodeSizeLocked=true
nodeAppearanceCalculator.Nested\ Network\ Style.nodeUniformSizeCalculator=Nested Network Style-Node Size-Discrete Mapper
nodeAppearanceCalculator.Sample1.defaultNodeBorderColor=0,0,0
nodeAppearanceCalculator.Sample1.defaultNodeBorderOpacity=255.0
nodeAppearanceCalculator.Sample1.defaultNodeCustomGraphics1=cytoscape.visual.customgraphic.NullCustomGraphics
nodeAppearanceCalculator.Sample1.defaultNodeCustomGraphics2=cytoscape.visual.customgraphic.NullCustomGraphics
nodeAppearanceCalculator.Sample1.defaultNodeCustomGraphics3=cytoscape.visual.customgraphic.NullCustomGraphics
nodeAppearanceCalculator.Sample1.defaultNodeCustomGraphics4=cytoscape.visual.customgraphic.NullCustomGraphics
nodeAppearanceCalculator.Sample1.defaultNodeCustomGraphics5=cytoscape.visual.customgraphic.NullCustomGraphics
nodeAppearanceCalculator.Sample1.defaultNodeCustomGraphics6=cytoscape.visual.customgraphic.NullCustomGraphics
nodeAppearanceCalculator.Sample1.defaultNodeCustomGraphics7=cytoscape.visual.customgraphic.NullCustomGraphics
nodeAppearanceCalculator.Sample1.defaultNodeCustomGraphics8=cytoscape.visual.customgraphic.NullCustomGraphics
nodeAppearanceCalculator.Sample1.defaultNodeCustomGraphics9=cytoscape.visual.customgraphic.NullCustomGraphics
nodeAppearanceCalculator.Sample1.defaultNodeCustomGraphicsPosition1=C,C,c,0.00,0.00
nodeAppearanceCalculator.Sample1.defaultNodeCustomGraphicsPosition2=C,C,c,0.00,0.00
nodeAppearanceCalculator.Sample1.defaultNodeCustomGraphicsPosition3=C,C,c,0.00,0.00
nodeAppearanceCalculator.Sample1.defaultNodeCustomGraphicsPosition4=C,C,c,0.00,0.00
nodeAppearanceCalculator.Sample1.defaultNodeCustomGraphicsPosition5=C,C,c,0.00,0.00
nodeAppearanceCalculator.Sample1.defaultNodeCustomGraphicsPosition6=C,C,c,0.00,0.00
nodeAppearanceCalculator.Sample1.defaultNodeCustomGraphicsPosition7=C,C,c,0.00,0.00
nodeAppearanceCalculator.Sample1.defaultNodeCustomGraphicsPosition8=C,C,c,0.00,0.00
nodeAppearanceCalculator.Sample1.defaultNodeCustomGraphicsPosition9=C,C,c,0.00,0.00
nodeAppearanceCalculator.Sample1.defaultNodeFillColor=204,204,255
nodeAppearanceCalculator.Sample1.defaultNodeFont=Dialog.bold,plain,12
nodeAppearanceCalculator.Sample1.defaultNodeFontSize=12.0
nodeAppearanceCalculator.Sample1.defaultNodeHight=30.0
nodeAppearanceCalculator.Sample1.defaultNodeLabel=
nodeAppearanceCalculator.Sample1.defaultNodeLabelColor=0,0,0
nodeAppearanceCalculator.Sample1.defaultNodeLabelOpacity=255.0
nodeAppearanceCalculator.Sample1.defaultNodeLabelPosition=C,C,c,0.00,0.00
nodeAppearanceCalculator.Sample1.defaultNodeLabelWidth=100.0
nodeAppearanceCalculator.Sample1.defaultNodeLineStyle=SOLID
nodeAppearanceCalculator.Sample1.defaultNodeLineWidth=0.0
nodeAppearanceCalculator.Sample1.defaultNodeOpacity=255.0
nodeAppearanceCalculator.Sample1.defaultNodeShape=ellipse
nodeAppearanceCalculator.Sample1.defaultNodeShowNestedNetwork=true
nodeAppearanceCalculator.Sample1.defaultNodeSize=40.0
nodeAppearanceCalculator.Sample1.defaultNodeToolTip=
nodeAppearanceCalculator.Sample1.defaultNodeWidth=70.0
nodeAppearanceCalculator.Sample1.nodeLabelCalculator=NodeLabel
nodeAppearanceCalculator.Sample1.nodeSizeLocked=true
nodeAppearanceCalculator.Solid.defaultNodeBorderColor=0,0,0
nodeAppearanceCalculator.Solid.defaultNodeBorderOpacity=255.0
nodeAppearanceCalculator.Solid.defaultNodeCustomGraphics1=cytoscape.visual.customgraphic.NullCustomGraphics
nodeAppearanceCalculator.Solid.defaultNodeCustomGraphics2=cytoscape.visual.customgraphic.NullCustomGraphics
nodeAppearanceCalculator.Solid.defaultNodeCustomGraphics3=cytoscape.visual.customgraphic.NullCustomGraphics
nodeAppearanceCalculator.Solid.defaultNodeCustomGraphics4=cytoscape.visual.customgraphic.NullCustomGraphics
nodeAppearanceCalculator.Solid.defaultNodeCustomGraphics5=cytoscape.visual.customgraphic.NullCustomGraphics
nodeAppearanceCalculator.Solid.defaultNodeCustomGraphics6=cytoscape.visual.customgraphic.NullCustomGraphics
nodeAppearanceCalculator.Solid.defaultNodeCustomGraphics7=cytoscape.visual.customgraphic.NullCustomGraphics
nodeAppearanceCalculator.Solid.defaultNodeCustomGraphics8=cytoscape.visual.customgraphic.NullCustomGraphics
nodeAppearanceCalculator.Solid.defaultNodeCustomGraphics9=cytoscape.visual.customgraphic.NullCustomGraphics
nodeAppearanceCalculator.Solid.defaultNodeCustomGraphicsPosition1=C,C,c,0.00,0.00
nodeAppearanceCalculator.Solid.defaultNodeCustomGraphicsPosition2=C,C,c,0.00,0.00
nodeAppearanceCalculator.Solid.defaultNodeCustomGraphicsPosition3=C,C,c,0.00,0.00
nodeAppearanceCalculator.Solid.defaultNodeCustomGraphicsPosition4=C,C,c,0.00,0.00
nodeAppearanceCalculator.Solid.defaultNodeCustomGraphicsPosition5=C,C,c,0.00,0.00
nodeAppearanceCalculator.Solid.defaultNodeCustomGraphicsPosition6=C,C,c,0.00,0.00
nodeAppearanceCalculator.Solid.defaultNodeCustomGraphicsPosition7=C,C,c,0.00,0.00
nodeAppearanceCalculator.Solid.defaultNodeCustomGraphicsPosition8=C,C,c,0.00,0.00
nodeAppearanceCalculator.Solid.defaultNodeCustomGraphicsPosition9=C,C,c,0.00,0.00
nodeAppearanceCalculator.Solid.defaultNodeFillColor=102,102,102
nodeAppearanceCalculator.Solid.defaultNodeFont=Courier 10 Pitch Bold,plain,12
nodeAppearanceCalculator.Solid.defaultNodeFontSize=18.0
nodeAppearanceCalculator.Solid.defaultNodeHight=30.0
nodeAppearanceCalculator.Solid.defaultNodeLabel=
nodeAppearanceCalculator.Solid.defaultNodeLabelColor=0,0,0
nodeAppearanceCalculator.Solid.defaultNodeLabelOpacity=160.0
nodeAppearanceCalculator.Solid.defaultNodeLabelPosition=S,NW,c,0.00,5.00
nodeAppearanceCalculator.Solid.defaultNodeLabelWidth=100.0
nodeAppearanceCalculator.Solid.defaultNodeLineStyle=SOLID
nodeAppearanceCalculator.Solid.defaultNodeLineWidth=0.0
nodeAppearanceCalculator.Solid.defaultNodeOpacity=255.0
nodeAppearanceCalculator.Solid.defaultNodeShape=ellipse
nodeAppearanceCalculator.Solid.defaultNodeShowNestedNetwork=true
nodeAppearanceCalculator.Solid.defaultNodeSize=40.0
nodeAppearanceCalculator.Solid.defaultNodeToolTip=
nodeAppearanceCalculator.Solid.defaultNodeWidth=70.0
nodeAppearanceCalculator.Solid.nodeLabelCalculator=Solid-Node Label-Passthrough Mapper
nodeAppearanceCalculator.Solid.nodeSizeLocked=true
nodeAppearanceCalculator.Universe.defaultNodeBorderColor=0,0,0
nodeAppearanceCalculator.Universe.defaultNodeBorderOpacity=255.0
nodeAppearanceCalculator.Universe.defaultNodeCustomGraphics1=cytoscape.visual.customgraphic.NullCustomGraphics
nodeAppearanceCalculator.Universe.defaultNodeCustomGraphics2=cytoscape.visual.customgraphic.NullCustomGraphics
nodeAppearanceCalculator.Universe.defaultNodeCustomGraphics3=cytoscape.visual.customgraphic.NullCustomGraphics
nodeAppearanceCalculator.Universe.defaultNodeCustomGraphics4=cytoscape.visual.customgraphic.NullCustomGraphics
nodeAppearanceCalculator.Universe.defaultNodeCustomGraphics5=cytoscape.visual.customgraphic.NullCustomGraphics
nodeAppearanceCalculator.Universe.defaultNodeCustomGraphics6=cytoscape.visual.customgraphic.NullCustomGraphics
nodeAppearanceCalculator.Universe.defaultNodeCustomGraphics7=cytoscape.visual.customgraphic.NullCustomGraphics
nodeAppearanceCalculator.Universe.defaultNodeCustomGraphics8=cytoscape.visual.customgraphic.NullCustomGraphics
nodeAppearanceCalculator.Universe.defaultNodeCustomGraphics9=cytoscape.visual.customgraphic.NullCustomGraphics
nodeAppearanceCalculator.Universe.defaultNodeCustomGraphicsPosition1=C,C,c,0.00,0.00
nodeAppearanceCalculator.Universe.defaultNodeCustomGraphicsPosition2=C,C,c,0.00,0.00
nodeAppearanceCalculator.Universe.defaultNodeCustomGraphicsPosition3=C,C,c,0.00,0.00
nodeAppearanceCalculator.Universe.defaultNodeCustomGraphicsPosition4=C,C,c,0.00,0.00
nodeAppearanceCalculator.Universe.defaultNodeCustomGraphicsPosition5=C,C,c,0.00,0.00
nodeAppearanceCalculator.Universe.defaultNodeCustomGraphicsPosition6=C,C,c,0.00,0.00
nodeAppearanceCalculator.Universe.defaultNodeCustomGraphicsPosition7=C,C,c,0.00,0.00
nodeAppearanceCalculator.Universe.defaultNodeCustomGraphicsPosition8=C,C,c,0.00,0.00
nodeAppearanceCalculator.Universe.defaultNodeCustomGraphicsPosition9=C,C,c,0.00,0.00
nodeAppearanceCalculator.Universe.defaultNodeFillColor=0,0,0
nodeAppearanceCalculator.Universe.defaultNodeFont=Monospaced.bold,plain,12
nodeAppearanceCalculator.Universe.defaultNodeFontSize=20.0
nodeAppearanceCalculator.Universe.defaultNodeHight=30.0
nodeAppearanceCalculator.Universe.defaultNodeLabel=
nodeAppearanceCalculator.Universe.defaultNodeLabelColor=255,255,204
nodeAppearanceCalculator.Universe.defaultNodeLabelOpacity=180.0
nodeAppearanceCalculator.Universe.defaultNodeLabelPosition=C,C,c,0.00,0.00
nodeAppearanceCalculator.Universe.defaultNodeLabelWidth=100.0
nodeAppearanceCalculator.Universe.defaultNodeLineStyle=SOLID
nodeAppearanceCalculator.Universe.defaultNodeLineWidth=0.0
nodeAppearanceCalculator.Universe.defaultNodeOpacity=0.0
nodeAppearanceCalculator.Universe.defaultNodeShape=ellipse
nodeAppearanceCalculator.Universe.defaultNodeShowNestedNetwork=true
nodeAppearanceCalculator.Universe.defaultNodeSize=40.0
nodeAppearanceCalculator.Universe.defaultNodeToolTip=
nodeAppearanceCalculator.Universe.defaultNodeWidth=100.0
nodeAppearanceCalculator.Universe.nodeLabelCalculator=Universe-Node Label-Passthrough Mapper
nodeAppearanceCalculator.Universe.nodeSizeLocked=true
nodeAppearanceCalculator.default.defaultNodeBorderColor=102,102,102
nodeAppearanceCalculator.default.defaultNodeBorderOpacity=255.0
nodeAppearanceCalculator.default.defaultNodeCustomGraphics1=cytoscape.visual.customgraphic.NullCustomGraphics
nodeAppearanceCalculator.default.defaultNodeCustomGraphics2=cytoscape.visual.customgraphic.NullCustomGraphics
nodeAppearanceCalculator.default.defaultNodeCustomGraphics3=cytoscape.visual.customgraphic.NullCustomGraphics
nodeAppearanceCalculator.default.defaultNodeCustomGraphics4=cytoscape.visual.customgraphic.NullCustomGraphics
nodeAppearanceCalculator.default.defaultNodeCustomGraphics5=cytoscape.visual.customgraphic.NullCustomGraphics
nodeAppearanceCalculator.default.defaultNodeCustomGraphics6=cytoscape.visual.customgraphic.NullCustomGraphics
nodeAppearanceCalculator.default.defaultNodeCustomGraphics7=cytoscape.visual.customgraphic.NullCustomGraphics
nodeAppearanceCalculator.default.defaultNodeCustomGraphics8=cytoscape.visual.customgraphic.NullCustomGraphics
nodeAppearanceCalculator.default.defaultNodeCustomGraphics9=cytoscape.visual.customgraphic.NullCustomGraphics
nodeAppearanceCalculator.default.defaultNodeCustomGraphicsPosition1=C,C,c,0.00,0.00
nodeAppearanceCalculator.default.defaultNodeCustomGraphicsPosition2=C,C,c,0.00,0.00
nodeAppearanceCalculator.default.defaultNodeCustomGraphicsPosition3=C,C,c,0.00,0.00
nodeAppearanceCalculator.default.defaultNodeCustomGraphicsPosition4=C,C,c,0.00,0.00
nodeAppearanceCalculator.default.defaultNodeCustomGraphicsPosition5=C,C,c,0.00,0.00
nodeAppearanceCalculator.default.defaultNodeCustomGraphicsPosition6=C,C,c,0.00,0.00
nodeAppearanceCalculator.default.defaultNodeCustomGraphicsPosition7=C,C,c,0.00,0.00
nodeAppearanceCalculator.default.defaultNodeCustomGraphicsPosition8=C,C,c,0.00,0.00
nodeAppearanceCalculator.default.defaultNodeCustomGraphicsPosition9=C,C,c,0.00,0.00
nodeAppearanceCalculator.default.defaultNodeFillColor=255,153,153
nodeAppearanceCalculator.default.defaultNodeFont=Luxi Sans Bold,plain,12
nodeAppearanceCalculator.default.defaultNodeFontSize=15.0
nodeAppearanceCalculator.default.defaultNodeHight=30.0
nodeAppearanceCalculator.default.defaultNodeLabel=
nodeAppearanceCalculator.default.defaultNodeLabelColor=0,0,0
nodeAppearanceCalculator.default.defaultNodeLabelOpacity=255.0
nodeAppearanceCalculator.default.defaultNodeLabelPosition=C,C,c,0.00,0.00
nodeAppearanceCalculator.default.defaultNodeLabelWidth=100.0
nodeAppearanceCalculator.default.defaultNodeLineStyle=SOLID
nodeAppearanceCalculator.default.defaultNodeLineWidth=1.5
nodeAppearanceCalculator.default.defaultNodeOpacity=255.0
nodeAppearanceCalculator.default.defaultNodeShape=ellipse
nodeAppearanceCalculator.default.defaultNodeShowNestedNetwork=true
nodeAppearanceCalculator.default.defaultNodeSize=40.0
nodeAppearanceCalculator.default.defaultNodeToolTip=
nodeAppearanceCalculator.default.defaultNodeWidth=70.0
nodeAppearanceCalculator.default.nodeFillColorCalculator=default-Node Color-Discrete Mapper
nodeAppearanceCalculator.default.nodeLabelCalculator=NodeLabel
nodeAppearanceCalculator.default.nodeShapeCalculator=default-Node Shape-Discrete Mapper
nodeAppearanceCalculator.default.nodeSizeLocked=true
nodeBorderColorCalculator.Nested\ Network\ Style-Node\ Border\ Color-Discrete\ Mapper.mapping.controller=has_nested_network
nodeBorderColorCalculator.Nested\ Network\ Style-Node\ Border\ Color-Discrete\ Mapper.mapping.controllerType=-1
nodeBorderColorCalculator.Nested\ Network\ Style-Node\ Border\ Color-Discrete\ Mapper.mapping.map.yes=0,102,204
nodeBorderColorCalculator.Nested\ Network\ Style-Node\ Border\ Color-Discrete\ Mapper.mapping.type=DiscreteMapping
nodeBorderColorCalculator.Nested\ Network\ Style-Node\ Border\ Color-Discrete\ Mapper.visualPropertyType=NODE_BORDER_COLOR
nodeFillColorCalculator.Nested\ Network\ Style-Node\ Color-Discrete\ Mapper.mapping.controller=has_nested_network
nodeFillColorCalculator.Nested\ Network\ Style-Node\ Color-Discrete\ Mapper.mapping.controllerType=-1
nodeFillColorCalculator.Nested\ Network\ Style-Node\ Color-Discrete\ Mapper.mapping.map.yes=255,255,255
nodeFillColorCalculator.Nested\ Network\ Style-Node\ Color-Discrete\ Mapper.mapping.type=DiscreteMapping
nodeFillColorCalculator.Nested\ Network\ Style-Node\ Color-Discrete\ Mapper.visualPropertyType=NODE_FILL_COLOR
nodeFillColorCalculator.default-Node\ Color-Discrete\ Mapper.mapping.controller=Total
nodeFillColorCalculator.default-Node\ Color-Discrete\ Mapper.mapping.controllerType=4
nodeFillColorCalculator.default-Node\ Color-Discrete\ Mapper.mapping.map.Down=51,204,0
nodeFillColorCalculator.default-Node\ Color-Discrete\ Mapper.mapping.map.Up=255,51,51
nodeFillColorCalculator.default-Node\ Color-Discrete\ Mapper.mapping.type=DiscreteMapping
nodeFillColorCalculator.default-Node\ Color-Discrete\ Mapper.visualPropertyType=NODE_FILL_COLOR
nodeLabelCalculator.BasicPassThrough.mapping.controller=label
nodeLabelCalculator.BasicPassThrough.mapping.type=PassThroughMapping
nodeLabelCalculator.BasicPassThrough.visualPropertyType=NODE_LABEL
nodeLabelCalculator.Nested\ Network\ Style-Node\ Label-Passthrough\ Mapper.mapping.controller=ID
nodeLabelCalculator.Nested\ Network\ Style-Node\ Label-Passthrough\ Mapper.mapping.type=PassThroughMapping
nodeLabelCalculator.Nested\ Network\ Style-Node\ Label-Passthrough\ Mapper.visualPropertyType=NODE_LABEL
nodeLabelCalculator.NodeLabel.mapping.controller=ID
nodeLabelCalculator.NodeLabel.mapping.type=PassThroughMapping
nodeLabelCalculator.NodeLabel.visualPropertyType=NODE_LABEL
nodeLabelCalculator.Solid-Node\ Label-Passthrough\ Mapper.mapping.controller=ID
nodeLabelCalculator.Solid-Node\ Label-Passthrough\ Mapper.mapping.type=PassThroughMapping
nodeLabelCalculator.Solid-Node\ Label-Passthrough\ Mapper.visualPropertyType=NODE_LABEL
nodeLabelCalculator.Universe-Node\ Label-Passthrough\ Mapper.mapping.controller=ID
nodeLabelCalculator.Universe-Node\ Label-Passthrough\ Mapper.mapping.type=PassThroughMapping
nodeLabelCalculator.Universe-Node\ Label-Passthrough\ Mapper.visualPropertyType=NODE_LABEL
nodeLabelCalculator.id\ as\ node\ labels.mapping.controller=ID
nodeLabelCalculator.id\ as\ node\ labels.mapping.type=PassThroughMapping
nodeLabelCalculator.id\ as\ node\ labels.visualPropertyType=NODE_LABEL
nodeLabelColor.Nested\ Network\ Style-Node\ Label\ Color-Discrete\ Mapper.mapping.controller=has_nested_network
nodeLabelColor.Nested\ Network\ Style-Node\ Label\ Color-Discrete\ Mapper.mapping.controllerType=-1
nodeLabelColor.Nested\ Network\ Style-Node\ Label\ Color-Discrete\ Mapper.mapping.map.yes=0,102,204
nodeLabelColor.Nested\ Network\ Style-Node\ Label\ Color-Discrete\ Mapper.mapping.type=DiscreteMapping
nodeLabelColor.Nested\ Network\ Style-Node\ Label\ Color-Discrete\ Mapper.visualPropertyType=NODE_LABEL_COLOR
nodeLabelPositionCalculator.Nested\ Network\ Style-Node\ Label\ Position-Discrete\ Mapper.mapping.controller=has_nested_network
nodeLabelPositionCalculator.Nested\ Network\ Style-Node\ Label\ Position-Discrete\ Mapper.mapping.controllerType=-1
nodeLabelPositionCalculator.Nested\ Network\ Style-Node\ Label\ Position-Discrete\ Mapper.mapping.map.yes=SE,NW,c,0.00,0.00
nodeLabelPositionCalculator.Nested\ Network\ Style-Node\ Label\ Position-Discrete\ Mapper.mapping.type=DiscreteMapping
nodeLabelPositionCalculator.Nested\ Network\ Style-Node\ Label\ Position-Discrete\ Mapper.visualPropertyType=NODE_LABEL_POSITION
nodeLineWidthCalculator.Nested\ Network\ Style-Node\ Line\ Width-Discrete\ Mapper.mapping.controller=has_nested_network
nodeLineWidthCalculator.Nested\ Network\ Style-Node\ Line\ Width-Discrete\ Mapper.mapping.controllerType=-1
nodeLineWidthCalculator.Nested\ Network\ Style-Node\ Line\ Width-Discrete\ Mapper.mapping.map.yes=5.0
nodeLineWidthCalculator.Nested\ Network\ Style-Node\ Line\ Width-Discrete\ Mapper.mapping.type=DiscreteMapping
nodeLineWidthCalculator.Nested\ Network\ Style-Node\ Line\ Width-Discrete\ Mapper.visualPropertyType=NODE_LINE_WIDTH
nodeShapeCalculator.Nested\ Network\ Style-Node\ Shape-Discrete\ Mapper.mapping.controller=has_nested_network
nodeShapeCalculator.Nested\ Network\ Style-Node\ Shape-Discrete\ Mapper.mapping.controllerType=-1
nodeShapeCalculator.Nested\ Network\ Style-Node\ Shape-Discrete\ Mapper.mapping.map.yes=rect
nodeShapeCalculator.Nested\ Network\ Style-Node\ Shape-Discrete\ Mapper.mapping.type=DiscreteMapping
nodeShapeCalculator.Nested\ Network\ Style-Node\ Shape-Discrete\ Mapper.visualPropertyType=NODE_SHAPE
nodeShapeCalculator.default-Node\ Shape-Discrete\ Mapper.mapping.controller=Type
nodeShapeCalculator.default-Node\ Shape-Discrete\ Mapper.mapping.controllerType=4
nodeShapeCalculator.default-Node\ Shape-Discrete\ Mapper.mapping.map.miRNA=rect
nodeShapeCalculator.default-Node\ Shape-Discrete\ Mapper.mapping.type=DiscreteMapping
nodeShapeCalculator.default-Node\ Shape-Discrete\ Mapper.visualPropertyType=NODE_SHAPE
nodeUniformSizeCalculator.Nested\ Network\ Style-Node\ Size-Discrete\ Mapper.mapping.controller=has_nested_network
nodeUniformSizeCalculator.Nested\ Network\ Style-Node\ Size-Discrete\ Mapper.mapping.controllerType=-1
nodeUniformSizeCalculator.Nested\ Network\ Style-Node\ Size-Discrete\ Mapper.mapping.map.yes=60.0
nodeUniformSizeCalculator.Nested\ Network\ Style-Node\ Size-Discrete\ Mapper.mapping.type=DiscreteMapping
nodeUniformSizeCalculator.Nested\ Network\ Style-Node\ Size-Discrete\ Mapper.visualPropertyType=NODE_SIZE
nodeUniformSizeCalculator.Node\ Size-Continuous\ Mapper.mapping.boundaryvalues=2
nodeUniformSizeCalculator.Node\ Size-Continuous\ Mapper.mapping.bv0.domainvalue=0.0
nodeUniformSizeCalculator.Node\ Size-Continuous\ Mapper.mapping.bv0.equal=10.0
nodeUniformSizeCalculator.Node\ Size-Continuous\ Mapper.mapping.bv0.greater=10.0
nodeUniformSizeCalculator.Node\ Size-Continuous\ Mapper.mapping.bv0.lesser=
nodeUniformSizeCalculator.Node\ Size-Continuous\ Mapper.mapping.bv1.domainvalue=0.0
nodeUniformSizeCalculator.Node\ Size-Continuous\ Mapper.mapping.bv1.equal=30.0
nodeUniformSizeCalculator.Node\ Size-Continuous\ Mapper.mapping.bv1.greater=
nodeUniformSizeCalculator.Node\ Size-Continuous\ Mapper.mapping.bv1.lesser=30.0
nodeUniformSizeCalculator.Node\ Size-Continuous\ Mapper.mapping.controller=Degree
nodeUniformSizeCalculator.Node\ Size-Continuous\ Mapper.mapping.interpolator=LinearNumberToNumberInterpolator
nodeUniformSizeCalculator.Node\ Size-Continuous\ Mapper.mapping.type=ContinuousMapping
nodeUniformSizeCalculator.Node\ Size-Continuous\ Mapper.visualPropertyType=NODE_SIZE
