# Supplementary material for: MicroRNA Expression Changes during Interferon-Beta Treatment in the Peripheral Blood of Multiple Sclerosis Patients
Source: Int J Mol Sci. 2013 Aug 5;14(8):16087–110. doi: 10.3390/ijms140816087 (PMC3759901; doi:10.3390/ijms140816087)
Supplement: Supplementary File 2 — Supplementary2 (XLS, 56 KB) [file ijms-14-16087-s002.xls]

## Sheet: SuppFile2
Official Symbol	GeneCards ID	Entrez Gene ID	Official Full Name	Heatmap	MAID t0t1	MAID t0t2	MAID t0t3	Mean t0	Mean t1	Mean t2	Mean t3	Down t1	Up t1	Down t2	Up t2	Down t3	Up t3	P-value t0t1	P-value t0t2	P-value t0t3	GSE24427	GSE33464	Official Symbol
AHR	GC07P017304	196	aryl hydrocarbon receptor	70	Down			2306	1620	2918	2363	4	1	1	3	1	0	0.299314	0.283132	0.877602	FALSE	FALSE	AHR
ANKRD22	GC10M090572	118932	ankyrin repeat domain 22	26			Up	201	284	313	1011	0	1	0	1	0	4	0.161871	0.0299493	0.232275	TRUE	FALSE	ANKRD22
APOBEC3A	GC22P039348	200315	apolipoprotein B mRNA editing enzyme, catalytic polypeptide-like 3A	30			Up	1236	1749	1256	3285	0	3	1	2	0	5	0.0105128	0.93934	0.00816039	TRUE	TRUE	APOBEC3A
APOBEC3B	GC22P039378	9582	apolipoprotein B mRNA editing enzyme, catalytic polypeptide-like 3B	65			Up	253	332	272	779	0	1	0	0	0	4	0.25511	0.709278	0.125308	FALSE	TRUE	APOBEC3B
C10orf82	GC10M118413	143379	chromosome 10 open reading frame 82	77	Down			268	124	262	208	4	0	2	1	0	0	0.0389428	0.93775	0.233477	FALSE	FALSE	C10orf82
C3AR1	GC12M008210	719	complement component 3a receptor 1	55	Up			2058	2983	2280	3272	0	4	0	1	0	3	0.0886051	0.171401	0.0725561	TRUE	TRUE	C3AR1
CCL2	GC17P032582	6347	chemokine (C-C motif) ligand 2	58			Up	89	135	23	422	0	1	0	0	0	4	0.337535	0.0436402	0.0510751	TRUE	TRUE	CCL2
CD163	GC12M007523	9332	CD163 molecule	93	Up	Up		1852	3748	3987	1898	0	4	0	4	0	1	0.0216425	0.0881117	0.82782	TRUE	TRUE	CD163
CD38	GC04P015779	952	CD38 molecule	20	Up		Up	464	775	621	878	0	4	0	0	0	4	0.0520503	0.0700842	0.0104035	TRUE	FALSE	CD38
CD83	GC06P014117	9308	CD83 molecule	94		Down		829	719	430	699	1	0	4	0	1	0	0.323365	0.022222	0.441298	FALSE	FALSE	CD83
CDKN1C	GC11M002861	1028	cyclin-dependent kinase inhibitor 1C (p57, Kip2)	71		Down		901	779	484	924	1	0	4	0	0	0	0.246521	0.0144781	0.848391	FALSE	FALSE	CDKN1C
CHMP5	GC09P033257	51510	chromatin modifying protein 5	44			Up	1827	2127	1970	2944	0	1	0	0	0	4	0.0880857	0.211805	0.00408009	TRUE	FALSE	CHMP5
CLC	GC19M040221	1178	Charcot-Leyden crystal protein	80			Down	2415	2062	2407	1081	1	0	2	1	4	0	0.0850356	0.988178	0.0421903	TRUE	FALSE	CLC
CLEC4E	GC12M008685	26253	C-type lectin domain family 4, member E	62		Up		1012	1268	1551	1207	0	1	0	4	0	2	0.0908905	0.0224239	0.248424	TRUE	FALSE	CLEC4E
CMPK2	GC02M006980	129607	cytidine monophosphate (UMP-CMP) kinase 2, mitochondrial	2			Up	944	1603	1361	5020	0	3	0	2	0	6	0.056489	0.0282632	0.00144157	TRUE	TRUE	CMPK2
CTSL1	GC09P090341	1514	cathepsin L1	43			Up	611	839	639	1189	0	1	0	0	0	4	0.0224914	0.595427	0.00171384	FALSE	FALSE	CTSL1
CXCL10	GC04M076942	3627	chemokine (C-X-C motif) ligand 10	27			Up	226	281	206	1874	0	0	1	0	0	4	0.123533	0.742431	0.265482	TRUE	TRUE	CXCL10
CXCR4	GC02M136894	7852	chemokine (C-X-C motif) receptor 4	73		Up		5977	5177	10738	6310	1	0	0	4	0	1	0.316997	0.034584	0.66009	FALSE	FALSE	CXCR4
DDIT4	GC10P074033	54541	DNA-damage-inducible transcript 4	63		Up		1228	1487	5571	1893	1	3	1	5	0	3	0.540488	0.0230572	0.148697	FALSE	FALSE	DDIT4
DDX60	GC04M169137	55601	DEAD (Asp-Glu-Ala-Asp) box polypeptide 60	12			Up	1351	1603	1611	2920	0	1	0	1	0	4	0.129147	0.288352	0.00804843	TRUE	TRUE	DDX60
DDX60L	GC04M169277	91351	DEAD (Asp-Glu-Ala-Asp) box polypeptide 60-like	29			Up	688	851	775	1190	0	1	0	1	0	4	0.0218434	0.282974	0.0173885	TRUE	FALSE	DDX60L
DUSP6	GC12M089741	1848	dual specificity phosphatase 6	85		Down		11126	11112	7129	10197	0	0	4	0	1	0	0.992158	0.0186916	0.606416	TRUE	FALSE	DUSP6
EGR1	GC05P137801	1958	early growth response 1	86		Down		1846	2213	1132	1903	1	2	4	0	1	1	0.386958	0.0393344	0.876772	FALSE	TRUE	EGR1
EGR2	GC10M064571	1959	early growth response 2	89		Down		1037	1337	352	959	1	1	5	0	1	0	0.323938	0.00761831	0.66594	FALSE	TRUE	EGR2
EPSTI1	GC13M043460	94240	epithelial stromal interaction 1 (breast)	4			Up	982	1473	1236	3656	0	2	0	1	0	6	0.0646037	0.0536575	0.00365691	TRUE	TRUE	EPSTI1
FCER1A	GC01P159259	2205	Fc fragment of IgE, high affinity I, receptor for; alpha polypeptide	81	Down	Down	Down	3205	1869	2070	1695	5	0	4	0	6	0	0.0182294	0.0327077	0.000691091	TRUE	TRUE	FCER1A
FKBP5	GC06M035541	2289	FK506 binding protein 5	54		Up		940	1101	1759	1450	0	1	0	4	0	3	0.264045	0.0126801	0.00364967	TRUE	FALSE	FKBP5
GBP1	GC01M089517	2633	guanylate binding protein 1, interferon-inducible, 67kDa	25			Up	2121	2020	1803	5855	1	0	1	0	0	4	0.586476	0.146481	0.189879	TRUE	TRUE	GBP1
GZMB	GC14M025100	3002	granzyme B (granzyme 2, cytotoxic T-lymphocyte-associated serine esterase 1)	61			Up	5628	6626	6669	9461	0	1	0	1	0	4	0.0178417	0.0935192	0.0178763	TRUE	TRUE	GZMB
HBA1	GC16P000241	3039	hemoglobin, alpha 1	68		Up		3365	4858	8715	3350	0	2	0	4	3	1	0.170494	0.0532985	0.990906	FALSE	FALSE	HBA1
HBA2	GC16P000244	3040	hemoglobin, alpha 2	67		Up		12559	18110	28403	13235	0	2	0	4	3	1	0.229982	0.0421749	0.874386	FALSE	FALSE	HBA2
HBB	GC11M005250	3043	hemoglobin, beta	66		Up		31577	40712	54460	29279	0	2	0	4	2	1	0.0924469	0.0376508	0.766932	TRUE	FALSE	HBB
HBD	GC11M005251	3045	hemoglobin, delta	69		Up		390	541	911	312	0	2	0	4	1	0	0.149517	0.0410219	0.696442	FALSE	FALSE	HBD
HERC5	GC04P089378	51191	hect domain and RLD 5	19			Up	815	1093	1076	2697	0	1	0	1	0	6	0.215655	0.0518109	0.00103517	TRUE	TRUE	HERC5
HERC6	GC04P089299	55008	hect domain and RLD 6	34			Up	662	772	820	1483	0	1	0	0	0	5	0.291062	0.0472069	0.00291137	TRUE	TRUE	HERC6
IFI27	GC14P094577	3429	interferon, alpha-inducible protein 27	17		Up	Up	32	306	330	3057	0	3	0	4	0	6	0.0695351	0.0243854	0.0122654	TRUE	TRUE	IFI27
IFI35	GC17P041158	3430	interferon-induced protein 35	15			Up	875	1064	858	1816	0	0	0	0	0	5	0.121703	0.794174	0.0082657	TRUE	TRUE	IFI35
IFI44	GC01P079115	10561	interferon-induced protein 44	7		Up	Up	1456	2882	2375	7189	0	3	0	4	0	6	0.0445524	0.00223394	0.000678686	TRUE	TRUE	IFI44
IFI44L	GC01P079085	10964	interferon-induced protein 44-like	6	Up	Up	Up	1089	3034	2536	10615	0	4	0	5	0	6	0.0272119	0.0060347	0.000655744	TRUE	TRUE	IFI44L
IFI6	GC01M027992	2537	interferon, alpha-inducible protein 6	8	Up	Up	Up	2246	5222	3597	11317	0	4	0	4	0	6	0.0287321	0.00934438	0.00174339	TRUE	TRUE	IFI6
IFIH1	GC02M163123	64135	interferon induced with helicase C domain 1	42			Up	524	599	587	1008	0	1	0	0	0	5	0.259699	0.247098	0.00213328	TRUE	FALSE	IFIH1
IFIT1	GC10P091142	3434	interferon-induced protein with tetratricopeptide repeats 1	32		Up	Up	634	1384	962	5836	1	3	0	4	0	6	0.147351	0.0665185	0.00111983	TRUE	TRUE	IFIT1
IFIT2	GC10P091051	3433	interferon-induced protein with tetratricopeptide repeats 2	16			Up	478	629	459	1551	0	1	0	0	0	6	0.0660679	0.406381	0.0156883	TRUE	TRUE	IFIT2
IFIT3	GC10P091077	3437	interferon-induced protein with tetratricopeptide repeats 3	1	Up		Up	907	1969	1278	6382	0	4	0	2	0	6	0.0402099	0.0528542	0.00325944	TRUE	TRUE	IFIT3
IFIT5	GC10P091164	24138	interferon-induced protein with tetratricopeptide repeats 5	45			Up	596	753	720	1180	0	1	0	1	0	6	0.037386	0.0830004	9.08264e-05	TRUE	TRUE	IFIT5
IFITM1	GC11P000303	8519	interferon induced transmembrane protein 1 (9-27)	51			Up	20527	21973	22931	33946	0	1	0	0	0	4	0.428622	0.0666854	0.00631691	TRUE	FALSE	IFITM1
IFITM2	GC11P000300	10581	interferon induced transmembrane protein 2 (1-8D)	46			Up	11637	14348	12670	21061	0	1	0	0	0	6	0.0399976	0.296819	0.00179104	FALSE	FALSE	IFITM2
IFITM3	GC11M000309	10410	interferon induced transmembrane protein 3 (1-8U)	14	Up		Up	2973	6867	4298	15277	0	4	0	3	0	6	0.0226046	0.0919538	0.00599269	FALSE	FALSE	IFITM3
IGJ	GC04M071478	3512	immunoglobulin J polypeptide, linker protein for immunoglobulin alpha and mu polypeptides	64	Up	Up		8432	16728	14325	11225	0	4	0	4	0	2	0.172077	0.0175813	0.108238	FALSE	FALSE	IGJ
IL1B	GC02M113682	3553	interleukin 1, beta	92		Down		1064	789	457	912	2	0	5	0	2	0	0.0116168	0.00081598	0.362445	FALSE	FALSE	IL1B
IL1R2	GC02P102608	7850	interleukin 1 receptor, type II	88		Up		147	239	593	84	0	2	0	4	0	0	0.141181	0.0663012	0.126185	TRUE	FALSE	IL1R2
IL8	GC04P074595	3576	interleukin 8	91		Down		674	436	396	367	2	0	4	0	3	0	0.0627121	0.0166326	0.0378795	TRUE	TRUE	IL8
IRF7	GC11M000602	3665	interferon regulatory factor 7	40			Up	1181	1519	1246	2536	0	2	0	0	0	6	0.0276963	0.514681	0.00236572	TRUE	TRUE	IRF7
ISG15	GC01P000938	9636	ISG15 ubiquitin-like modifier	48			Up	3888	5934	5163	16763	0	2	0	3	0	6	0.0944522	0.0532592	0.00335687	TRUE	TRUE	ISG15
ITGAE	GC17M003564	3682	integrin, alpha E (antigen CD103, human mucosal lymphocyte antigen 1; alpha polypeptide)	78			Down	3072	2785	2808	1954	0	0	1	0	4	0	0.245218	0.367049	0.00483742	FALSE	FALSE	ITGAE
JUNB	GC19P012902	3726	jun B proto-oncogene	83		Down		3217	3290	2114	2765	0	0	4	0	1	0	0.780198	0.0251294	0.457633	FALSE	FALSE	JUNB
LAP3	GC04P017578	51056	leucine aminopeptidase 3	22			Up	2865	3258	2703	7477	0	2	0	0	0	6	0.323288	0.487435	0.0698309	FALSE	TRUE	LAP3
LGALS2	GC22M037966	3957	lectin, galactoside-binding, soluble, 2	90		Down		5459	4664	3387	5513	2	0	4	0	0	1	0.419401	0.0427114	0.947597	TRUE	FALSE	LGALS2
LGALS3BP	GC17M076970	3959	lectin, galactoside-binding, soluble, 3 binding protein	38			Up	263	335	269	619	0	1	0	0	0	5	0.176191	0.755787	0.0030135	TRUE	TRUE	LGALS3BP
LINGO3	GC19M002289	645191	leucine rich repeat and Ig domain containing 3	84		Down		417	286	210	266	2	0	4	0	3	0	0.0962246	0.0276141	0.151845	FALSE	FALSE	LINGO3
LOC391020	GC01M025196	391020		13			Up	569	690	658	1509	0	1	0	1	0	6	0.415823	0.447767	0.00251708	FALSE	TRUE	LOC391020
LTF	GC03M046452	4057	lactotransferrin	82		Up		1966	2394	5606	1670	0	2	0	4	3	2	0.380578	0.228813	0.573156	FALSE	FALSE	LTF
LY6E	GC08P144171	4061	lymphocyte antigen 6 complex, locus E	50			Up	234	314	257	673	0	1	0	1	0	6	0.356497	0.671508	0.00223787	TRUE	TRUE	LY6E
MARCKS	GC06P114224	4082	myristoylated alanine-rich protein kinase C substrate	53			Up	810	918	621	1360	0	0	1	0	0	4	0.309598	0.0563068	0.000296333	TRUE	FALSE	MARCKS
MS4A4A	GC11P060048	51338	membrane-spanning 4-domains, subfamily A, member 4	49			Up	454	715	479	987	0	2	0	0	0	5	0.0267591	0.606175	0.000503832	TRUE	TRUE	MS4A4A
MT2A	GC16P056642	4502	metallothionein 2A	41			Up	3892	5747	5845	9700	0	2	0	3	0	6	0.0812709	0.095042	0.0168807	FALSE	FALSE	MT2A
MX1	GC21P042792	4599	myxovirus (influenza virus) resistance 1, interferon-inducible protein p78 (mouse)	31		Up	Up	1436	2541	2300	7093	0	3	0	4	0	6	0.0543123	0.0244676	0.000702011	TRUE	TRUE	MX1
MX2	GC21P042734	4600	myxovirus (influenza virus) resistance 2 (mouse)	37			Up	1366	1759	1550	3024	0	1	0	0	0	5	0.016797	0.0349506	0.00430255	TRUE	TRUE	MX2
NELL2	GC12M044981	4753	NEL-like 2 (chicken)	95	Down			3107	2001	3243	2656	4	0	0	1	0	0	0.0138506	0.709483	0.228669	FALSE	FALSE	NELL2
NEXN	GC01P078354	91624	nexilin (F actin binding protein)	52	Up		Up	645	1168	808	1228	0	4	0	1	0	4	0.0136348	0.306303	0.00755745	TRUE	FALSE	NEXN
NRGN	GC11P124643	4900	neurogranin (protein kinase C substrate, RC3)	75			Down	6041	8414	8699	4341	1	2	0	2	4	0	0.239145	0.137222	0.0162621	TRUE	FALSE	NRGN
OAS1	GC12P113344	4938	2',5'-oligoadenylate synthetase 1, 40/46kDa	28			Up	1530	2169	1617	4070	0	3	0	0	0	6	0.0188814	0.329519	0.00996458	TRUE	TRUE	OAS1
OAS2	GC12P113416	4939	2'-5'-oligoadenylate synthetase 2, 69/71kDa	47			Up	553	616	502	965	0	0	0	0	0	4	0.203895	0.129212	0.0015862	TRUE	TRUE	OAS2
OAS3	GC12P113376	4940	2'-5'-oligoadenylate synthetase 3, 100kDa	57			Up	495	691	568	1432	0	2	0	0	0	6	0.174709	0.30599	0.00240361	TRUE	TRUE	OAS3
OASL	GC12M121459	8638	2'-5'-oligoadenylate synthetase-like	33			Up	374	537	425	1066	0	1	0	0	0	6	0.0145457	0.247816	0.00140134	TRUE	TRUE	OASL
PARP9	GC03M122246	83666	poly (ADP-ribose) polymerase family, member 9	9			Up	884	1118	997	2262	0	1	0	0	0	6	0.108528	0.0369082	0.0125519	TRUE	TRUE	PARP9
PAX5	GC09M036828	5079	paired box 5	79			Down	271	165	230	68	2	0	0	0	5	0	0.0821162	0.295715	0.00579463	FALSE	FALSE	PAX5
PLAC8	GC04M083935	51316	placenta-specific 8	18			Up	15373	17413	16579	25206	0	1	0	0	0	4	0.108929	0.157823	0.00704833	TRUE	FALSE	PLAC8
PLSCR1	GC03M146232	5359	phospholipid scramblase 1	39			Up	3019	3586	3400	7482	0	1	0	1	0	6	0.189377	0.101472	0.000359776	TRUE	TRUE	PLSCR1
POM121L9P	GC22P024649	29774	POM121 membrane glycoprotein-like 9 (rat) pseudogene	59			Up	152	366	420	488	0	3	0	3	0	4	0.00803953	0.118203	0.0179835	FALSE	FALSE	POM121L9P
RPL7	GC08M074252	6129	ribosomal protein L7	60			Up	464	591	407	804	0	2	2	2	1	4	0.298745	0.78822	0.176198	FALSE	FALSE	RPL7
RSAD2	GC02P007005	91543	radical S-adenosyl methionine domain containing 2	11		Up	Up	328	609	626	2167	0	3	0	4	0	6	0.0513036	0.00784093	0.00235179	TRUE	TRUE	RSAD2
RTP4	GC03P187086	64108	receptor (chemosensory) transporter protein 4	56			Up	358	443	317	854	1	1	1	0	0	5	0.383749	0.526577	0.0335881	TRUE	TRUE	RTP4
SAMD9L	GC07M092759	219285	sterile alpha motif domain containing 9-like	3			Up	1159	1422	1241	2390	0	1	0	0	0	5	0.0821445	0.232101	0.00323726	TRUE	TRUE	SAMD9L
SCO2	GC22M050961	9997	SCO cytochrome oxidase deficient homolog 2 (yeast)	24			Up	2338	2796	1795	5057	0	1	2	0	0	4	0.247048	0.0457037	0.0546521	TRUE	TRUE	SCO2
SESN1	GC06M109353	27244	sestrin 1	72		Up		1062	1283	2445	1166	0	1	0	5	0	0	0.1727	0.0110811	0.190593	FALSE	FALSE	SESN1
SH3BGRL2	GC06P080397	83699	SH3 domain binding glutamic acid-rich protein like 2	76			Down	1256	1821	1939	864	0	1	0	3	4	0	0.320102	0.208026	0.0188805	TRUE	TRUE	SH3BGRL2
SIGLEC1	GC20M003616	6614	sialic acid binding Ig-like lectin 1, sialoadhesin	5	Up	Up	Up	178	698	410	1480	0	5	0	4	0	6	0.0119519	0.000526761	0.000903757	TRUE	TRUE	SIGLEC1
STAT1	GC02M191829	6772	signal transducer and activator of transcription 1, 91kDa	23			Up	2742	2883	2331	6749	1	1	1	0	0	5	0.741937	0.125635	0.0632527	TRUE	TRUE	STAT1
TNFSF10	GC03M172223	8743	tumor necrosis factor (ligand) superfamily, member 10	21			Up	4878	5574	4415	9775	0	1	0	0	0	4	0.1799	0.0742899	0.0735016	TRUE	FALSE	TNFSF10
TRIM22	GC11P005667	10346	tripartite motif-containing 22	10			Up	7343	8137	9130	12674	0	0	0	0	0	4	0.0613686	0.0147393	0.00637377	TRUE	FALSE	TRIM22
TSC22D3	GC0XM106956	1831	TSC22 domain family, member 3	87		Up		5217	5318	10020	4843	1	1	0	4	1	0	0.925629	0.0412886	0.606484	FALSE	FALSE	TSC22D3
TUBA1A	GC12M049578	7846	tubulin, alpha 1a	74		Down		12961	12012	8382	11132	0	0	4	0	1	0	0.204145	0.0036267	0.0789981	FALSE	FALSE	TUBA1A
USP18	GC22P018632	11274	ubiquitin specific peptidase 18	36			Up	368	381	433	901	0	0	0	1	0	5	0.838388	0.363619	0.00149101	FALSE	FALSE	USP18
XAF1	GC17P006659	54739	XIAP associated factor 1	35			Up	2104	3135	2921	6068	0	3	0	3	0	6	0.0569032	0.0169501	0.00236967	TRUE	TRUE	XAF1
Legends	This is the gene identifier according to the GeneCards database, version 3.03			In the heat map (figure 2) the data of each gene are visualized in a row that is given here								The number of patients that showed a strong up- or down-regulation (|MAID|>2.0) at this time point compared to baseline
													The gene was filtered because at least 4 patients showed a strong change in expression
					The filtering result is summarized here according to the following scheme
					Up	The gene was filtered as up-regulated at this time point in comparison to baseline												The p-values of the paired t-tests comparing the expression during therapy versus baseline
						The average expression of this gene was just higher at this time point compared to the mean pre-treatment level													The gene was differentially expressed with p-value<0.05
						The average expression of this gene was just lower at this time point compared to the mean pre-treatment level
					Down	The gene was filtered as down-regulated at this time point in comparison to baseline															If true, the gene was described to be differentially expressed in response to IFN-beta-1b sc. therapy in (Goertsches et al., 2010, GEO database: GSE24427)
					t0 = baseline
					t1 = day 2			The average expression over all patients per time point and gene														If true, the gene was described to be differentially expressed in response to IFN-beta-1a sc. therapy in (Hecker et al., 2013, GEO database: GSE33464)
					t2 = day 4
					t3 = month 1
