# Supplementary material for: MicroRNA Expression Changes during Interferon-Beta Treatment in the Peripheral Blood of Multiple Sclerosis Patients
Source: Int J Mol Sci. 2013 Aug 5;14(8):16087–110. doi: 10.3390/ijms140816087 (PMC3759901; doi:10.3390/ijms140816087)
Supplement: Supplementary File 3 — Supplementary3 (XLS, 35 KB) [file ijms-14-16087-s003.xls]

## Sheet: SuppFile3
Mature miRNA	TaqMan Detector	Card	MAID t0t1	MAID t0t2	MAID t0t3	Mean Ct t0	Mean Ct t1	Mean Ct t2	Mean Ct t3	Mean linear t0	Mean linear t1	Mean linear t2	Mean linear t3	Down t1	Up t1	Down t2	Up t2	Down t3	Up t3	P-value t0t1	P-value t0t2	P-value t0t3	Val Affy Mean t0	Val Affy Mean t3	Val Affy Diff	Val PCR Mean t0	Val PCR Mean t3	Val PCR Diff	Mature miRNA
hsa-let-7a-5p	hsa-let-7a-4373169	A			Up	22.9806	22.7467	23.0365	22.8816	120.827	139.441	111.731	160.677	0	1	1	1	0	4	0.295139	0.605676	0.0737986	13.2565	13.264	Unchanged				hsa-let-7a-5p
hsa-let-7b-5p	hsa-let-7b-4395446	A			Up	21.3981	21.0599	21.1132	21.0653	409.155	493.173	451.765	654.088	0	2	1	2	0	4	0.0631405	0.414474	0.142123	13.5226	13.4039	Down				hsa-let-7b-5p
hsa-miR-16-5p	hsa-miR-16-4373121	A			Up	17.5763	17.3786	17.4141	17.4636	4865.06	5745.02	5189.14	6476.41	0	2	0	1	0	4	0.190536	0.522431	0.0140758	14.7623	14.8512	Up	6558.2	6667.96	Up	hsa-miR-16-5p
hsa-miR-27a-5p	hsa-miR-27a*-4395556	B		Down		25.4052	25.9884	26.4096	26.2996	29.5553	21.1921	15.5331	22.5928	1	0	4	0	1	0	0.030964	0.0330457	0.190966	6.36603	5.45124	Down				hsa-miR-27a-5p
hsa-miR-29a-3p	hsa-miR-29a-4395223	A			Down	21.2745	21.8808	21.3587	22.0603	381.501	252.631	371.852	265.674	3	0	1	1	4	0	0.0725009	0.862255	0.0547793	12.7747	12.6119	Down	967.145	578.143	Down	hsa-miR-29a-3p
hsa-miR-29b-1-5p	hsa-miR-29b-1*-4395276	B			Down	30.7108	31.2566	30.9704	33.6784	1.7075	0.793122	0.837203	0.498008	2	1	2	0	4	0	0.325796	0.246518	0.150861	4.63943	4.39477	Down				hsa-miR-29b-1-5p
hsa-miR-29c-3p	hsa-miR-29c-4395171	A			Down	21.8164	22.3418	21.927	22.5745	259.653	190.758	240.274	186.995	3	0	1	1	4	0	0.00650052	0.585281	0.0165302	8.13902	7.5994	Down	427.683	259.186	Down	hsa-miR-29c-3p
hsa-miR-95	hsa-miR-95-4373011	A			Down	27.0456	27.5001	27.0938	27.9087	6.81214	5.28786	7.02212	4.59649	2	0	1	1	4	0	0.0523701	0.9	0.00980603	4.17447	4.11921	Down				hsa-miR-95
hsa-miR-149-5p	hsa-miR-149-4395366	A		Down	Down	29.3149	33.9607	32.8564	36.9472	1.93593	0.547612	0.547375	0.0433067	3	0	5	0	5	0	0.0505024	0.00385995	0.0117928	4.65988	4.48072	Down	0.0964342	0.0817625	Down	hsa-miR-149-5p
hsa-miR-181c-3p	hsa-miR-181c*-4395444	B			Down	29.8265	29.919	31.2165	32.3031	3.38002	2.82724	3.49261	1.7861	2	1	1	1	4	0	0.676318	0.922925	0.115956	7.15525	7.1456	Unchanged				hsa-miR-181c-3p
hsa-miR-193a-3p	hsa-miR-193a-3p-4395361	A		Down		32.7677	34.585	36.1249	34.448	0.23644	0.207915	0.0868617	0.273307	2	1	4	1	2	0	0.816575	0.254374	0.770961	4.93795	4.60181	Down				hsa-miR-193a-3p
hsa-miR-193a-5p	hsa-miR-193a-5p-4395392	A		Down		27.4538	27.889	28.1328	27.7924	5.40562	3.99186	3.34383	5.1923	3	0	4	0	1	0	0.0905652	0.0236909	0.724554	6.93924	6.42276	Down				hsa-miR-193a-5p
hsa-miR-342-5p	hsa-miR-342-5p-4395258	A			Up	25.6037	26.0251	25.2916	25.0902	20.6412	14.9012	26.5728	34.5819	2	0	1	2	0	4	0.172603	0.256847	0.103976	10.2745	10.2955	Unchanged				hsa-miR-342-5p
hsa-miR-346	hsa-miR-346-4373038	A			Up	28.0923	27.63	27.5687	27.5151	4.61691	6.69081	9.24212	8.76226	1	3	1	3	0	4	0.313175	0.268803	0.0258567	5.31621	5.23283	Down				hsa-miR-346
hsa-miR-423-5p	hsa-miR-423-5p-4395451	A			Down	27.0171	28.6791	26.5424	29.7635	8.42368	8.56783	11.3343	5.02917	1	1	0	2	4	0	0.941638	0.221884	0.00912859	10.8693	10.6765	Down				hsa-miR-423-5p
hsa-miR-518b	hsa-miR-518b-4373246	A			Up	32.2671	31.8236	31.6361	30.1961	0.588798	0.90237	0.980597	1.42559	1	3	0	2	0	4	0.254385	0.475565	0.026877	4.16826	4.16282	Unchanged				hsa-miR-518b
hsa-miR-532-5p	hsa-miR-532-5p-4380928	A		Down		23.2719	23.833	23.6592	23.8753	93.6558	71.0328	69.7959	74.924	1	0	4	0	2	0	0.207518	0.000696544	0.0198162	9.69184	9.41721	Down	36.2522	30.4583	Down	hsa-miR-532-5p
hsa-miR-708-5p	hsa-miR-708-4395452	A		Down	Down	29.5777	30.2427	30.8376	30.8298	2.07303	1.18081	0.85908	0.796485	2	0	4	0	4	0	0.100377	0.0598985	0.0887485	4.72581	4.6271	Down				hsa-miR-708-5p
hsa-miR-760	hsa-miR-760-4395439	B	Up			28.7866	26.6573	26.8373	27.074	10.4339	22.9744	17.4316	15.1698	1	4	1	3	0	2	0.239274	0.348051	0.0412044	6.08062	5.58079	Down				hsa-miR-760
hsa-miR-874	hsa-miR-874-4395379	A	Down			26.8162	31.1504	28.3669	31.9011	10.9962	4.70969	10.5532	8.00602	4	0	1	2	3	0	0.0304273	0.861993	0.280596	7.8291	7.34053	Down				hsa-miR-874
Legends	The TaqMan microRNA assay		The filtering result is summarized here according to the following scheme											The number of patients that showed a strong up- or down-regulation (|MAID|>1.0) at this time point compared to baseline												The results of the validation experiment using TaqMan single-tube assays
			Up	The miRNA was filtered as up-regulated at this time point in comparison to baseline											The miRNA was filtered because at least 4 patients showed a strong change in expression											Given are the normalized expression values averaged over the independent cohort of patients (n=12)
				The average expression of this miRNA was just higher at this time point compared to the mean pre-treatment level																						The difference of the expression levels indicates up- or down-regulation
				The average expression of this miRNA was just lower at this time point compared to the mean pre-treatment level																The p-values of the paired t-tests comparing the expression during therapy versus baseline
			Down	The miRNA was filtered as down-regulated at this time point in comparison to baseline																	The miRNA was differentially expressed with p-value<0.05
			t0 = baseline
			t1 = day 2			The average expression over all 6 patients per time point and miRNA (TaqMan miRNA Cards, non-normalized data, i.e. raw Ct values)																	The results of the validation experiment using Affymetrix miRNA arrays
			t2 = day 4																				Given are the normalized expression values averaged over the patients (Pat1-3)
			t3 = month 1							The average expression over all 6 patients per time point and miRNA (TaqMan miRNA Cards, normalized data)													The difference of the expression levels after one month of IFN-beta therapy compared to baseline indicates up- or down-regulation
																							Unchanged	The label "unchanged" was given, if the difference in expression was <0.05
