# Supplementary material for: MicroRNA Expression Changes during Interferon-Beta Treatment in the Peripheral Blood of Multiple Sclerosis Patients
Source: Int J Mol Sci. 2013 Aug 5;14(8):16087–110. doi: 10.3390/ijms140816087 (PMC3759901; doi:10.3390/ijms140816087)
Supplement: Supplementary File 4 — Supplementary4 (XLS, 25 KB) [file ijms-14-16087-s004.xls]

## Sheet: SuppFile4
Patient	Type	Gender	Age1	Disease duration2	EDSS3	Previous treatment4
Pat7	RRMS	Male	51	5	3.5	-
Pat8	RRMS	Male	61	16	2	-
Pat9	CIS	Female	26	3	1.5	-
Pat10	CIS	Female	31	6	1.5	-
Pat11	RRMS	Female	41	29	1	-
Pat12	RRMS	Male	31	3	2	-
Pat13	RRMS	Female	22	2	1.5	-
Pat14	RRMS	Male	46	125	1	IFN-beta-1b sc.
Pat15	CIS	Male	26	16	1	-
Pat16	CIS	Female	26	7	1	-
Pat17	RRMS	Female	55	28	1.5	-
Pat18	RRMS	Female	18	65	1	-
1 in years; 2 in months; 3 at baseline (i.e. before the start of IFN-beta therapy);
4 Pat14 started a therapy with IFN-beta-1b in 2000, stopped the treatment due to side effects in 2001, and started again the therapy in 2010 after experiencing a relapse,
the other patients received no immunomodulatory or immunosuppressive therapy previously.
