# Supplementary material for: MicroRNA Expression Changes during Interferon-Beta Treatment in the Peripheral Blood of Multiple Sclerosis Patients
Source: Int J Mol Sci. 2013 Aug 5;14(8):16087–110. doi: 10.3390/ijms140816087 (PMC3759901; doi:10.3390/ijms140816087)
Supplement: Supplementary File 5 — Supplementary5 (XLS, 55 KB) [file ijms-14-16087-s005.xls]

## Sheet: SuppFile5
Patient	Time point	microRNA	Raw Ct
Pat7	baseline	hsa-miR-149-5p	34.814
Pat7	baseline	hsa-miR-149-5p	34.7742
Pat7	baseline	hsa-miR-149-5p	36.6086
Pat7	baseline	hsa-miR-16-5p	20.3969
Pat7	baseline	hsa-miR-16-5p	20.2191
Pat7	baseline	hsa-miR-16-5p	20.2665
Pat7	baseline	hsa-miR-191-5p	22.7982
Pat7	baseline	hsa-miR-191-5p	22.9684
Pat7	baseline	hsa-miR-191-5p	22.6534
Pat7	baseline	hsa-miR-29a-3p	22.4657
Pat7	baseline	hsa-miR-29a-3p	22.4682
Pat7	baseline	hsa-miR-29a-3p	22.5639
Pat7	baseline	hsa-miR-29c-3p	23.463
Pat7	baseline	hsa-miR-29c-3p	23.6175
Pat7	baseline	hsa-miR-29c-3p	23.4391
Pat7	baseline	hsa-miR-532-5p	27.5177
Pat7	baseline	hsa-miR-532-5p	27.3963
Pat7	baseline	hsa-miR-532-5p	27.5906
Pat7	1 month	hsa-miR-149-5p	35.4582
Pat7	1 month	hsa-miR-149-5p	35.2788
Pat7	1 month	hsa-miR-149-5p	35.3633
Pat7	1 month	hsa-miR-16-5p	19.8924
Pat7	1 month	hsa-miR-16-5p	20.0513
Pat7	1 month	hsa-miR-16-5p	19.8147
Pat7	1 month	hsa-miR-191-5p	22.5315
Pat7	1 month	hsa-miR-191-5p	22.6207
Pat7	1 month	hsa-miR-191-5p	22.6825
Pat7	1 month	hsa-miR-29a-3p	23.3911
Pat7	1 month	hsa-miR-29a-3p	22.9238
Pat7	1 month	hsa-miR-29a-3p	23.2562
Pat7	1 month	hsa-miR-29c-3p	24.2161
Pat7	1 month	hsa-miR-29c-3p	24.222
Pat7	1 month	hsa-miR-29c-3p	24.3411
Pat7	1 month	hsa-miR-532-5p	27.5162
Pat7	1 month	hsa-miR-532-5p	27.5901
Pat7	1 month	hsa-miR-532-5p	27.5371
Pat8	baseline	hsa-miR-149-5p	36.2947
Pat8	baseline	hsa-miR-149-5p	36.1289
Pat8	baseline	hsa-miR-149-5p	36.1729
Pat8	baseline	hsa-miR-16-5p	19.7316
Pat8	baseline	hsa-miR-16-5p	19.7587
Pat8	baseline	hsa-miR-16-5p	19.6694
Pat8	baseline	hsa-miR-191-5p	22.4906
Pat8	baseline	hsa-miR-191-5p	22.5506
Pat8	baseline	hsa-miR-191-5p	22.6004
Pat8	baseline	hsa-miR-29a-3p	22.7402
Pat8	baseline	hsa-miR-29a-3p	22.6812
Pat8	baseline	hsa-miR-29a-3p	22.5542
Pat8	baseline	hsa-miR-29c-3p	23.6337
Pat8	baseline	hsa-miR-29c-3p	23.5024
Pat8	baseline	hsa-miR-29c-3p	23.7643
Pat8	baseline	hsa-miR-532-5p	27.4018
Pat8	baseline	hsa-miR-532-5p	27.3394
Pat8	baseline	hsa-miR-532-5p	27.0283
Pat8	1 month	hsa-miR-149-5p	35.0275
Pat8	1 month	hsa-miR-149-5p	36.3706
Pat8	1 month	hsa-miR-149-5p	38.129
Pat8	1 month	hsa-miR-16-5p	19.3549
Pat8	1 month	hsa-miR-16-5p	19.4361
Pat8	1 month	hsa-miR-16-5p	19.2823
Pat8	1 month	hsa-miR-191-5p	21.9168
Pat8	1 month	hsa-miR-191-5p	22.2198
Pat8	1 month	hsa-miR-191-5p	22.248
Pat8	1 month	hsa-miR-29a-3p	22.7078
Pat8	1 month	hsa-miR-29a-3p	22.5362
Pat8	1 month	hsa-miR-29a-3p	22.6273
Pat8	1 month	hsa-miR-29c-3p	23.6367
Pat8	1 month	hsa-miR-29c-3p	23.5471
Pat8	1 month	hsa-miR-29c-3p	23.5553
Pat8	1 month	hsa-miR-532-5p	27.0315
Pat8	1 month	hsa-miR-532-5p	26.9196
Pat8	1 month	hsa-miR-532-5p	27.1404
Pat9	baseline	hsa-miR-149-5p	35.4973
Pat9	baseline	hsa-miR-149-5p	36.1167
Pat9	baseline	hsa-miR-149-5p	35.2334
Pat9	baseline	hsa-miR-16-5p	20.0446
Pat9	baseline	hsa-miR-16-5p	20.0075
Pat9	baseline	hsa-miR-16-5p	19.9288
Pat9	baseline	hsa-miR-191-5p	22.3475
Pat9	baseline	hsa-miR-191-5p	22.4235
Pat9	baseline	hsa-miR-191-5p	22.4425
Pat9	baseline	hsa-miR-29a-3p	23.2578
Pat9	baseline	hsa-miR-29a-3p	23.639
Pat9	baseline	hsa-miR-29a-3p	23.4347
Pat9	baseline	hsa-miR-29c-3p	24.6619
Pat9	baseline	hsa-miR-29c-3p	24.727
Pat9	baseline	hsa-miR-29c-3p	24.8374
Pat9	baseline	hsa-miR-532-5p	27.4396
Pat9	baseline	hsa-miR-532-5p	27.3695
Pat9	baseline	hsa-miR-532-5p	27.3695
Pat9	1 month	hsa-miR-149-5p	Undetermined
Pat9	1 month	hsa-miR-149-5p	Undetermined
Pat9	1 month	hsa-miR-149-5p	36.7262
Pat9	1 month	hsa-miR-16-5p	20.6278
Pat9	1 month	hsa-miR-16-5p	20.8164
Pat9	1 month	hsa-miR-16-5p	20.7934
Pat9	1 month	hsa-miR-191-5p	23.3206
Pat9	1 month	hsa-miR-191-5p	23.3037
Pat9	1 month	hsa-miR-191-5p	23.3999
Pat9	1 month	hsa-miR-29a-3p	24.9783
Pat9	1 month	hsa-miR-29a-3p	24.6724
Pat9	1 month	hsa-miR-29a-3p	24.9613
Pat9	1 month	hsa-miR-29c-3p	25.7857
Pat9	1 month	hsa-miR-29c-3p	25.7202
Pat9	1 month	hsa-miR-29c-3p	25.9228
Pat9	1 month	hsa-miR-532-5p	28.327
Pat9	1 month	hsa-miR-532-5p	28.447
Pat9	1 month	hsa-miR-532-5p	28.6118
Pat10	baseline	hsa-miR-149-5p	35.9272
Pat10	baseline	hsa-miR-149-5p	34.6049
Pat10	baseline	hsa-miR-149-5p	35.0109
Pat10	baseline	hsa-miR-16-5p	20.3113
Pat10	baseline	hsa-miR-16-5p	20.339
Pat10	baseline	hsa-miR-16-5p	20.2387
Pat10	baseline	hsa-miR-191-5p	22.623
Pat10	baseline	hsa-miR-191-5p	22.6362
Pat10	baseline	hsa-miR-191-5p	22.7205
Pat10	baseline	hsa-miR-29a-3p	22.7594
Pat10	baseline	hsa-miR-29a-3p	22.808
Pat10	baseline	hsa-miR-29a-3p	22.9782
Pat10	baseline	hsa-miR-29c-3p	24.008
Pat10	baseline	hsa-miR-29c-3p	23.8737
Pat10	baseline	hsa-miR-29c-3p	23.8497
Pat10	baseline	hsa-miR-532-5p	27.8077
Pat10	baseline	hsa-miR-532-5p	27.8833
Pat10	baseline	hsa-miR-532-5p	27.7139
Pat10	1 month	hsa-miR-149-5p	36.9622
Pat10	1 month	hsa-miR-149-5p	Undetermined
Pat10	1 month	hsa-miR-149-5p	36.9164
Pat10	1 month	hsa-miR-16-5p	20.4954
Pat10	1 month	hsa-miR-16-5p	20.3264
Pat10	1 month	hsa-miR-16-5p	20.3048
Pat10	1 month	hsa-miR-191-5p	23.44
Pat10	1 month	hsa-miR-191-5p	23.3819
Pat10	1 month	hsa-miR-191-5p	23.3661
Pat10	1 month	hsa-miR-29a-3p	24.098
Pat10	1 month	hsa-miR-29a-3p	24.3943
Pat10	1 month	hsa-miR-29a-3p	24.254
Pat10	1 month	hsa-miR-29c-3p	25.471
Pat10	1 month	hsa-miR-29c-3p	25.2798
Pat10	1 month	hsa-miR-29c-3p	25.25
Pat10	1 month	hsa-miR-532-5p	28.2531
Pat10	1 month	hsa-miR-532-5p	28.2923
Pat10	1 month	hsa-miR-532-5p	28.0898
Pat11	baseline	hsa-miR-149-5p	Undetermined
Pat11	baseline	hsa-miR-149-5p	Undetermined
Pat11	baseline	hsa-miR-149-5p	Undetermined
Pat11	baseline	hsa-miR-16-5p	20.4886
Pat11	baseline	hsa-miR-16-5p	20.6325
Pat11	baseline	hsa-miR-16-5p	20.8566
Pat11	baseline	hsa-miR-191-5p	23.6762
Pat11	baseline	hsa-miR-191-5p	23.5577
Pat11	baseline	hsa-miR-191-5p	23.5666
Pat11	baseline	hsa-miR-29a-3p	23.0541
Pat11	baseline	hsa-miR-29a-3p	23.2178
Pat11	baseline	hsa-miR-29a-3p	23.3365
Pat11	baseline	hsa-miR-29c-3p	24.9956
Pat11	baseline	hsa-miR-29c-3p	24.806
Pat11	baseline	hsa-miR-29c-3p	24.8954
Pat11	baseline	hsa-miR-532-5p	28.1481
Pat11	baseline	hsa-miR-532-5p	28.2404
Pat11	baseline	hsa-miR-532-5p	28.303
Pat11	1 month	hsa-miR-149-5p	Undetermined
Pat11	1 month	hsa-miR-149-5p	35.3642
Pat11	1 month	hsa-miR-149-5p	Undetermined
Pat11	1 month	hsa-miR-16-5p	20.2775
Pat11	1 month	hsa-miR-16-5p	20.2487
Pat11	1 month	hsa-miR-16-5p	20.4189
Pat11	1 month	hsa-miR-191-5p	22.9172
Pat11	1 month	hsa-miR-191-5p	22.8474
Pat11	1 month	hsa-miR-191-5p	22.9627
Pat11	1 month	hsa-miR-29a-3p	24.5725
Pat11	1 month	hsa-miR-29a-3p	24.3698
Pat11	1 month	hsa-miR-29a-3p	23.9895
Pat11	1 month	hsa-miR-29c-3p	24.6873
Pat11	1 month	hsa-miR-29c-3p	24.8667
Pat11	1 month	hsa-miR-29c-3p	24.6564
Pat11	1 month	hsa-miR-532-5p	27.7175
Pat11	1 month	hsa-miR-532-5p	28.0587
Pat11	1 month	hsa-miR-532-5p	28.1253
Pat12	baseline	hsa-miR-149-5p	34.57
Pat12	baseline	hsa-miR-149-5p	33.6623
Pat12	baseline	hsa-miR-149-5p	34.4118
Pat12	baseline	hsa-miR-16-5p	19.6739
Pat12	baseline	hsa-miR-16-5p	19.7682
Pat12	baseline	hsa-miR-16-5p	19.8333
Pat12	baseline	hsa-miR-191-5p	22.5001
Pat12	baseline	hsa-miR-191-5p	22.5195
Pat12	baseline	hsa-miR-191-5p	22.5895
Pat12	baseline	hsa-miR-29a-3p	22.583
Pat12	baseline	hsa-miR-29a-3p	22.7169
Pat12	baseline	hsa-miR-29a-3p	22.5917
Pat12	baseline	hsa-miR-29c-3p	23.797
Pat12	baseline	hsa-miR-29c-3p	23.6315
Pat12	baseline	hsa-miR-29c-3p	23.5709
Pat12	baseline	hsa-miR-532-5p	26.8465
Pat12	baseline	hsa-miR-532-5p	27.2651
Pat12	baseline	hsa-miR-532-5p	27.2144
Pat12	1 month	hsa-miR-149-5p	34.7747
Pat12	1 month	hsa-miR-149-5p	34.8116
Pat12	1 month	hsa-miR-149-5p	34.6194
Pat12	1 month	hsa-miR-16-5p	19.7469
Pat12	1 month	hsa-miR-16-5p	19.7056
Pat12	1 month	hsa-miR-16-5p	19.6322
Pat12	1 month	hsa-miR-191-5p	22.3864
Pat12	1 month	hsa-miR-191-5p	22.5452
Pat12	1 month	hsa-miR-191-5p	22.534
Pat12	1 month	hsa-miR-29a-3p	23.8045
Pat12	1 month	hsa-miR-29a-3p	23.7655
Pat12	1 month	hsa-miR-29a-3p	23.643
Pat12	1 month	hsa-miR-29c-3p	24.5475
Pat12	1 month	hsa-miR-29c-3p	24.5592
Pat12	1 month	hsa-miR-29c-3p	24.5319
Pat12	1 month	hsa-miR-532-5p	27.5292
Pat12	1 month	hsa-miR-532-5p	27.1704
Pat12	1 month	hsa-miR-532-5p	27.5335
Pat13	baseline	hsa-miR-149-5p	Undetermined
Pat13	baseline	hsa-miR-149-5p	34.481
Pat13	baseline	hsa-miR-149-5p	Undetermined
Pat13	baseline	hsa-miR-16-5p	20.0823
Pat13	baseline	hsa-miR-16-5p	20.0836
Pat13	baseline	hsa-miR-16-5p	20.4122
Pat13	baseline	hsa-miR-191-5p	22.8355
Pat13	baseline	hsa-miR-191-5p	22.5722
Pat13	baseline	hsa-miR-191-5p	22.5147
Pat13	baseline	hsa-miR-29a-3p	23.1596
Pat13	baseline	hsa-miR-29a-3p	23.5399
Pat13	baseline	hsa-miR-29a-3p	23.5592
Pat13	baseline	hsa-miR-29c-3p	24.1155
Pat13	baseline	hsa-miR-29c-3p	23.7659
Pat13	baseline	hsa-miR-29c-3p	23.9766
Pat13	baseline	hsa-miR-532-5p	27.7482
Pat13	baseline	hsa-miR-532-5p	27.7152
Pat13	baseline	hsa-miR-532-5p	27.6816
Pat13	1 month	hsa-miR-149-5p	34.0371
Pat13	1 month	hsa-miR-149-5p	33.7759
Pat13	1 month	hsa-miR-149-5p	33.8515
Pat13	1 month	hsa-miR-16-5p	17.4401
Pat13	1 month	hsa-miR-16-5p	17.7358
Pat13	1 month	hsa-miR-16-5p	18.0551
Pat13	1 month	hsa-miR-191-5p	20.3381
Pat13	1 month	hsa-miR-191-5p	20.1944
Pat13	1 month	hsa-miR-191-5p	20.0456
Pat13	1 month	hsa-miR-29a-3p	23.0153
Pat13	1 month	hsa-miR-29a-3p	22.8485
Pat13	1 month	hsa-miR-29a-3p	22.8776
Pat13	1 month	hsa-miR-29c-3p	23.2695
Pat13	1 month	hsa-miR-29c-3p	23.4371
Pat13	1 month	hsa-miR-29c-3p	23.3985
Pat13	1 month	hsa-miR-532-5p	26.7307
Pat13	1 month	hsa-miR-532-5p	26.5863
Pat13	1 month	hsa-miR-532-5p	26.5553
Pat14	baseline	hsa-miR-149-5p	Undetermined
Pat14	baseline	hsa-miR-149-5p	35.9186
Pat14	baseline	hsa-miR-149-5p	Undetermined
Pat14	baseline	hsa-miR-16-5p	20.2823
Pat14	baseline	hsa-miR-16-5p	20.2789
Pat14	baseline	hsa-miR-16-5p	20.0309
Pat14	baseline	hsa-miR-191-5p	22.8115
Pat14	baseline	hsa-miR-191-5p	22.6725
Pat14	baseline	hsa-miR-191-5p	22.7816
Pat14	baseline	hsa-miR-29a-3p	22.9958
Pat14	baseline	hsa-miR-29a-3p	22.9189
Pat14	baseline	hsa-miR-29a-3p	23.1217
Pat14	baseline	hsa-miR-29c-3p	23.9168
Pat14	baseline	hsa-miR-29c-3p	23.9001
Pat14	baseline	hsa-miR-29c-3p	23.9051
Pat14	baseline	hsa-miR-532-5p	28.1472
Pat14	baseline	hsa-miR-532-5p	27.8753
Pat14	baseline	hsa-miR-532-5p	27.7342
Pat14	1 month	hsa-miR-149-5p	35.175
Pat14	1 month	hsa-miR-149-5p	36.5949
Pat14	1 month	hsa-miR-149-5p	35.6326
Pat14	1 month	hsa-miR-16-5p	19.7611
Pat14	1 month	hsa-miR-16-5p	19.6969
Pat14	1 month	hsa-miR-16-5p	19.724
Pat14	1 month	hsa-miR-191-5p	22.2743
Pat14	1 month	hsa-miR-191-5p	21.9266
Pat14	1 month	hsa-miR-191-5p	22.3265
Pat14	1 month	hsa-miR-29a-3p	22.2402
Pat14	1 month	hsa-miR-29a-3p	22.2458
Pat14	1 month	hsa-miR-29a-3p	22.2024
Pat14	1 month	hsa-miR-29c-3p	23.4877
Pat14	1 month	hsa-miR-29c-3p	23.6117
Pat14	1 month	hsa-miR-29c-3p	23.3059
Pat14	1 month	hsa-miR-532-5p	26.8214
Pat14	1 month	hsa-miR-532-5p	27.2124
Pat14	1 month	hsa-miR-532-5p	27.2018
Pat15	baseline	hsa-miR-149-5p	Undetermined
Pat15	baseline	hsa-miR-149-5p	Undetermined
Pat15	baseline	hsa-miR-149-5p	Undetermined
Pat15	baseline	hsa-miR-16-5p	19.008
Pat15	baseline	hsa-miR-16-5p	18.9527
Pat15	baseline	hsa-miR-16-5p	18.9077
Pat15	baseline	hsa-miR-191-5p	21.8354
Pat15	baseline	hsa-miR-191-5p	22.0092
Pat15	baseline	hsa-miR-191-5p	21.8897
Pat15	baseline	hsa-miR-29a-3p	21.5596
Pat15	baseline	hsa-miR-29a-3p	21.2562
Pat15	baseline	hsa-miR-29a-3p	21.5488
Pat15	baseline	hsa-miR-29c-3p	23.53
Pat15	baseline	hsa-miR-29c-3p	23.2926
Pat15	baseline	hsa-miR-29c-3p	23.6169
Pat15	baseline	hsa-miR-532-5p	26.8908
Pat15	baseline	hsa-miR-532-5p	26.7575
Pat15	baseline	hsa-miR-532-5p	26.9448
Pat15	1 month	hsa-miR-149-5p	Undetermined
Pat15	1 month	hsa-miR-149-5p	33.6589
Pat15	1 month	hsa-miR-149-5p	33.9469
Pat15	1 month	hsa-miR-16-5p	18.7131
Pat15	1 month	hsa-miR-16-5p	18.5183
Pat15	1 month	hsa-miR-16-5p	18.518
Pat15	1 month	hsa-miR-191-5p	21.321
Pat15	1 month	hsa-miR-191-5p	21.5235
Pat15	1 month	hsa-miR-191-5p	21.3654
Pat15	1 month	hsa-miR-29a-3p	22.01
Pat15	1 month	hsa-miR-29a-3p	21.8995
Pat15	1 month	hsa-miR-29a-3p	21.7025
Pat15	1 month	hsa-miR-29c-3p	23.7976
Pat15	1 month	hsa-miR-29c-3p	24.3026
Pat15	1 month	hsa-miR-29c-3p	24.194
Pat15	1 month	hsa-miR-532-5p	26.4426
Pat15	1 month	hsa-miR-532-5p	26.4848
Pat15	1 month	hsa-miR-532-5p	26.1261
Pat16	baseline	hsa-miR-149-5p	33.8296
Pat16	baseline	hsa-miR-149-5p	32.7632
Pat16	baseline	hsa-miR-149-5p	32.7538
Pat16	baseline	hsa-miR-16-5p	17.5676
Pat16	baseline	hsa-miR-16-5p	17.4659
Pat16	baseline	hsa-miR-16-5p	17.5719
Pat16	baseline	hsa-miR-191-5p	20.3115
Pat16	baseline	hsa-miR-191-5p	20.374
Pat16	baseline	hsa-miR-191-5p	20.2971
Pat16	baseline	hsa-miR-29a-3p	20.3338
Pat16	baseline	hsa-miR-29a-3p	20.3183
Pat16	baseline	hsa-miR-29a-3p	20.3158
Pat16	baseline	hsa-miR-29c-3p	21.9064
Pat16	baseline	hsa-miR-29c-3p	21.8286
Pat16	baseline	hsa-miR-29c-3p	22.0323
Pat16	baseline	hsa-miR-532-5p	25.2948
Pat16	baseline	hsa-miR-532-5p	25.4314
Pat16	baseline	hsa-miR-532-5p	25.04
Pat16	1 month	hsa-miR-149-5p	33.9288
Pat16	1 month	hsa-miR-149-5p	34.9065
Pat16	1 month	hsa-miR-149-5p	33.0023
Pat16	1 month	hsa-miR-16-5p	18.4727
Pat16	1 month	hsa-miR-16-5p	18.4755
Pat16	1 month	hsa-miR-16-5p	18.5134
Pat16	1 month	hsa-miR-191-5p	21.6616
Pat16	1 month	hsa-miR-191-5p	21.3447
Pat16	1 month	hsa-miR-191-5p	21.1067
Pat16	1 month	hsa-miR-29a-3p	21.6881
Pat16	1 month	hsa-miR-29a-3p	21.4395
Pat16	1 month	hsa-miR-29a-3p	21.7068
Pat16	1 month	hsa-miR-29c-3p	23.7243
Pat16	1 month	hsa-miR-29c-3p	23.8993
Pat16	1 month	hsa-miR-29c-3p	23.7264
Pat16	1 month	hsa-miR-532-5p	26.6577
Pat16	1 month	hsa-miR-532-5p	26.3353
Pat16	1 month	hsa-miR-532-5p	26.2861
Pat17	baseline	hsa-miR-149-5p	Undetermined
Pat17	baseline	hsa-miR-149-5p	36.0915
Pat17	baseline	hsa-miR-149-5p	36.9857
Pat17	baseline	hsa-miR-16-5p	20.4978
Pat17	baseline	hsa-miR-16-5p	20.5246
Pat17	baseline	hsa-miR-16-5p	20.6202
Pat17	baseline	hsa-miR-191-5p	23.0134
Pat17	baseline	hsa-miR-191-5p	22.8822
Pat17	baseline	hsa-miR-191-5p	23.0048
Pat17	baseline	hsa-miR-29a-3p	22.915
Pat17	baseline	hsa-miR-29a-3p	23.3281
Pat17	baseline	hsa-miR-29a-3p	23.0526
Pat17	baseline	hsa-miR-29c-3p	24.0291
Pat17	baseline	hsa-miR-29c-3p	24.1895
Pat17	baseline	hsa-miR-29c-3p	24.1456
Pat17	baseline	hsa-miR-532-5p	27.9533
Pat17	baseline	hsa-miR-532-5p	27.6842
Pat17	baseline	hsa-miR-532-5p	27.8224
Pat17	1 month	hsa-miR-149-5p	36.5745
Pat17	1 month	hsa-miR-149-5p	35.9854
Pat17	1 month	hsa-miR-149-5p	35.716
Pat17	1 month	hsa-miR-16-5p	20.1651
Pat17	1 month	hsa-miR-16-5p	20.0861
Pat17	1 month	hsa-miR-16-5p	19.9205
Pat17	1 month	hsa-miR-191-5p	22.756
Pat17	1 month	hsa-miR-191-5p	22.8522
Pat17	1 month	hsa-miR-191-5p	23.0903
Pat17	1 month	hsa-miR-29a-3p	23.6962
Pat17	1 month	hsa-miR-29a-3p	23.6471
Pat17	1 month	hsa-miR-29a-3p	23.7016
Pat17	1 month	hsa-miR-29c-3p	24.6744
Pat17	1 month	hsa-miR-29c-3p	24.6841
Pat17	1 month	hsa-miR-29c-3p	24.6809
Pat17	1 month	hsa-miR-532-5p	27.9066
Pat17	1 month	hsa-miR-532-5p	27.8553
Pat17	1 month	hsa-miR-532-5p	28.0026
Pat18	baseline	hsa-miR-149-5p	35.1202
Pat18	baseline	hsa-miR-149-5p	36.0428
Pat18	baseline	hsa-miR-149-5p	Undetermined
Pat18	baseline	hsa-miR-16-5p	20.6021
Pat18	baseline	hsa-miR-16-5p	20.5694
Pat18	baseline	hsa-miR-16-5p	20.6657
Pat18	baseline	hsa-miR-191-5p	23.8522
Pat18	baseline	hsa-miR-191-5p	23.8653
Pat18	baseline	hsa-miR-191-5p	23.8701
Pat18	baseline	hsa-miR-29a-3p	23.7041
Pat18	baseline	hsa-miR-29a-3p	23.8314
Pat18	baseline	hsa-miR-29a-3p	23.5755
Pat18	baseline	hsa-miR-29c-3p	24.6399
Pat18	baseline	hsa-miR-29c-3p	24.5273
Pat18	baseline	hsa-miR-29c-3p	24.6755
Pat18	baseline	hsa-miR-532-5p	28.1101
Pat18	baseline	hsa-miR-532-5p	28.1315
Pat18	baseline	hsa-miR-532-5p	27.6227
Pat18	1 month	hsa-miR-149-5p	Undetermined
Pat18	1 month	hsa-miR-149-5p	36.2225
Pat18	1 month	hsa-miR-149-5p	35.9317
Pat18	1 month	hsa-miR-16-5p	20.5414
Pat18	1 month	hsa-miR-16-5p	20.443
Pat18	1 month	hsa-miR-16-5p	20.4122
Pat18	1 month	hsa-miR-191-5p	23.2265
Pat18	1 month	hsa-miR-191-5p	23.3412
Pat18	1 month	hsa-miR-191-5p	23.2914
Pat18	1 month	hsa-miR-29a-3p	24.1762
Pat18	1 month	hsa-miR-29a-3p	24.1942
Pat18	1 month	hsa-miR-29a-3p	23.7495
Pat18	1 month	hsa-miR-29c-3p	24.9072
Pat18	1 month	hsa-miR-29c-3p	25.0183
Pat18	1 month	hsa-miR-29c-3p	25.009
Pat18	1 month	hsa-miR-532-5p	28.3006
Pat18	1 month	hsa-miR-532-5p	28.2834
Pat18	1 month	hsa-miR-532-5p	27.9243
